# Supplementary material for: Influence of the heteroatom introduction on the physicochemical properties of 5-heterotruxenes containing nitrogen, oxygen and sulfur atom
Source: Royal Society of Chemistry journal article supplement (doi:10.1039/d0ra07483g), 2020-01-01

# Influence of the heteroatom introduction on the physicochemical properties of 5-heterotruxenes containing nitrogen, oxygen and sulfur atom

Krzysztof Górski\*, Krzysztof Noworyta, Justyna Mech-Piskorz\*

Institute of Physical Chemistry, Polish Academy of Sciences; Kasprzaka 44/52, 01-224 Warsaw, Poland

KEYWORDS: truxene, heterotruxene, thiatruxene, azatruxene, oxatruxene, sulfoxide, sulfone, NMR spectra, hot chromatography,

## Table of contents

|                                                                |    |
|----------------------------------------------------------------|----|
| 1. Synthesis of NCC .....                                      | 2  |
| 2. "Hot" chromatography apparatus .....                        | 7  |
| 3. Scan rate of truxene and 5-hetrotruxenes.....               | 8  |
| 4. Reduction of (OS)CC.....                                    | 14 |
| 5. Spectral radiation distribution of the UV-C lamp .....      | 14 |
| 6. NMR spectra of 5 in CD <sub>2</sub> Cl <sub>2</sub> .....   | 15 |
| 7. NMR spectra of 6 in CDCl <sub>3</sub> .....                 | 19 |
| 8. NMR spectra of 7 in CDCl <sub>3</sub> .....                 | 23 |
| 9. NMR spectra of 8 in CDCl <sub>3</sub> .....                 | 27 |
| 10. NMR spectra of NCC in C <sub>6</sub> D <sub>6</sub> .....  | 31 |
| 11. NMR spectra of 9a in CDCl <sub>3</sub> .....               | 35 |
| 12. NMR spectra of 10 in CDCl <sub>3</sub> .....               | 39 |
| 13. NMR spectra of 9b in CD <sub>2</sub> Cl <sub>2</sub> ..... | 43 |

## 1. Synthesis of NCC

Acetophenone, triphenylphosphine, methanesulfonic acid, and tetraethoxysilane were purchased at Sigma Aldrich and ABCR. 2-(Indan-1-ylidene)indan-1-one was synthesized according to literature data.<sup>1</sup> For reactions at higher temperatures, a heating mantle was used. Solvents used for the synthesis were analytical grade. In NMR measurement, the standard residual solvent peak was taken as an internal NMR chemical shift.

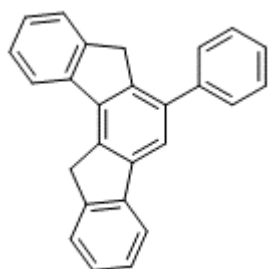

*6-phenyl-7,12-dihydroindeno[1,2-a]fluorene*, **5** – 2-(Indan-1-ylidene)indan-1-one **1** (246 mg, 1 mmol) and acetophenone **2** (132 mg, 1.1 mmol) were dissolved in 3 ml of dichloromethane. Next methanesulfonic acid (130  $\mu$ L, 2 mmol, 1,484 g/mL) and tetraethoxysilane (0.9 mL, 4 mmol, 0.933 g/mL) were added. Then the temperature of obtained mixture was increased to 50  $^{\circ}$ C. After 72 h mixture was adsorbed at 1 g of silica gel and the crude product was purified via “hot” chromatography (see page S7 SI) using 1 g of

silica gel, as stationary phase, and boiling hexane, as eluent. After evaporation of the majority of the solvent, the precipitate was filtered off and washed two times with 2 mL of cooled methanol to obtain 198 mg of **5**, as pale yellow solid, with the reaction yield of 60%.

**Procedure without orthosilicate:** 2-(Indan-1-ylidene)indan-1-one **1** (246 mg, 1 mmol) and acetophenone **2** (132 mg, 1.1 mmol) were dissolved in 0.5 mL of 1,2-dichloroethane. After the addition of methanesulfonic acid (130  $\mu$ L, 2 mmol, 1,484 g/mL) temperature of the obtained mixture was increased to 100  $^{\circ}$ C. After 72 h mixture was adsorbed at 1 g of silica gel and the crude product was purified via “hot” chromatography (see page S7 SI) using 1 g of silica gel, as stationary phase, and boiling hexane, as eluent. After evaporation of the majority of the solvent obtained precipitate was filtered off and washed two times with 2 mL of cooled methanol to obtain 185 mg of **5**, as pale yellow solid, with the reaction yield of 56%.

$^1\text{H}$  NMR (500 MHz,  $\text{CD}_2\text{Cl}_2$ )  $\delta$ : 7.96 (d,  $J$  = 7.6 Hz, 1H), 7.87 (d,  $J$  = 7.5 Hz, 1H), 7.79 (s, 1H), 7.68 (d,  $J$  = 7.3 Hz, 1H), 7.65 (d,  $J$  = 1.2 Hz, 1H), 7.64 (s, 1H), 7.58 (d,  $J$  = 7.4 Hz, 1H), 7.53 (t,  $J$  = 7.6 Hz, 2H), 7.48 (t,  $J$  = 7.5 Hz, 1H), 7.43 (dd,  $J$  = 14.6, 7.3 Hz, 2H), 7.36 (t,  $J$  = 7.1 Hz, 2H), 4.25 (s, 2H), 4.03 (s, 2H)

7.43 (dd,  $J$  = 14.6, 7.3 Hz, 2H), 7.36 (t,  $J$  = 7.1 Hz, 2H), 4.25 (s, 2H), 4.03 (s, 2H)

$^{13}\text{C}$   $\{^1\text{H}\}$  NMR (126 MHz,  $\text{CD}_2\text{Cl}_2$ )  $\delta$ : 144.4, 143.9, 142.2, 141.9, 141.9, 141.8, 140.4, 138.6, 138.3, 135.9, 129.1, 128.9, 127.6, 127.2, 127.2, 127.1, 127.0, 125.6, 125.4, 122.5, 120.2, 119.2, 37.7, 36.5

HRMS (EI–TOF)  $m/z$  ( $M^+$ ): calcd for  $\text{C}_{26}\text{H}_{18}$ , 330.1409; found, 330.1410;

elemental analysis (%): calcd for  $\text{C}_{26}\text{H}_{18}$ : C, 94.51; H, 5.49. Found: C, 94.55; H, 5.45.

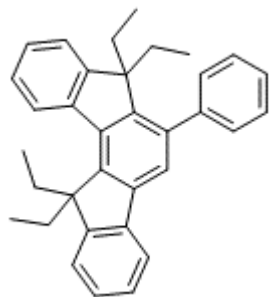

*7,7,12,12-tetraethyl-6-phenyl-7,12-dihydroindeno[1,2-a]fluorene*, **6** – 6-phenyl-7,12-dihydroindeno[1,2-a]fluorene **5** (990 mg, 3 mmol) was dispersed in the mixture of 15 mL of tetrahydrofuran and 15 mL of N-methylpyrrolidone. Then the obtained solution was deaerated two times, using a vacuum/argon procedure. After that the mixture was cooled to -78 °C, under an argon atmosphere, and sodium hydride was added (1.06 g, 26.4 mmol, 60% in mineral oil). The reaction temperature was slowly elevated and kept between -10 –

0 °C. After all gas was released, the dropwise addition of bromoethane (1.96 mL, 26.4 mmol,  $d = 1.47 \text{ g/mL}$ ) to the dark red solution was started. After 16 h, 15 mL of hexane and 15 mL of water were added to the reaction mixture. Then the organic layer was separated, dried over  $\text{MgSO}_4$  and evaporated. The crude product was purified via column chromatography using silica gel, as a stationary phase, and hexane, as eluent, to obtain 1.3 g of **6**, as a white solid, with the reaction yield of 98%.

$^1\text{H}$  NMR (500 MHz,  $\text{CDCl}_3$ )  $\delta$ : 8.25 (d,  $J = 7.8 \text{ Hz}$ , 1H), 7.65 – 7.61 (m, 1H), 7.45 – 7.42 (m, 4H), 7.41 – 7.37 (m, 4H), 7.36 – 7.30 (m, 3H), 7.28 (d,  $J = 7.4 \text{ Hz}$ , 1H), 2.92 – 2.83 (m, 2H), 2.23 (dq,  $J = 14.7, 7.4 \text{ Hz}$ , 2H), 1.85 – 1.79 (m, 2H), 1.77 – 1.72 (m, 2H), 0.32 (t,  $J = 7.3 \text{ Hz}$ , 6H), 0.26 (t,  $J = 7.3 \text{ Hz}$ , 6H).

$^{13}\text{C}$  { $^1\text{H}$ } NMR (126 MHz,  $\text{CDCl}_3$ )  $\delta$ : 151.9, 151.1, 144.6, 142.3, 142.1, 141.4, 141.4, 140.8, 139.5, 138.4, 129.1, 127.5, 127.1, 127.1, 126.8, 126.7, 126.3, 124.1, 122.9, 122.0, 121.1, 118.8, 58.1, 57.4, 32.4, 30.0, 8.8, 8.1.

HRMS (EI-TOF)  $m/z$  ( $M^+$ ): calcd for  $\text{C}_{34}\text{H}_{34}$ , 442.2661; found, 442.2663;

elemental analysis (%): calcd for  $\text{C}_{34}\text{H}_{34}$ : C, 92.26; H, 7.74. Found: C, 92.31; H, 7.69.

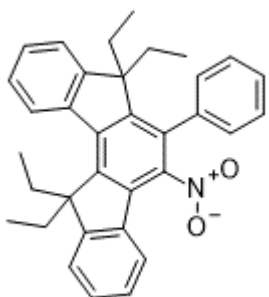

*5-nitro-7,7,12,12-tetraethyl-6-phenyl-7,12-dihydroindeno[1,2-a]fluorene*, **7** – 7,7,12,12-tetraethyl-6-phenyl-7,12-

dihydroindeno[1,2-a]fluorene **6** (1.33 g, 3 mmol) was dissolved in 30 mL of dichloromethane. Then 1 mL of concentrated nitric acid (65% aqua solution) was added. After 30 min in room temperature, the reaction was completed (monitored by TLC,  $\text{SiO}_2$ /10% solution of dichloromethane in hexane). 30 mL of water was added to the obtained mixture. Next the organic layer was separated, washed

with 10 mL of 10% aqua solution of NaOH, and dried over  $\text{MgSO}_4$ . After evaporation of the solvent, 1.46 g of **7**, as a yellow solid, was obtained with the reaction yield of ~ 100%.

$^1\text{H}$  NMR (500 MHz,  $\text{CDCl}_3$ )  $\delta$ : 8.28 (d,  $J = 7.4 \text{ Hz}$ , 1H), 7.46 – 7.34 (m, 10H), 7.32 – 7.26 (m, 2H), 2.89 (dq,  $J = 14.5, 7.2 \text{ Hz}$ , 2H), 2.22 (dq,  $J = 14.7, 7.4 \text{ Hz}$ , 2H), 1.72 (q,  $J = 7.3 \text{ Hz}$ , 4H), 0.30 (t,  $J = 7.3 \text{ Hz}$ , 6H), 0.24 (t,  $J = 7.4 \text{ Hz}$ , 6H).

$^{13}\text{C}$  { $^1\text{H}$ } NMR (126 MHz,  $\text{CDCl}_3$ )  $\delta$ : 152.5, 151.6, 145.8, 145.1, 144.5, 140.8, 139.1, 136.1, 133.0, 131.5, 129.9, 129.4, 128.7, 128.7, 127.9, 127.7, 127.5, 126.8, 124.9, 122.4, 122.2, 120.6, 58.2, 57.9, 32.2, 29.7, 8.8, 8.0.

HRMS (EI-TOF)  $m/z$  ( $M^+$ ): calcd for  $C_{34}H_{33}NO_2$ , 487.2511; found, 487.2512;

elemental analysis (%): calcd for  $C_{34}H_{33}NO_2$ : C, 83.74; H, 6.82; N, 2.87. Found: C, 83.79; H, 6.85; N, 2.89.

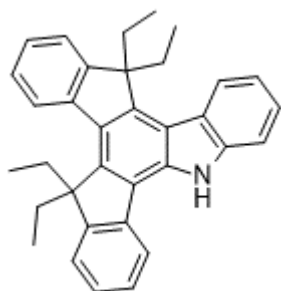

*10,10,15,15-tetraethyl-5-azatruxene*, **8** – To the 5-nitro-7,7,12,12-tetraethyl-6-phenyl-7,12-dihydroindeno[1,2-a]fluorene **7** (852.7 mg, 1.75 mmol) triphenylphosphine (1.84 g, 7 mmol) was added, and the mixture was heated up to 270-280 °C, in an argon atmosphere. After 1 h a dark solution was cooled to room temperature and then dissolved in 17.5 mL of dichloromethane. The crude product was adsorbed at silica gel and purified via column chromatography, using silica gel, as stationary phase, and

10% solution of dichloromethane in hexane→20% solution of dichloromethane in hexane, as eluent, to obtain 488 mg of **8**, as a white solid, with the reaction yield of 61%.

$^1H$  NMR (500 MHz,  $CDCl_3$ )  $\delta$ : 8.68 (s, 1H), 8.57 (d,  $J = 8.1$  Hz, 1H), 8.30 (d,  $J = 7.7$  Hz, 1H), 7.86 (d,  $J = 7.5$  Hz, 1H), 7.63 (d,  $J = 8.0$  Hz, 1H), 7.52 – 7.47 (m, 4H), 7.43 – 7.40 (m,  $J = 10.6, 4.3$  Hz, 2H), 7.34 (t,  $J = 7.5$  Hz, 2H), 3.06 – 2.96 (m, 4H), 2.32 – 2.23 (m, 4H), 0.27 (t,  $J = 7.3$  Hz, 6H), 0.23 (t,  $J = 7.3$  Hz, 6H).

$^{13}C$   $\{^1H\}$  NMR (126 MHz,  $CDCl_3$ )  $\delta$  151.6, 150.9, 145.6, 142.5, 142.1, 140.8, 140.7, 135.0, 132.0, 126.8, 126.3, 126.1, 125.4, 125.4, 124.9, 124.1, 123.3, 122.5, 122.3, 122.3, 119.8, 119.6, 119.6, 111.2, 58.7, 57.0, 30.0, 29.8, 8.7, 8.5.

HRMS (EI-TOF)  $m/z$  ( $M^+$ ): calcd for  $C_{34}H_{33}N$ , 455.2613; found, 455.2612;

elemental analysis (%): calcd for  $C_{34}H_{33}N$ : C, 89.63; H, 7.30; N, 3.07. Found: C, 89.67; H, 7.31; N, 3.02.

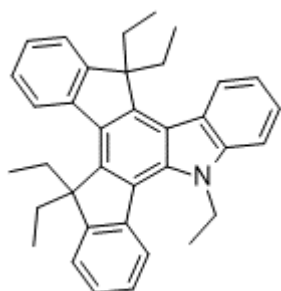

*5,10,10,15,15-pentaethyl-5-azatruxene*, **NCC** – *10,10,15,15-tetraethyl-5-azatruxene* **8** (455 mg, 1 mmol) was dissolved in 5 mL of dimethylformamide (purged with an argon for 1 h at 0 °C). Then shredded potassium hydroxide (122 mg, 2.2 mmol) was added, followed by dropwise addition of bromoethane (0.164 mL, 2.2 mmol,  $d = 1.46$  g/mL). After 16 h, 10 mL of water was added and the obtained mixture was extracted 5 times with 5 mL of hexane. Combined extracts were dried over  $MgSO_4$  and evaporated

to obtain 483 mg of **NCC**, as white solid, with the reaction yield of ~100%. Analysis are in accordance with literature data.<sup>2</sup>

$^1H$  NMR (500 MHz,  $C_6D_6$ )  $\delta$ : 8.67 (d,  $J = 7.9$  Hz, 1H), 8.43 (d,  $J = 7.9$  Hz, 1H), 7.86 (d,  $J = 7.6$  Hz, 1H), 7.44 – 7.20 (m, 9H), 4.33 (q,  $J = 7.0$  Hz, 2H), 3.11 (m, 4H), 2.17 (m, 4H), 0.67 (t,  $J = 7.0$  Hz, 3H), 0.42 (t,  $J = 7.3$  Hz, 6H), 0.32 (t,  $J = 7.3$  Hz, 6H)

$^{13}C$   $\{^1H\}$  NMR (126 MHz,  $C_6D_6$ )  $\delta$ : 151.5, 151.2, 145.3, 145.0, 143.3, 142.0, 140.6, 139.0, 132.8, 127.9, 126.6, 126.4, 126.2, 126.0, 125.6, 125.3, 124.9, 123.6, 122.8, 122.5, 122.3, 122.2, 120.2, 112.2, 58.2, 56.9, 42.1, 30.0, 29.8, 12.5, 8.6, 8.4;

Elemental analysis (%). Calcd for C<sub>36</sub>H<sub>37</sub>N: C 89.39, H 7.71, N 2.90; Found: C 89.42, H 7.76. N 2.83.

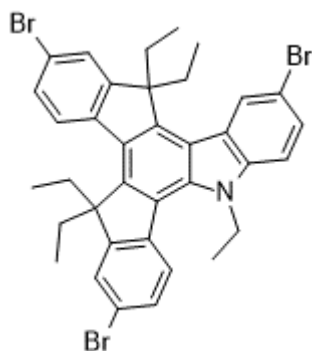

*2,8,12-tribromo-5,10,10,15,15-pentaethyl-5-azatruxene, 9a* – 484 mg (1 mmol) of 5,10,10,15,15-pentaethyl-5-azatruxene **NCC** was dissolved in 1 mL of dichloromethane at 0 °C. At this step 0.16 mL (3.1 mmol, 3.1 equiv) of bromine and was slowly added. After 1 h, 10 mL of methanol was added dropwise and the formed white precipitate was filtrated, to get 626.4 mg (87%) of tribromoderivative. In the case of no precipitate, the obtained solution was cooled to 0 °C and obtained crystals were filtrated.

<sup>1</sup>H NMR (500 MHz, CDCl<sub>3</sub>) δ: 8.57 (d, *J* = 1.6 Hz, 1H), 8.07 (d, *J* = 8.4 Hz, 1H), 7.72 (d, *J* = 8.2 Hz, 1H), 7.62 – 7.46 (m, 6H), 4.63 (q, *J* = 7.0 Hz, 2H), 2.96 – 2.82 (m, 4H), 2.24 – 2.13 (m, 4H), 0.97 (t, *J* = 7.0 Hz, 3H), 0.24 (t, *J* = 7.3 Hz, 6H), 0.19 (t, *J* = 7.3 Hz, 6H).

<sup>13</sup>C {<sup>1</sup>H} NMR (126 MHz, CDCl<sub>3</sub>) δ 153.8, 153.6, 145.2, 143.7, 143.6, 140.3, 139.1, 139.0, 131.9, 129.5, 129.5, 128.3, 127.4, 126.6, 125.7, 125.6, 125.5, 124.8, 123.6, 121.5, 120.3, 120.0, 113.5, 113.2, 58.5, 57.4, 42.6, 29.9, 29.6, 13.0, 8.6, 8.5.

HRMS (EI–TOF) *m/z* (M<sup>+</sup>): calcd for C<sub>36</sub>H<sub>34</sub>NBr<sub>3</sub>: 717.0241; found: 717.0245;

Elemental analysis (%). Calcd for C<sub>36</sub>H<sub>34</sub>NBr<sub>3</sub>: C 60.02, H 4.76, N 1.94; Found: C 60.09, H 4.80. N 1.99.

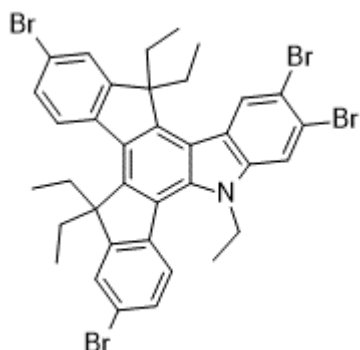

*2,7,8,12-tetrabromo-5,10,10,15,15-pentaethyl-5-azatruxene, 10* – 484 mg (1 mmol) of 5,10,10,15,15-pentaethyl-5-azatruxene **NCC** was dissolved in 1 mL of dichloromethane at 0 °C and 0.21 mL (4.1 mmol, 4.1 equiv) of bromine was slowly added. After 1 h, 10 mL of methanol was added dropwise and the formed white precipitate was filtrated, to get 728 mg (91%) of tetrabromoderivative.

<sup>1</sup>H NMR (500 MHz, CDCl<sub>3</sub>) δ: 8.67 (s, 1H), 8.07 (d, *J* = 8.4 Hz, 1H), 7.80 (d, *J* = 7.7 Hz, 1H), 7.59 – 7.51 (m, 5H), 4.76 (q, *J* = 6.9 Hz, 2H), 2.89 – 2.85 (m, 2H), 2.79 – 2.74 (m, 2H), 2.26 – 2.15 (m, 4H), 0.49 (t, *J* = 7.0 Hz, 3H), 0.24 (t, *J* = 7.2 Hz, 6H), 0.19 (t, *J* = 7.1 Hz, 6H).

<sup>13</sup>C {<sup>1</sup>H} NMR (126 MHz, CDCl<sub>3</sub>) δ: 153.2, 153.4, 145.1, 144.8, 144.6, 143.3, 139.9, 138.1, 133.7, 130.2, 129.9, 129.8, 127.5, 127.0, 125.6, 125.6, 125.5, 124.9, 123.9, 122.3, 120.9, 120.5, 117.7, 112.2, 58.9, 57.3, 45.2, 30.1, 29.6, 12.0, 8.6, 8.5.

HRMS (EI–TOF) *m/z* (M<sup>+</sup>): calcd for C<sub>36</sub>H<sub>33</sub>NBr<sub>4</sub>: 794.9346; found: 794.9350;

Elemental analysis (%). Calcd for C<sub>36</sub>H<sub>33</sub>NBr<sub>4</sub>: C 54.10, H 4.16, N 1.75; Found: C 54.12, H 4.21. N 1.74.

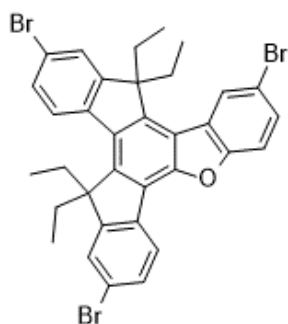

2,8,12-tribromo-10,10,15,15-tetraethyl-5-oxatruxene, **9b** – 456 mg (1 mmol) of 10,10,15,15-tetraethyl-5-oxatruxene **OCC** was dissolved in 1 mL of dichloromethane at 0 °C and 0.16 mL (3.1 mmol, 3.1 equiv) of bromine was slowly added. After 1 h, 10 mL of methanol was added dropwise, and the white precipitate was filtrated to get 631 mg (93%) of tribromoderivative.

$^1\text{H}$  NMR (500 MHz,  $\text{CD}_2\text{Cl}_2$ )  $\delta$ : 8.46 (s, 1H), 8.21 (d,  $J = 8.5$  Hz, 1H), 8.12 (d,  $J = 8.4$  Hz, 1H), 7.68 (d,  $J = 0.8$  Hz, 2H), 7.65 – 7.62 (m, 3H), 7.57 (dd,  $J = 8.4$ , 1.9 Hz, 1H), 2.87 (dq,  $J = 14.6$ , 7.3 Hz, 2H), 2.77 (dq,  $J = 14.3$ , 7.3 Hz, 2H), 2.25 (m, 4H), 0.27 (t,  $J = 7.3$  Hz, 6H), 0.22 (t,  $J = 7.3$  Hz, 6H).

$^{13}\text{C}$   $\{^1\text{H}\}$  NMR (126 MHz,  $\text{CD}_2\text{Cl}_2$ )  $\delta$ : 155.9, 153.1, 153.1, 151.9, 145.3, 143.8, 140.0, 137.8, 133.8, 130.4, 129.8, 129.8, 127.0, 125.8, 125.6, 125.0, 125.0, 125.0, 123.5, 121.3, 120.5, 119.0, 115.7, 113.5, 59.8, 57.3, 30.4, 29.7, 8.4, 8.1.

HRMS (EI-TOF)  $m/z$  ( $M^+$ ): calcd for  $\text{C}_{34}\text{H}_{29}\text{OBr}_3$ : 689.9768; found: 689.9753;

Elemental analysis (%). Calcd for  $\text{C}_{34}\text{H}_{29}\text{OBr}_3$ : C 58.90, H 4.22; Found: C 59.02, H 4.25.

- 1 K. Górski, J. Mech-Piskorz, K. Noworyta, B. Leśniewska and M. Pietraszkiewicz, *New J. Chem.*, 2018, **42**, 5844–5852.
- 2 K. Górski, J. Mech-Piskorz, B. Leśniewska, O. Pietraszkiewicz and M. Pietraszkiewicz, *J. Org. Chem.*, 2019, **84**, 11553–11561.

## 2. "Hot" chromatography apparatus

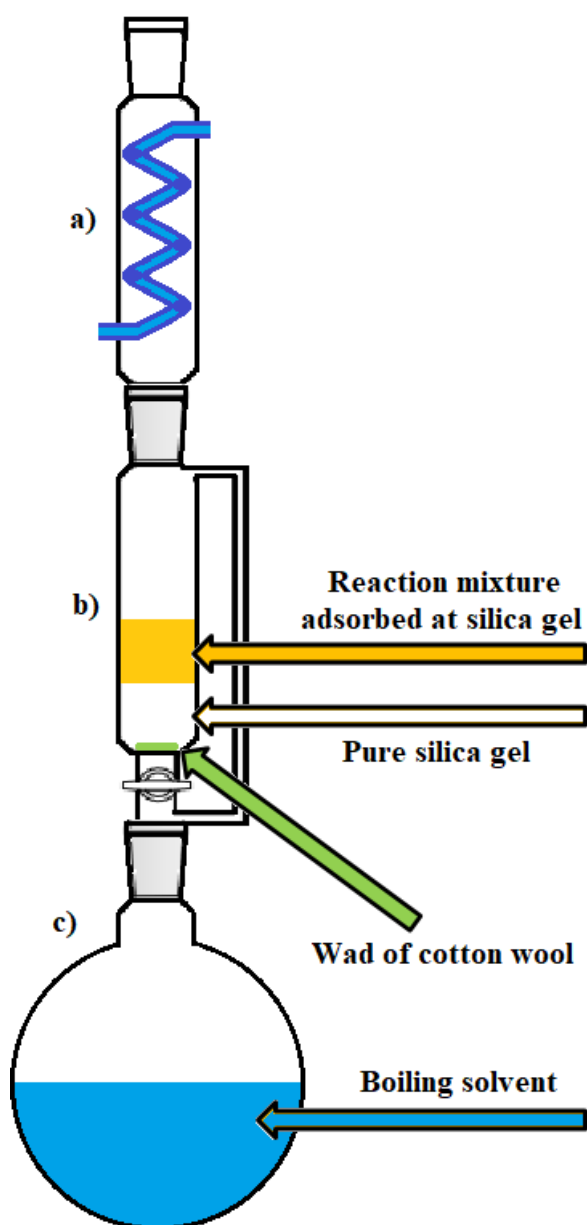

Scheme S1. „Hot” chromatography apparatus.

Apparatus for “hot” chromatography purification is presented on Scheme S1. It consists of three main parts: a) **condenser**, b) **dropping funnel with pressure equalizing tube**. The reaction mixture is adsorbed at silica gel before purification. Then pure silica is placed on a cotton wad inside the dropping funnel and the reaction mixture previously adsorbed at the silica gel is placed on top. c) **round-bottom flask** filled with boiling solvent, heated with a heating mantle. Such apparatus allows chromatographic purification by an eluent negligible dissolving product at room temperature (as in the case of compound **5** in hexane). What is more, the continuous nature of the process allows the minimization of the solvent used for chromatography, making the process cheaper, and more environmentally friendly. It is particularly important during syntheses on a larger scale. Comparative TLC analysis of the extract with the droplet from the funnel indicates the end of purification.

### 3. Scan rate of truxene and 5-hetrotruxenes.

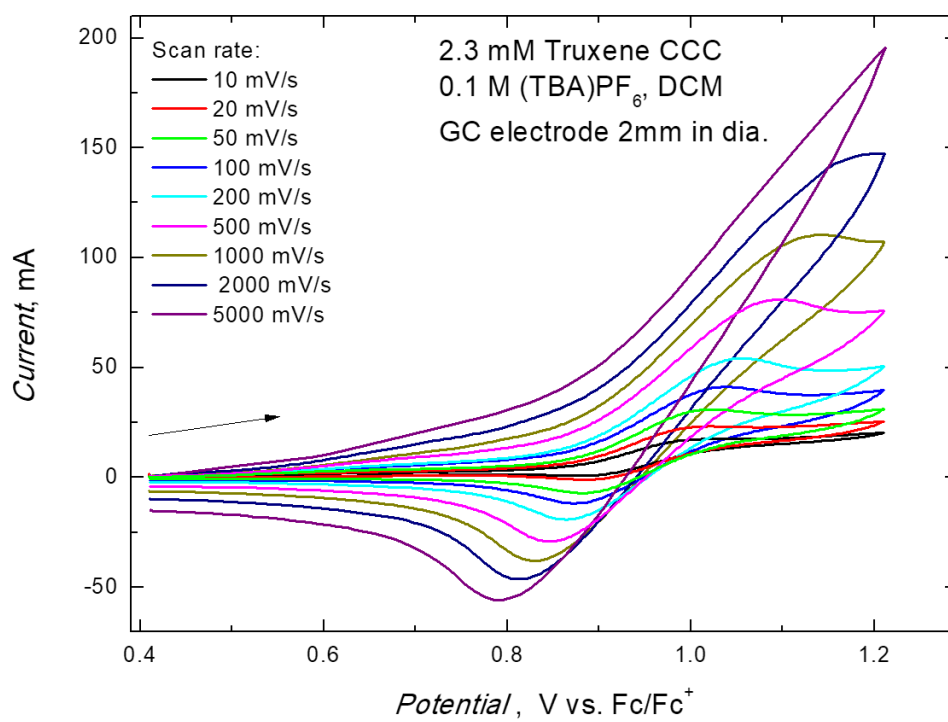

Figure S1 Cyclic voltammograms of CCC in 0.1 M (TBA)PF<sub>6</sub> in DCM, at different scan rates.



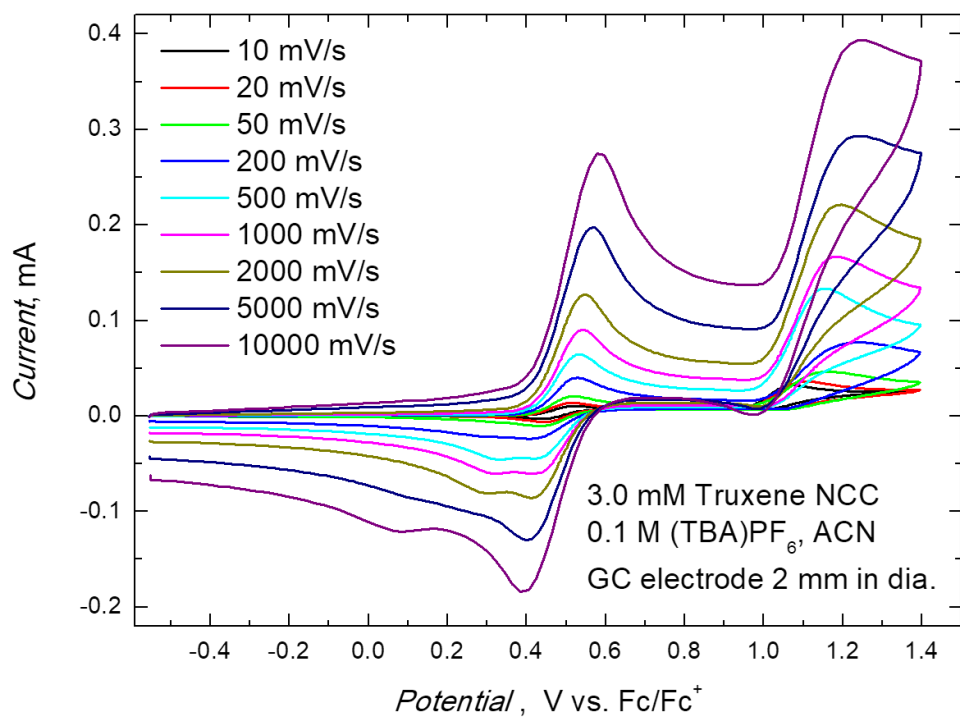

Figure S2. Cyclic voltammograms of **NCC** in 0.1 M (TBA)PF<sub>6</sub> in ACN, at different scan rates.

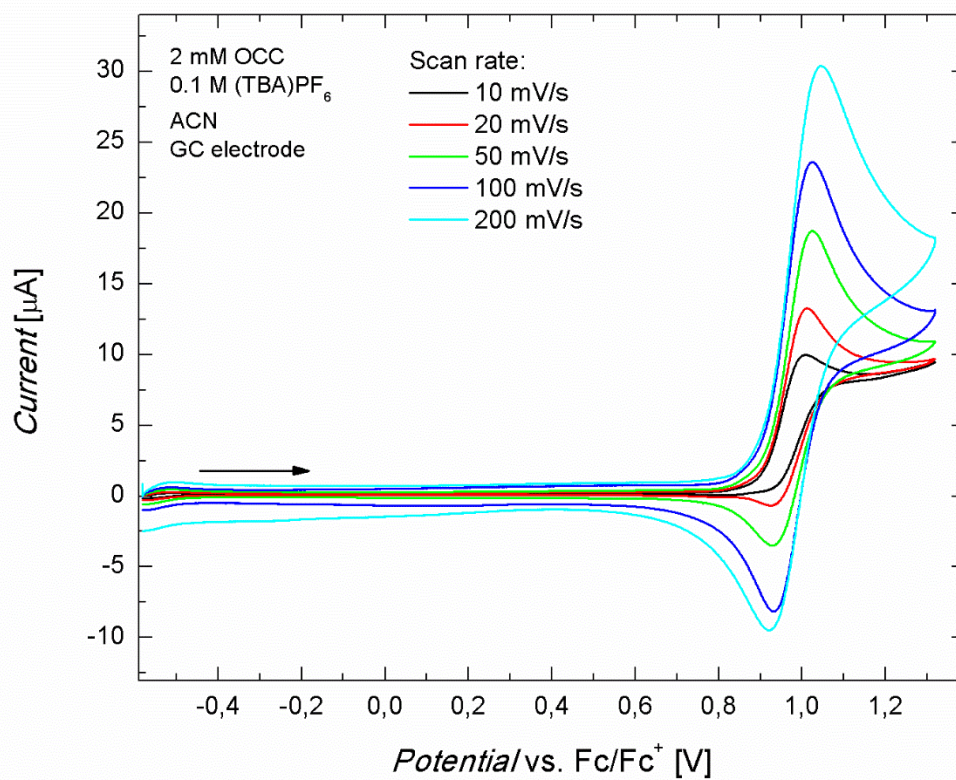

Figure S3. Cyclic voltammograms of **OCC** in 0.1 M (TBA)PF<sub>6</sub> in ACN, at different scan rates.

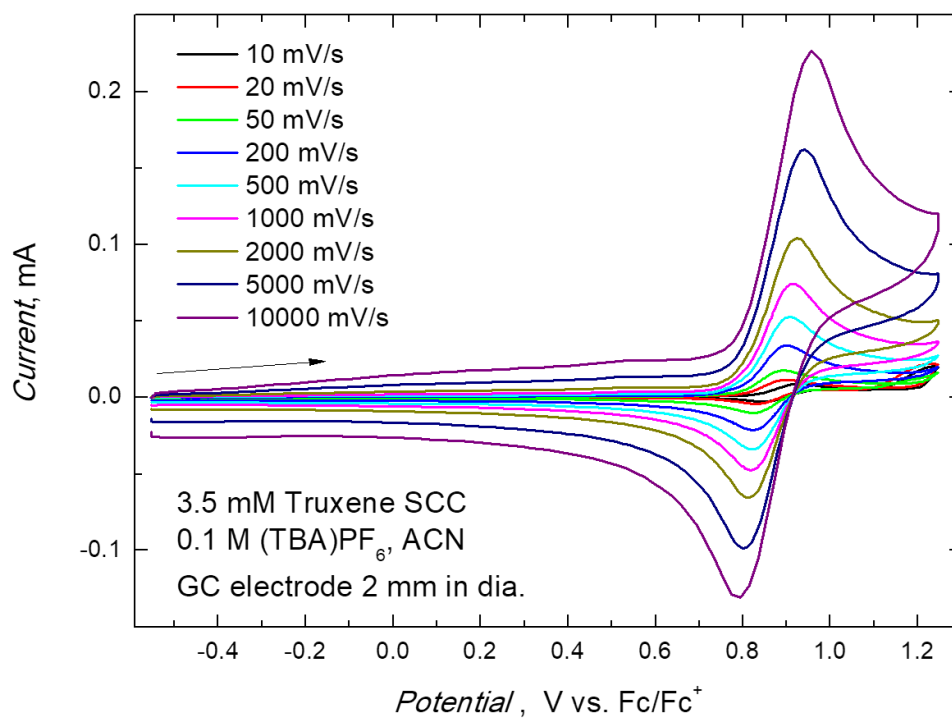

Figure S4. Cyclic voltammograms of **SCC** in 0.1 M (TBA)PF<sub>6</sub> in ACN, at different scan rates.

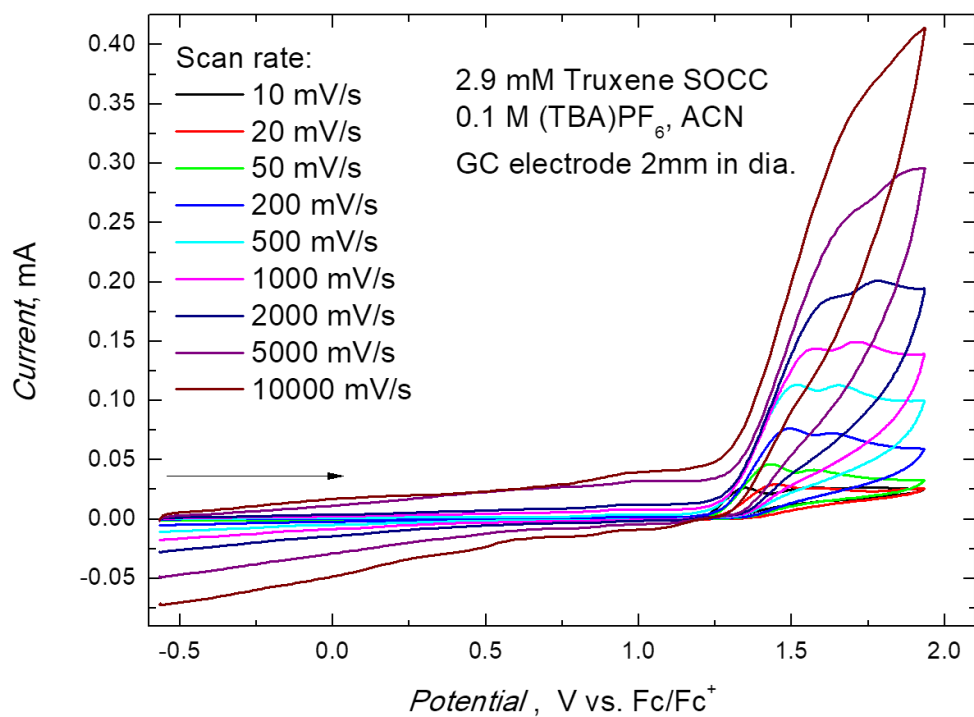

Figure S5. Cyclic voltammograms of **(OS)CC** in 0.1 M (TBA)PF<sub>6</sub> in ACN, at different scan rates.

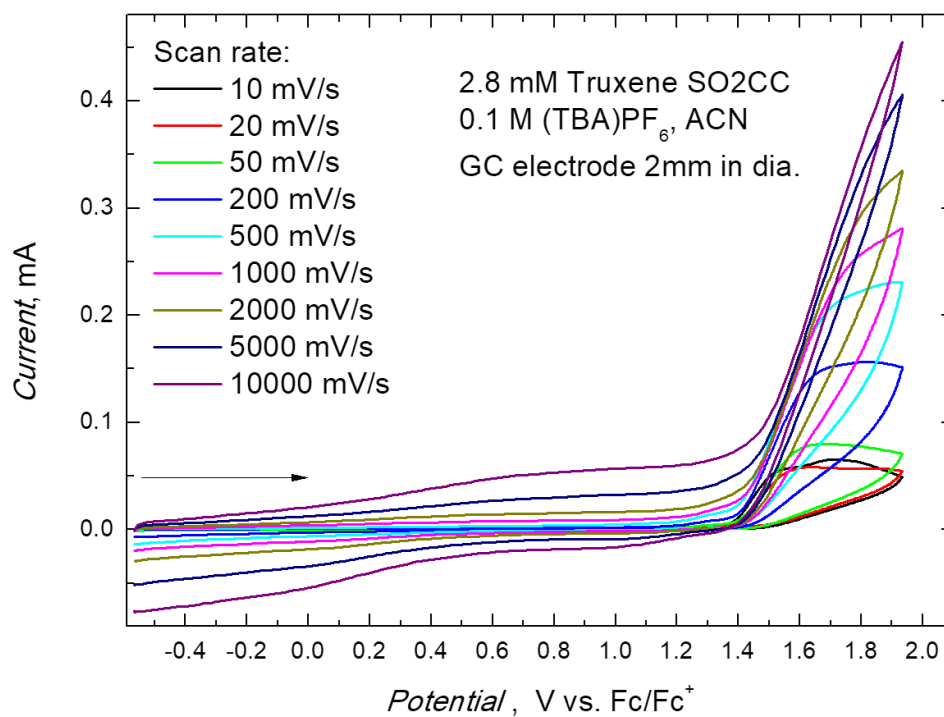

Figure S6. Cyclic voltammograms of  $(\text{O}_2\text{S})\text{CC}$  in 0.1 M  $(\text{TBA})\text{PF}_6$  in ACN, at different scan rates.

#### 4. Reduction of (OS)CC.

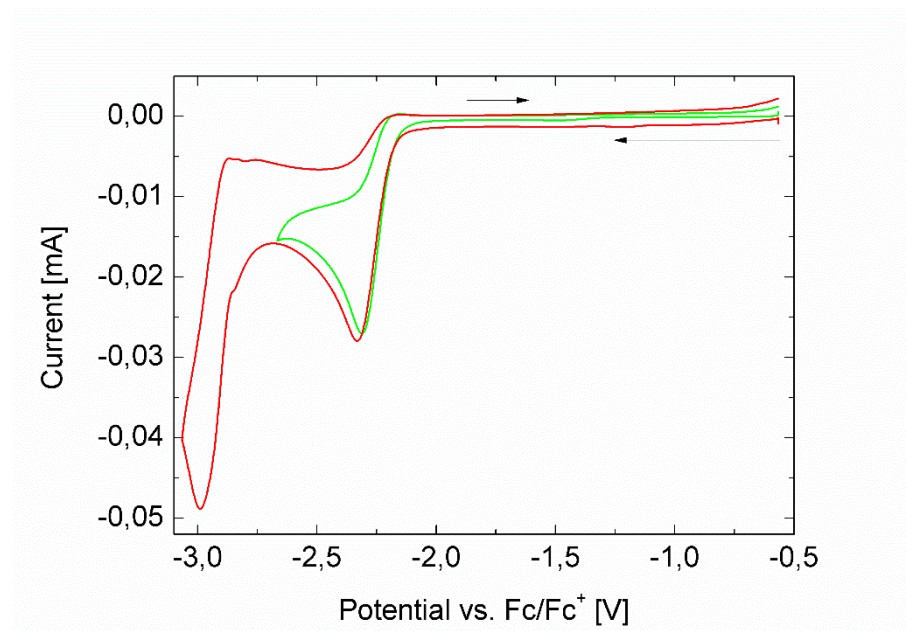

Figure S7 Cyclic voltammograms of (OS)CC in 0.1 M (TBA)PF<sub>6</sub> in ACN, scan rate 100 mV/s.

#### 5. Spectral radiation distribution of the UV-C lamp

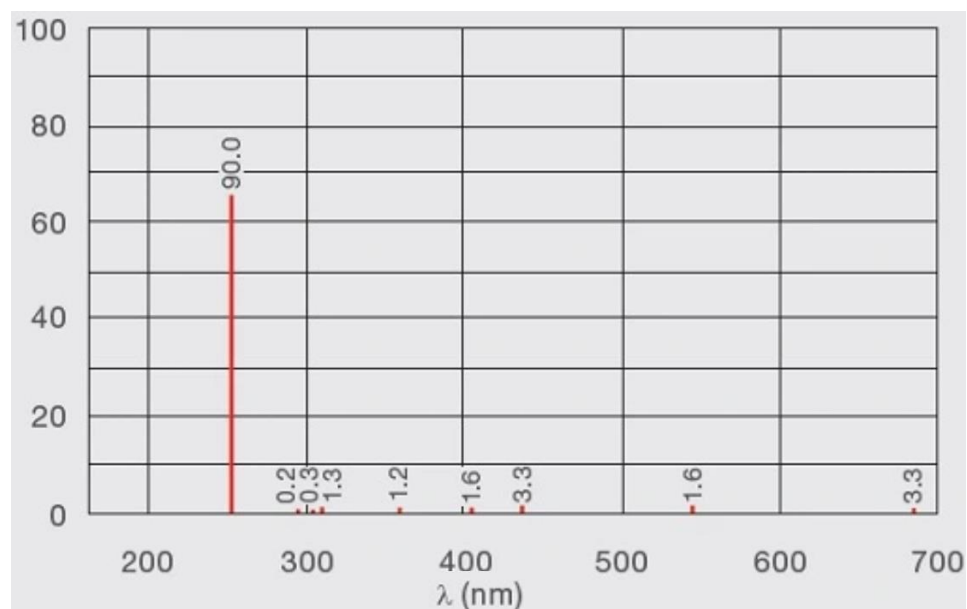

Figure S8 Spectral radiation distribution of the OSRAM UV-C lamp Puritec HNS L 2G11, 55.

## 6. NMR spectra of 5 in CD<sub>2</sub>Cl<sub>2</sub>

<sup>1</sup>H NMR of 5 in CD<sub>2</sub>Cl<sub>2</sub> 500 MHz

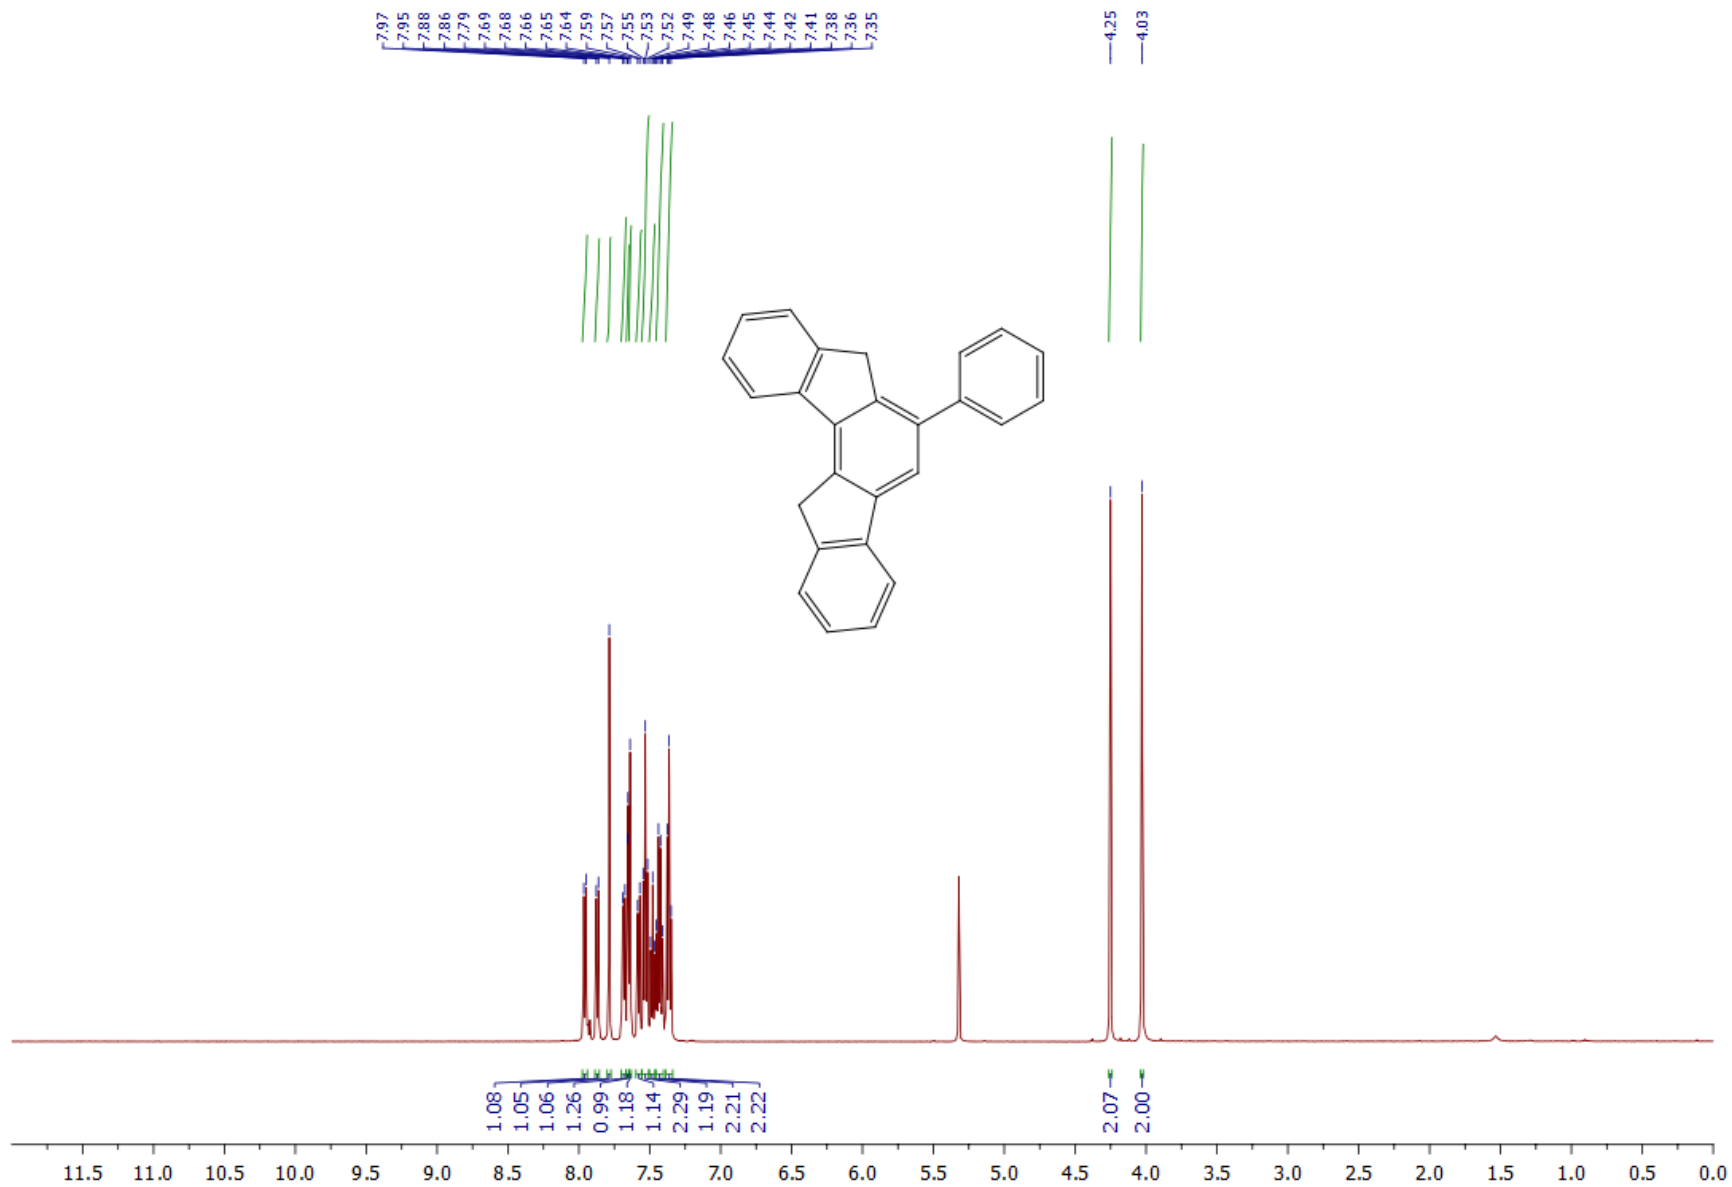

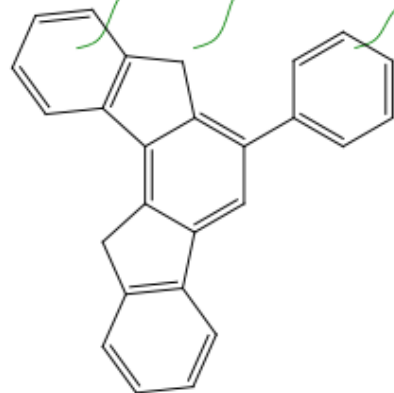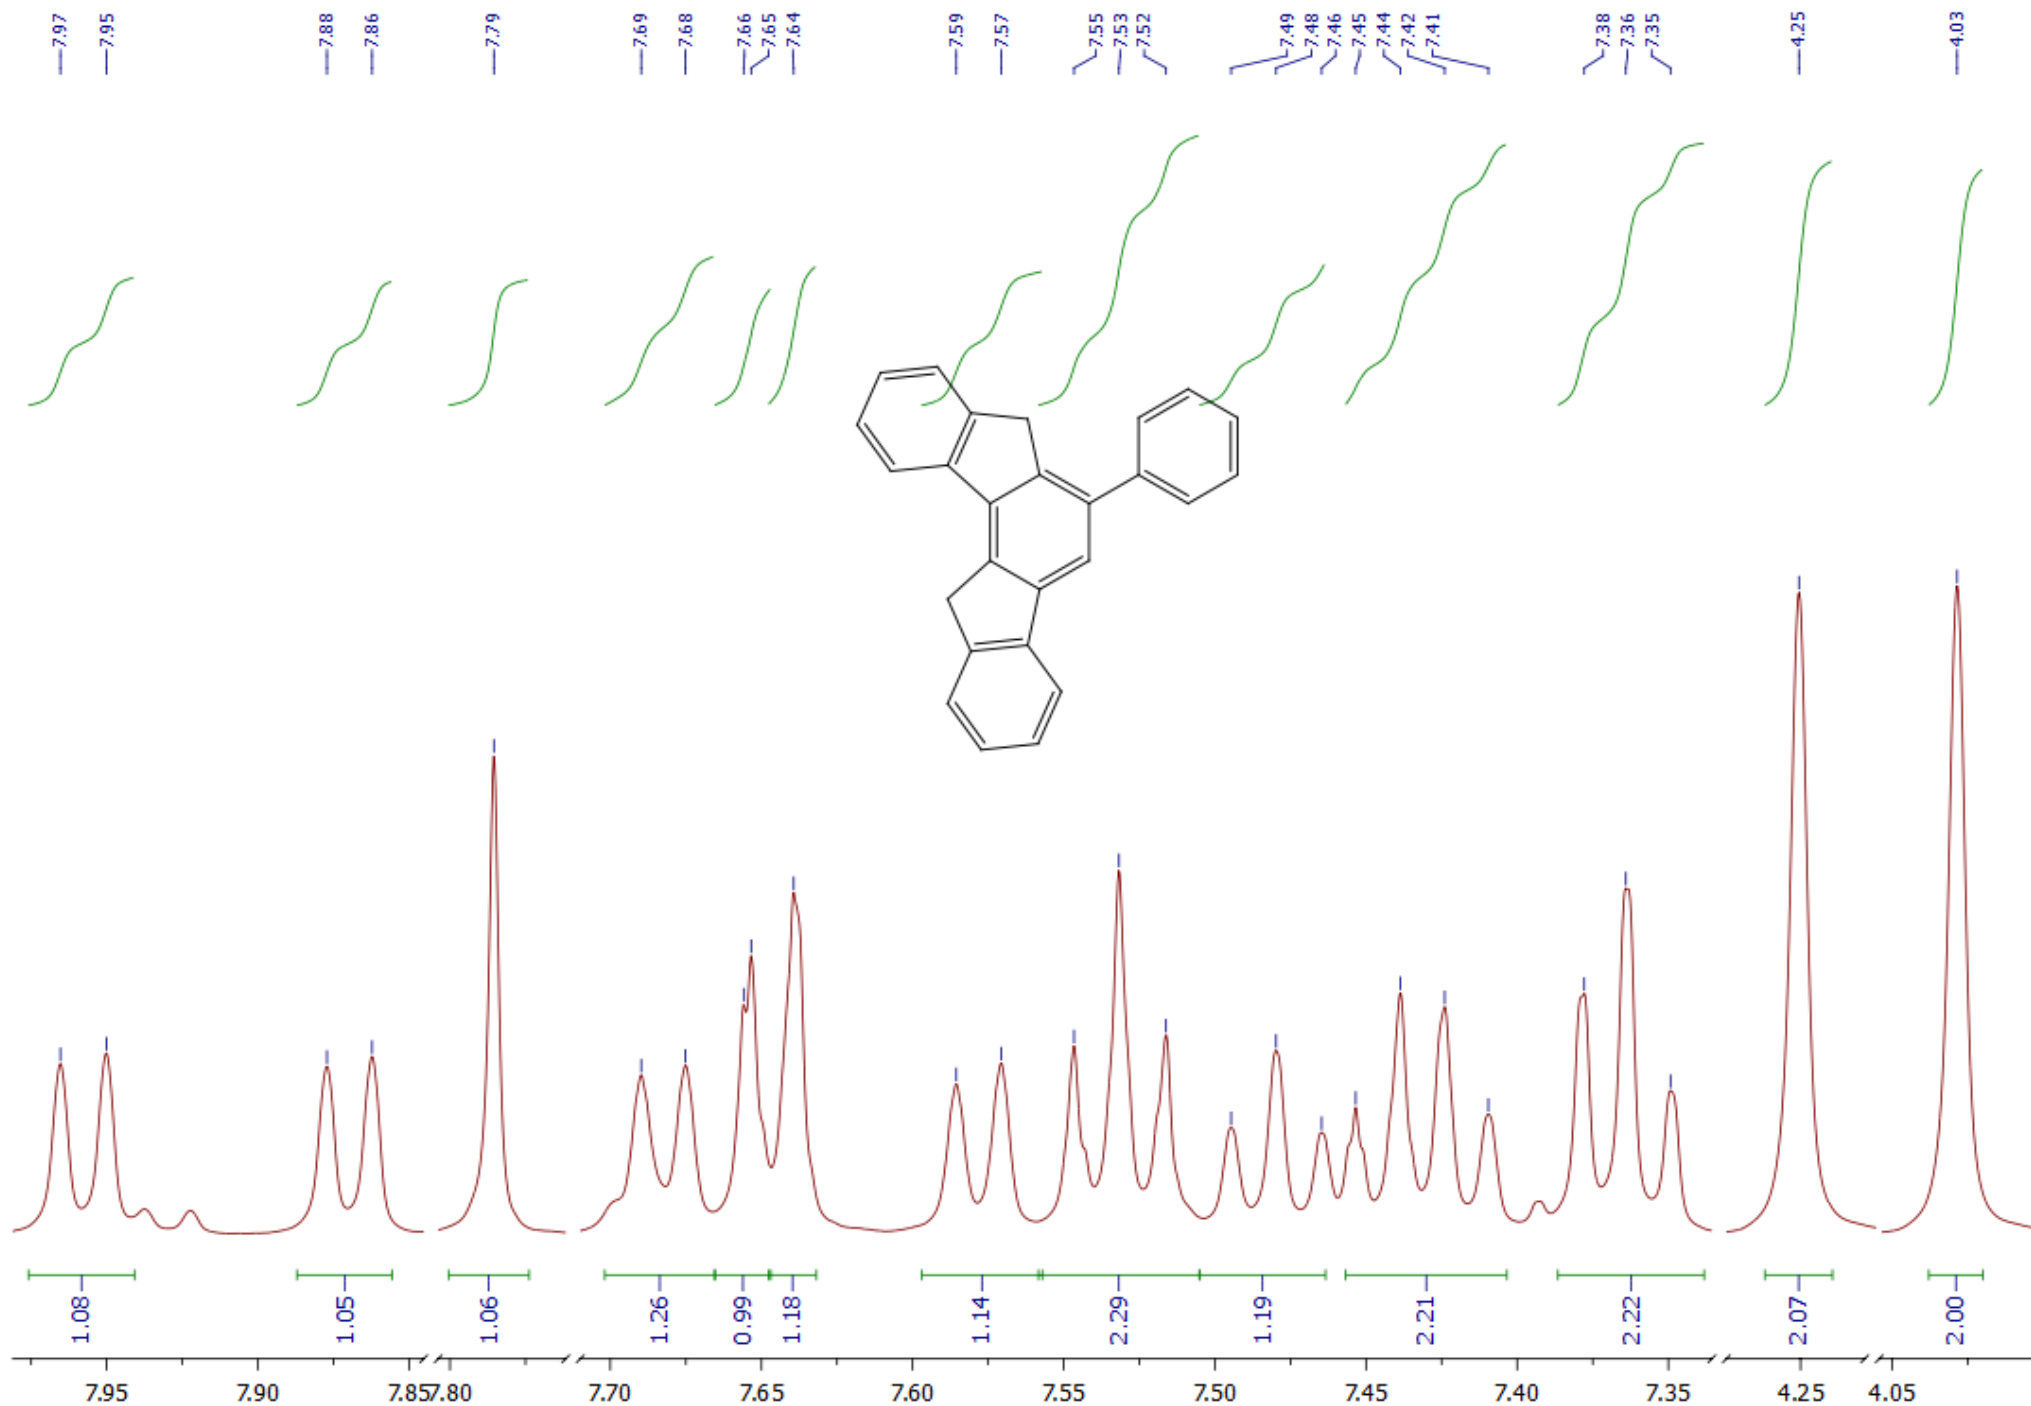



$^{13}\text{C}$   $\{^1\text{H}\}$  NMR spectra of **5** in  $\text{CD}_2\text{Cl}_2$  126 MHz

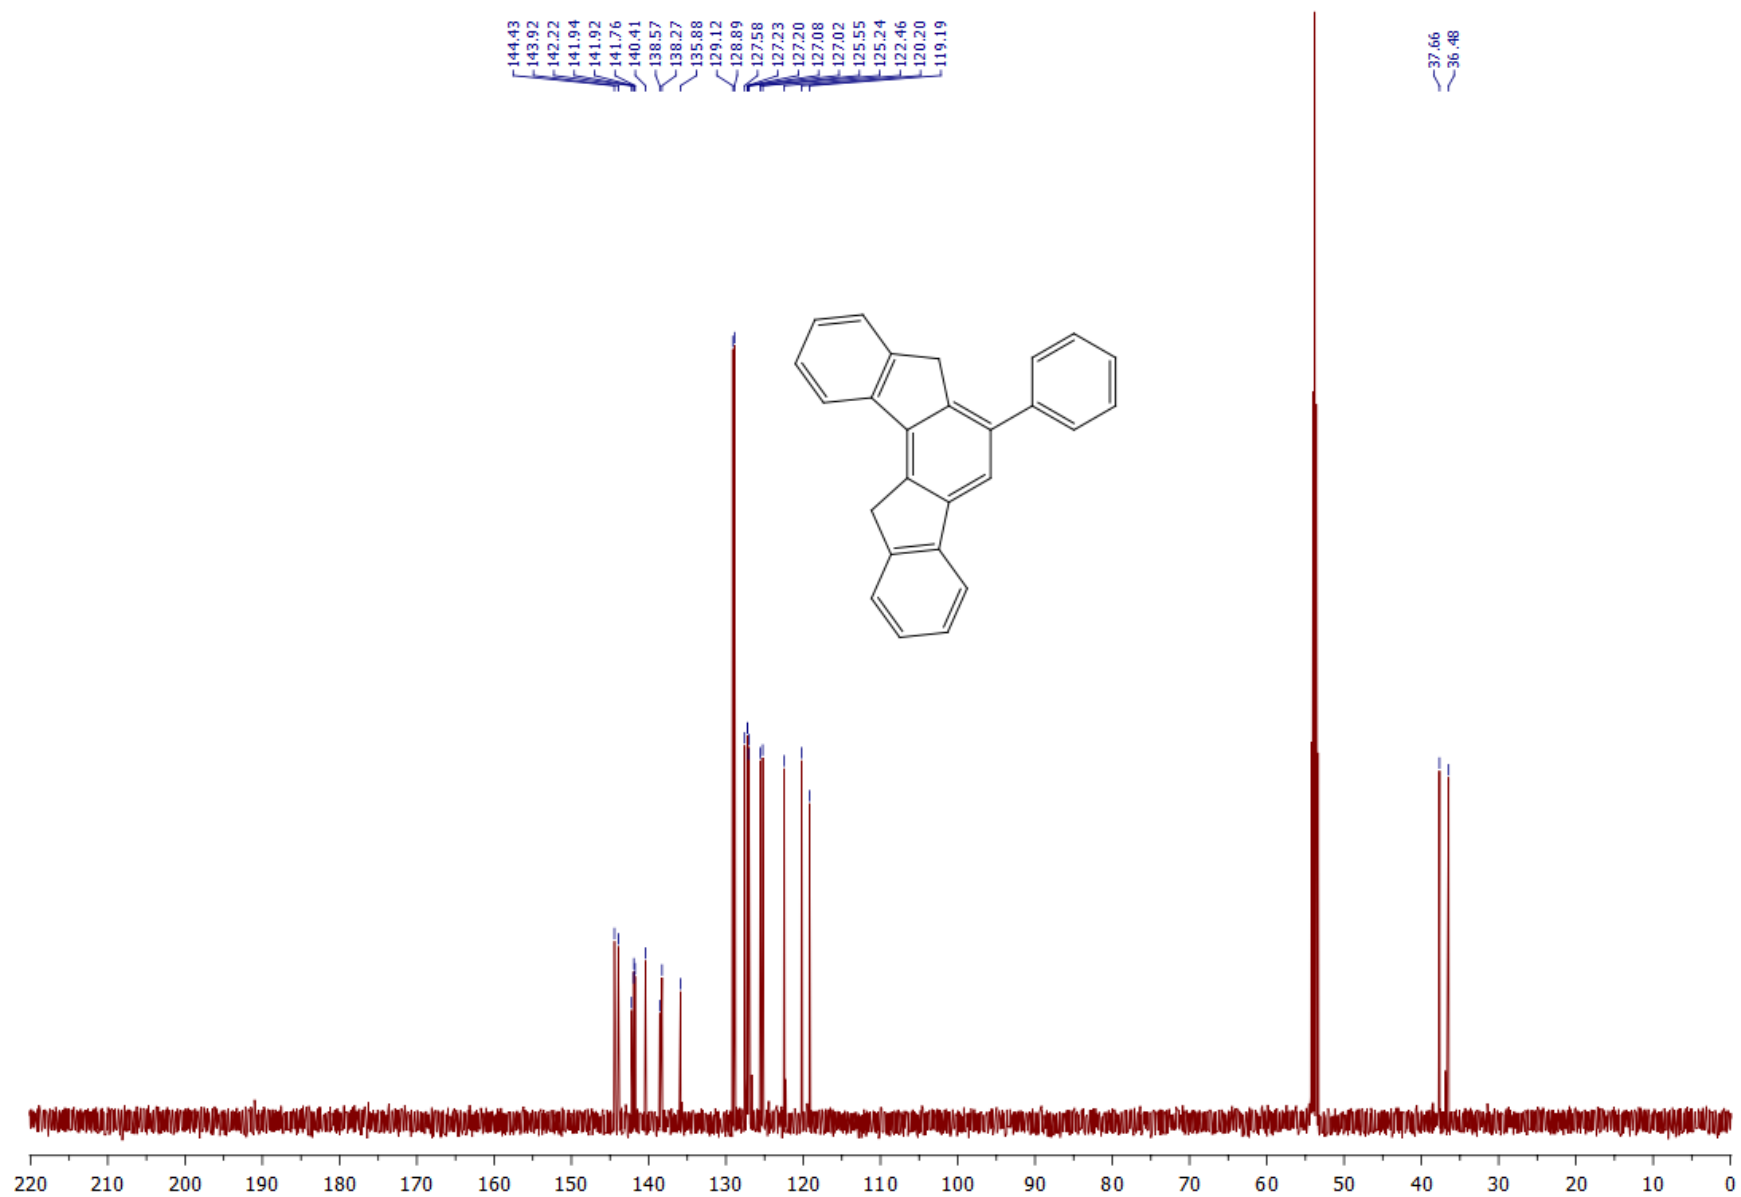

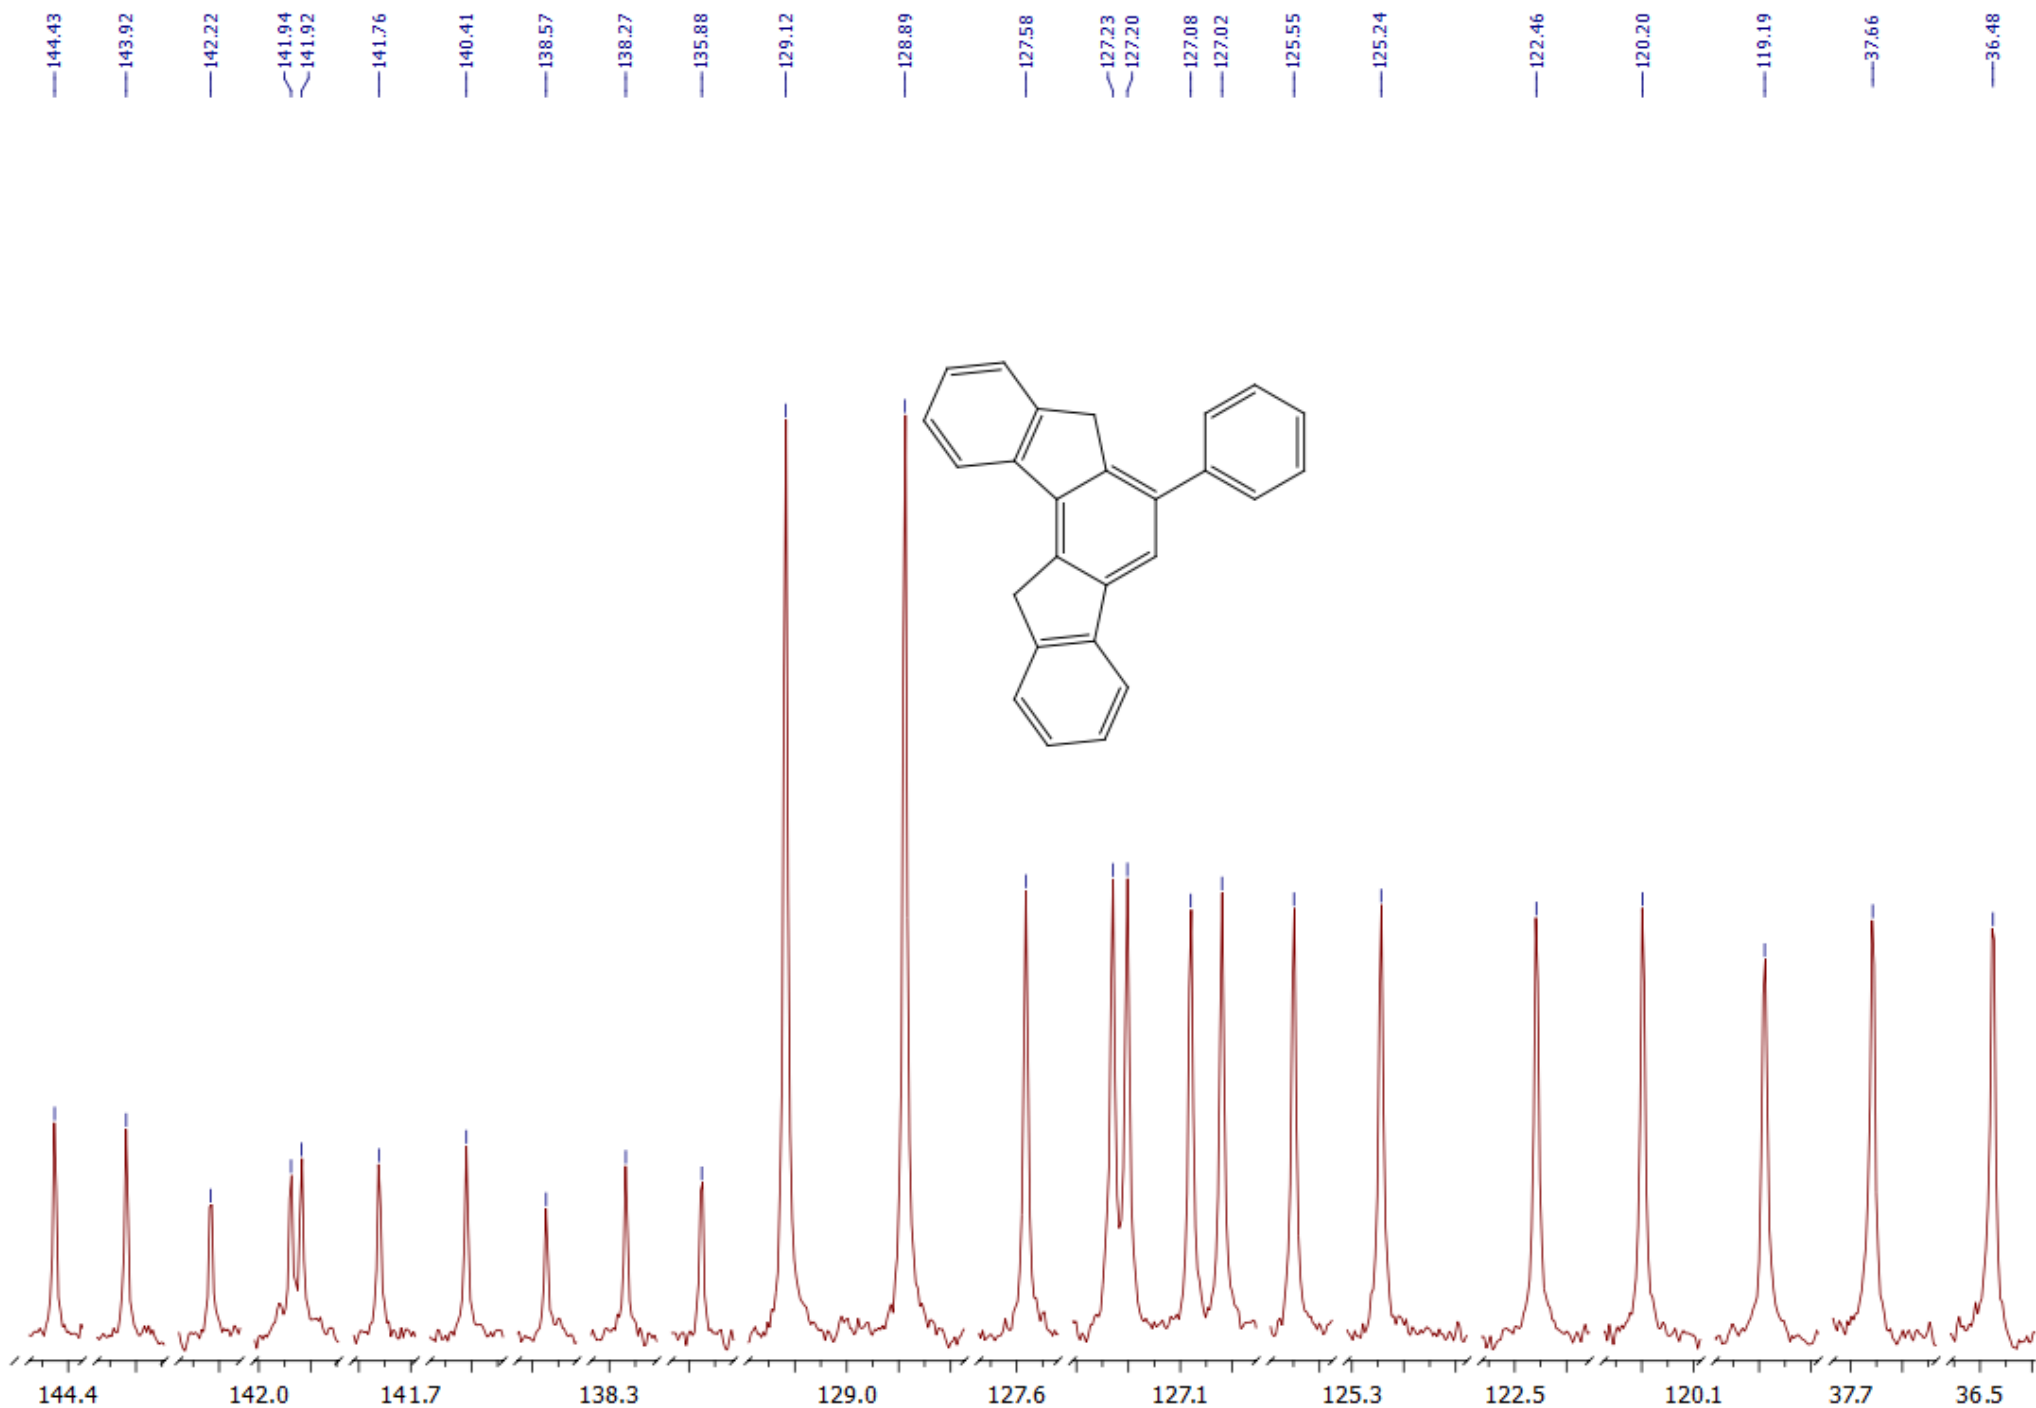

## 7. NMR spectra of 6 in CDCl<sub>3</sub>

<sup>1</sup>H NMR of 6 in CDCl<sub>3</sub> 500 MHz

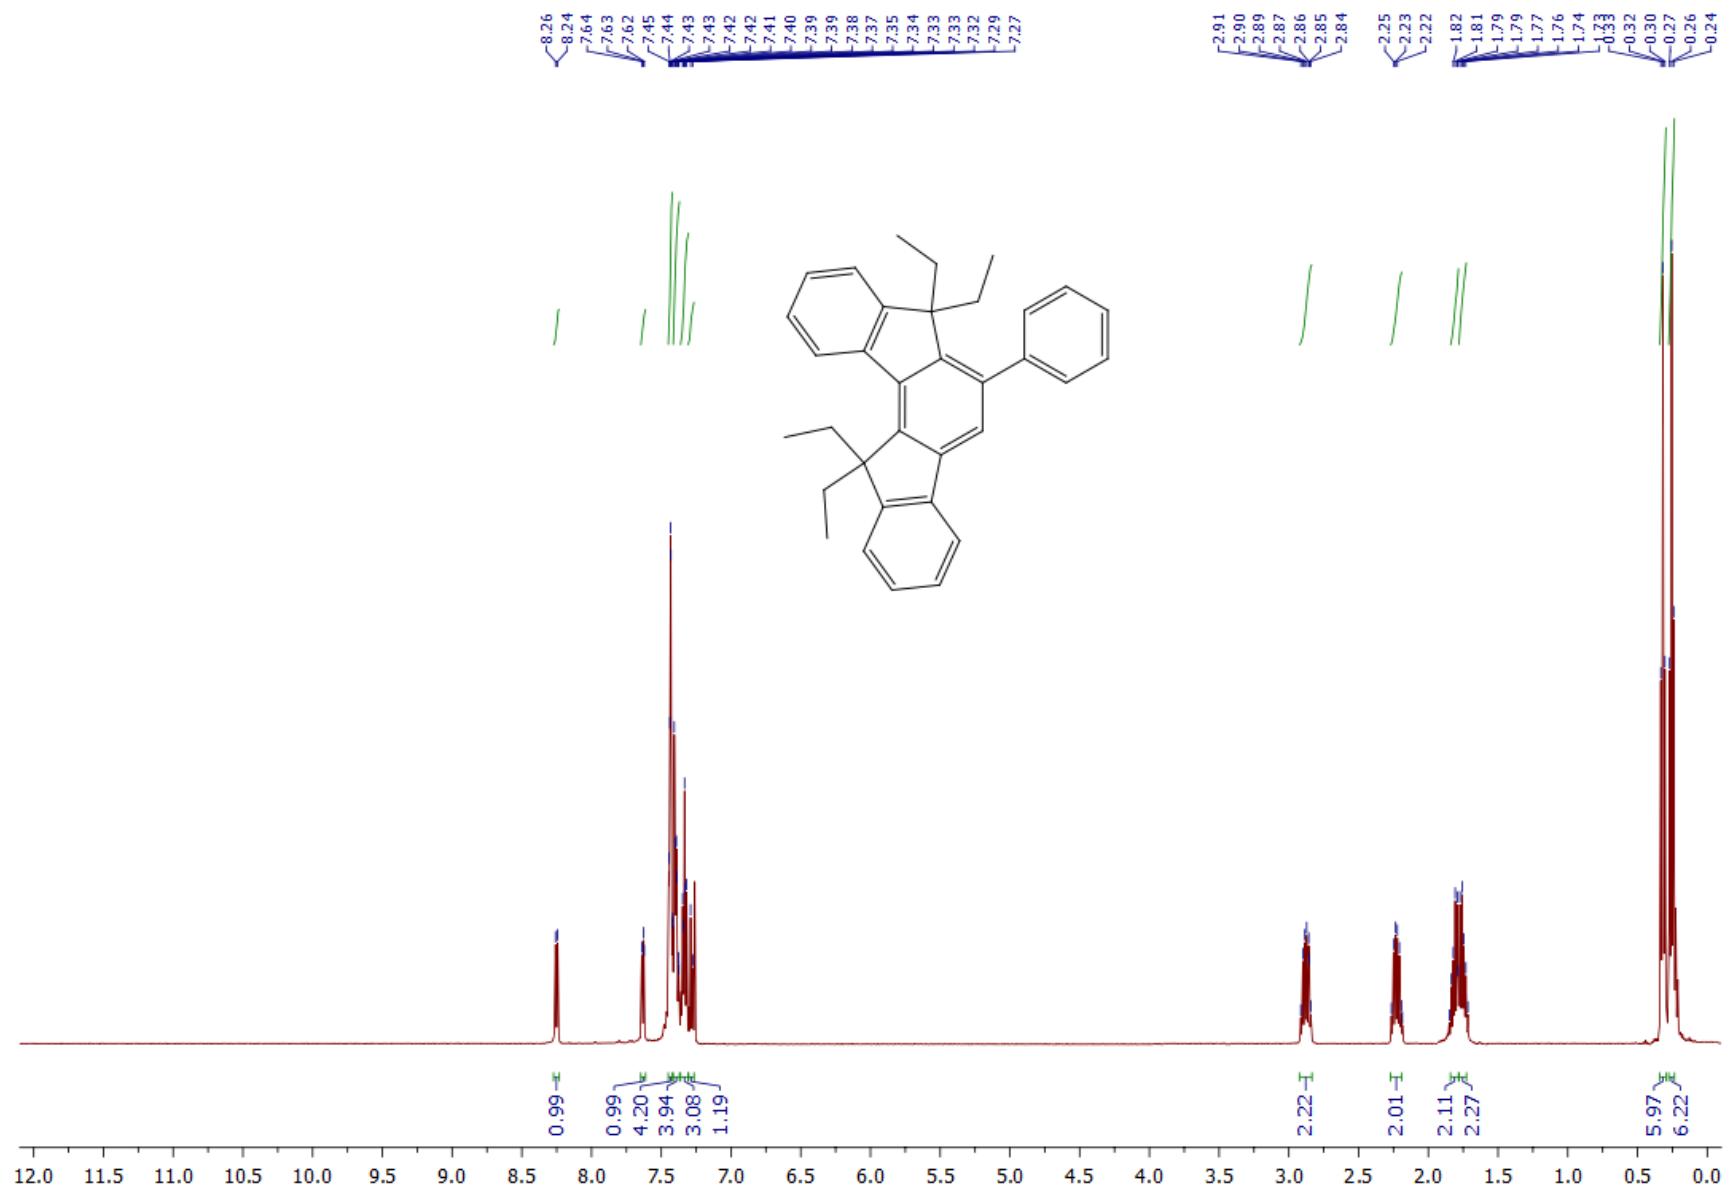

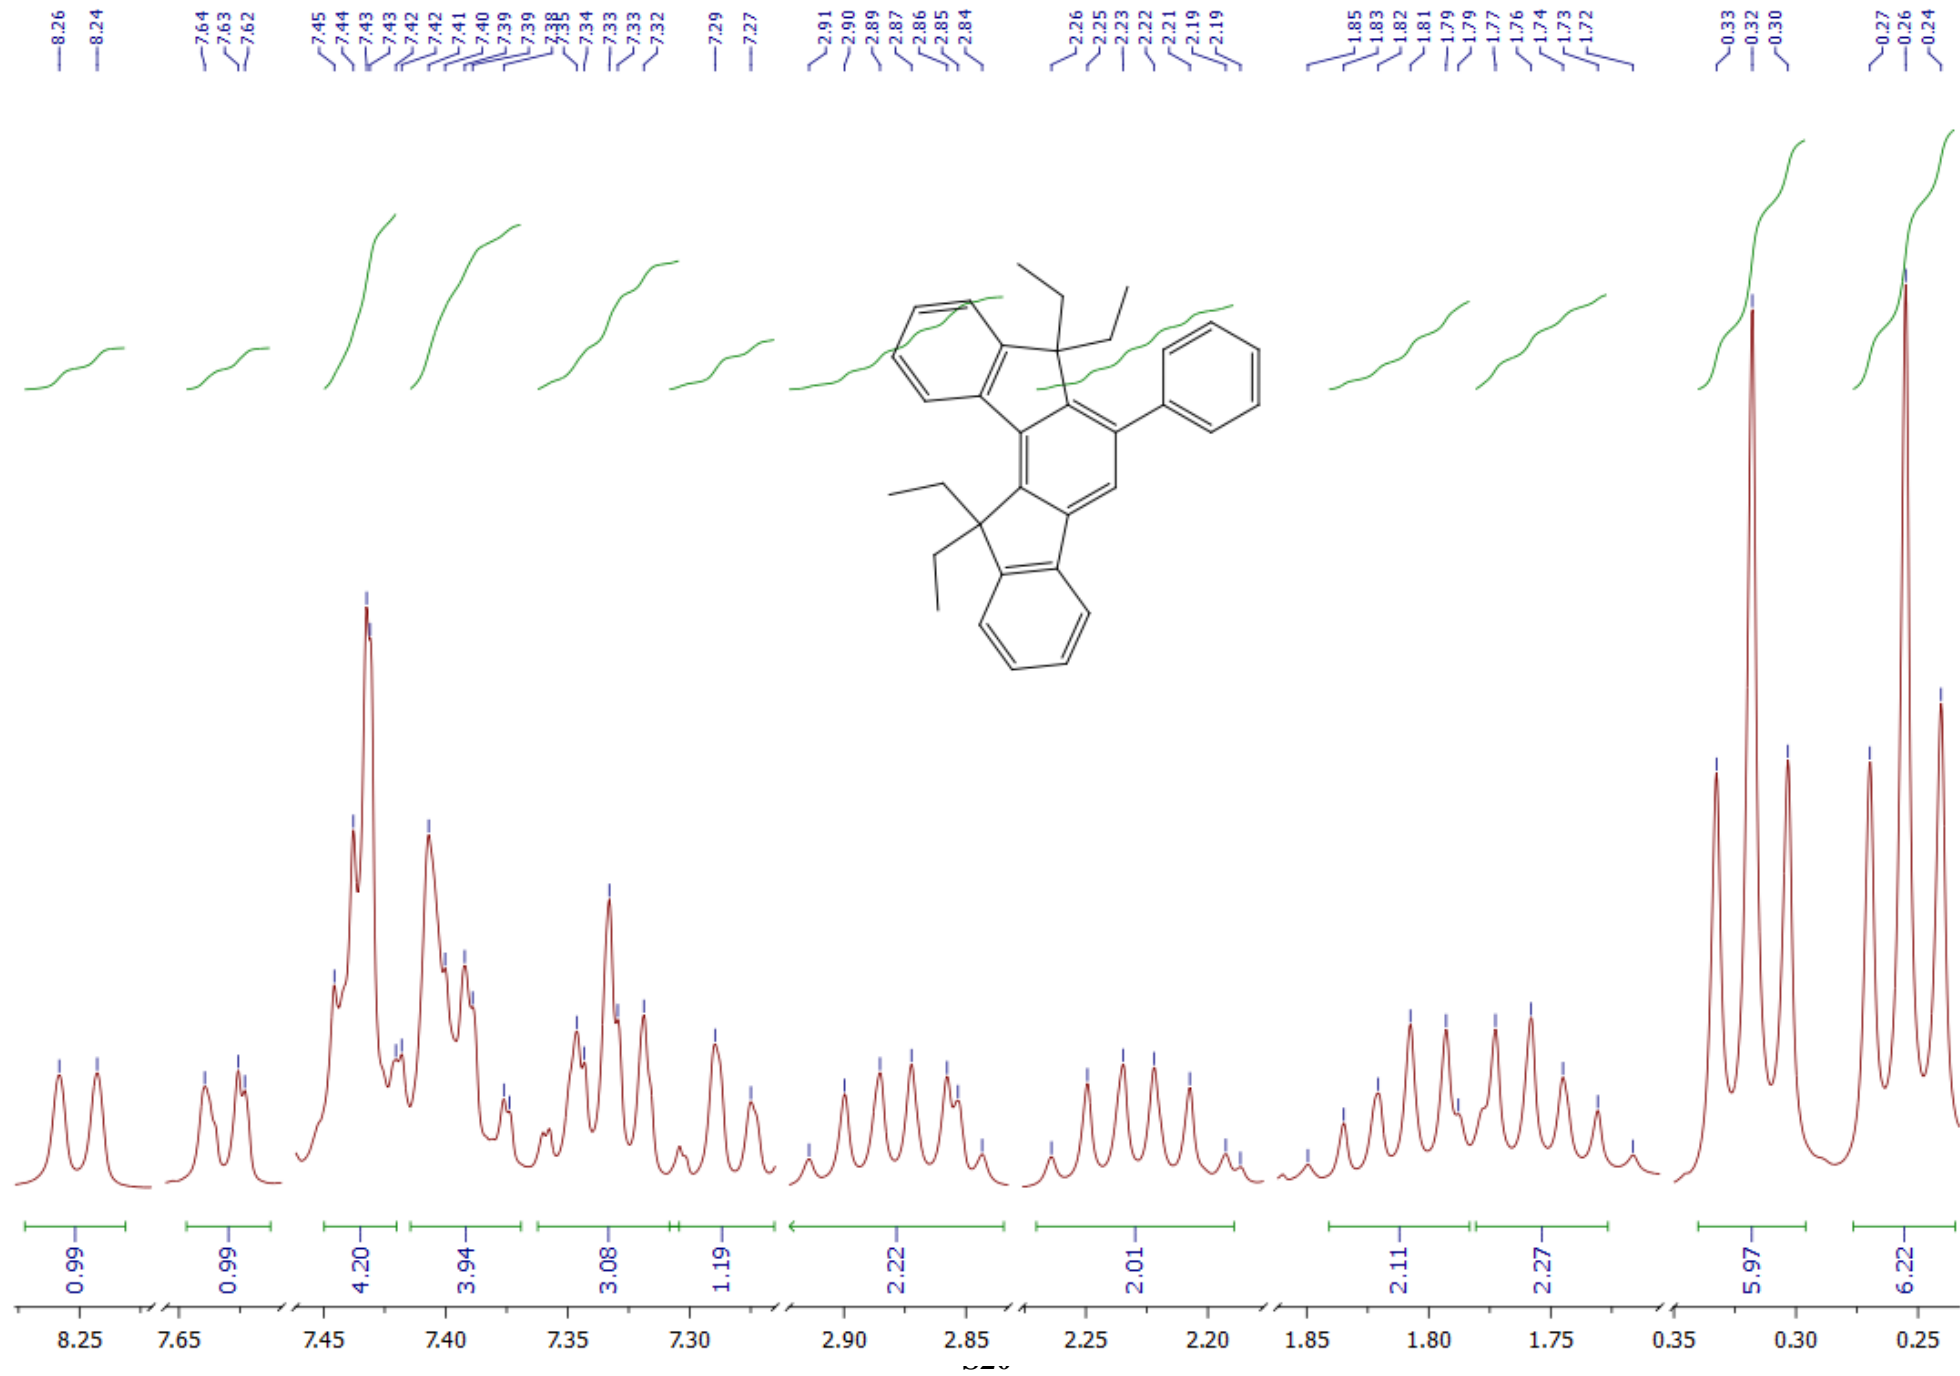

$^{13}\text{C}$   $\{^1\text{H}\}$  NMR spectra of **6** in  $\text{CDCl}_3$  126 MHz

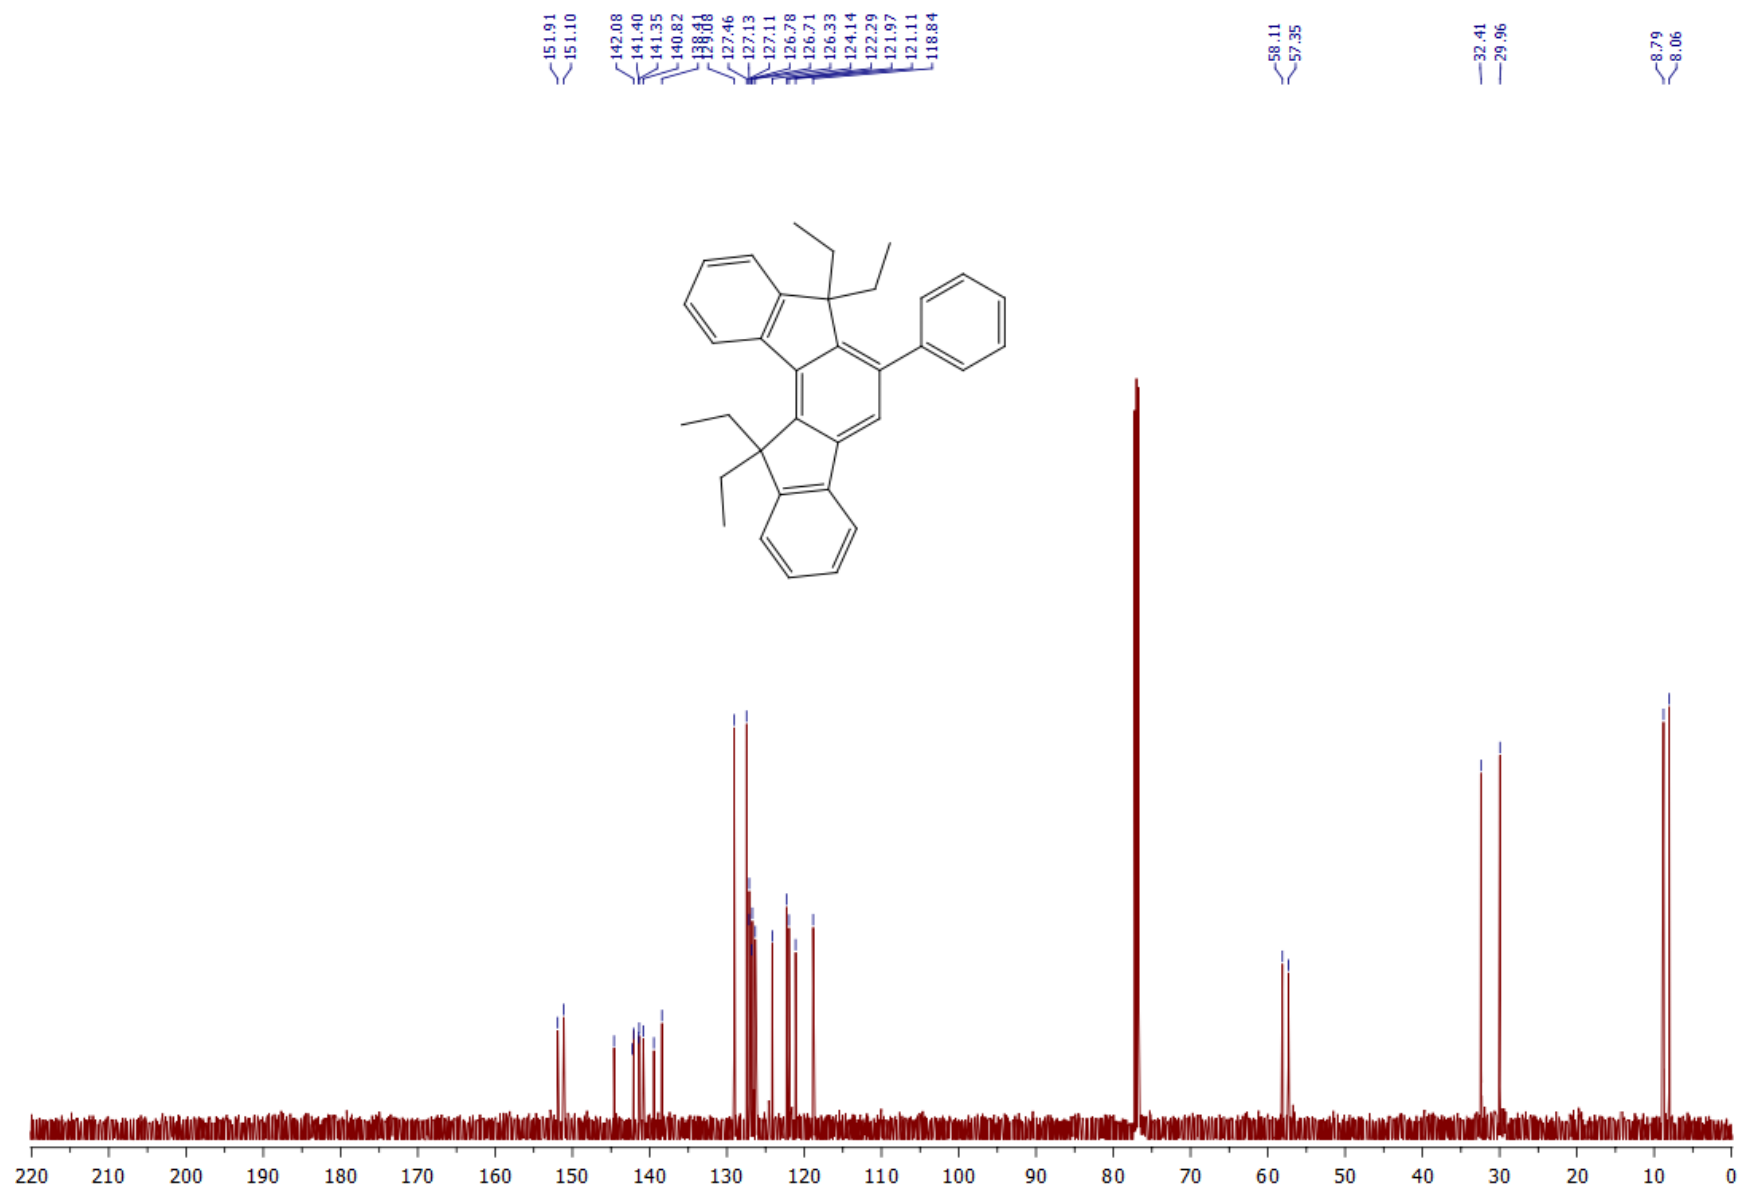

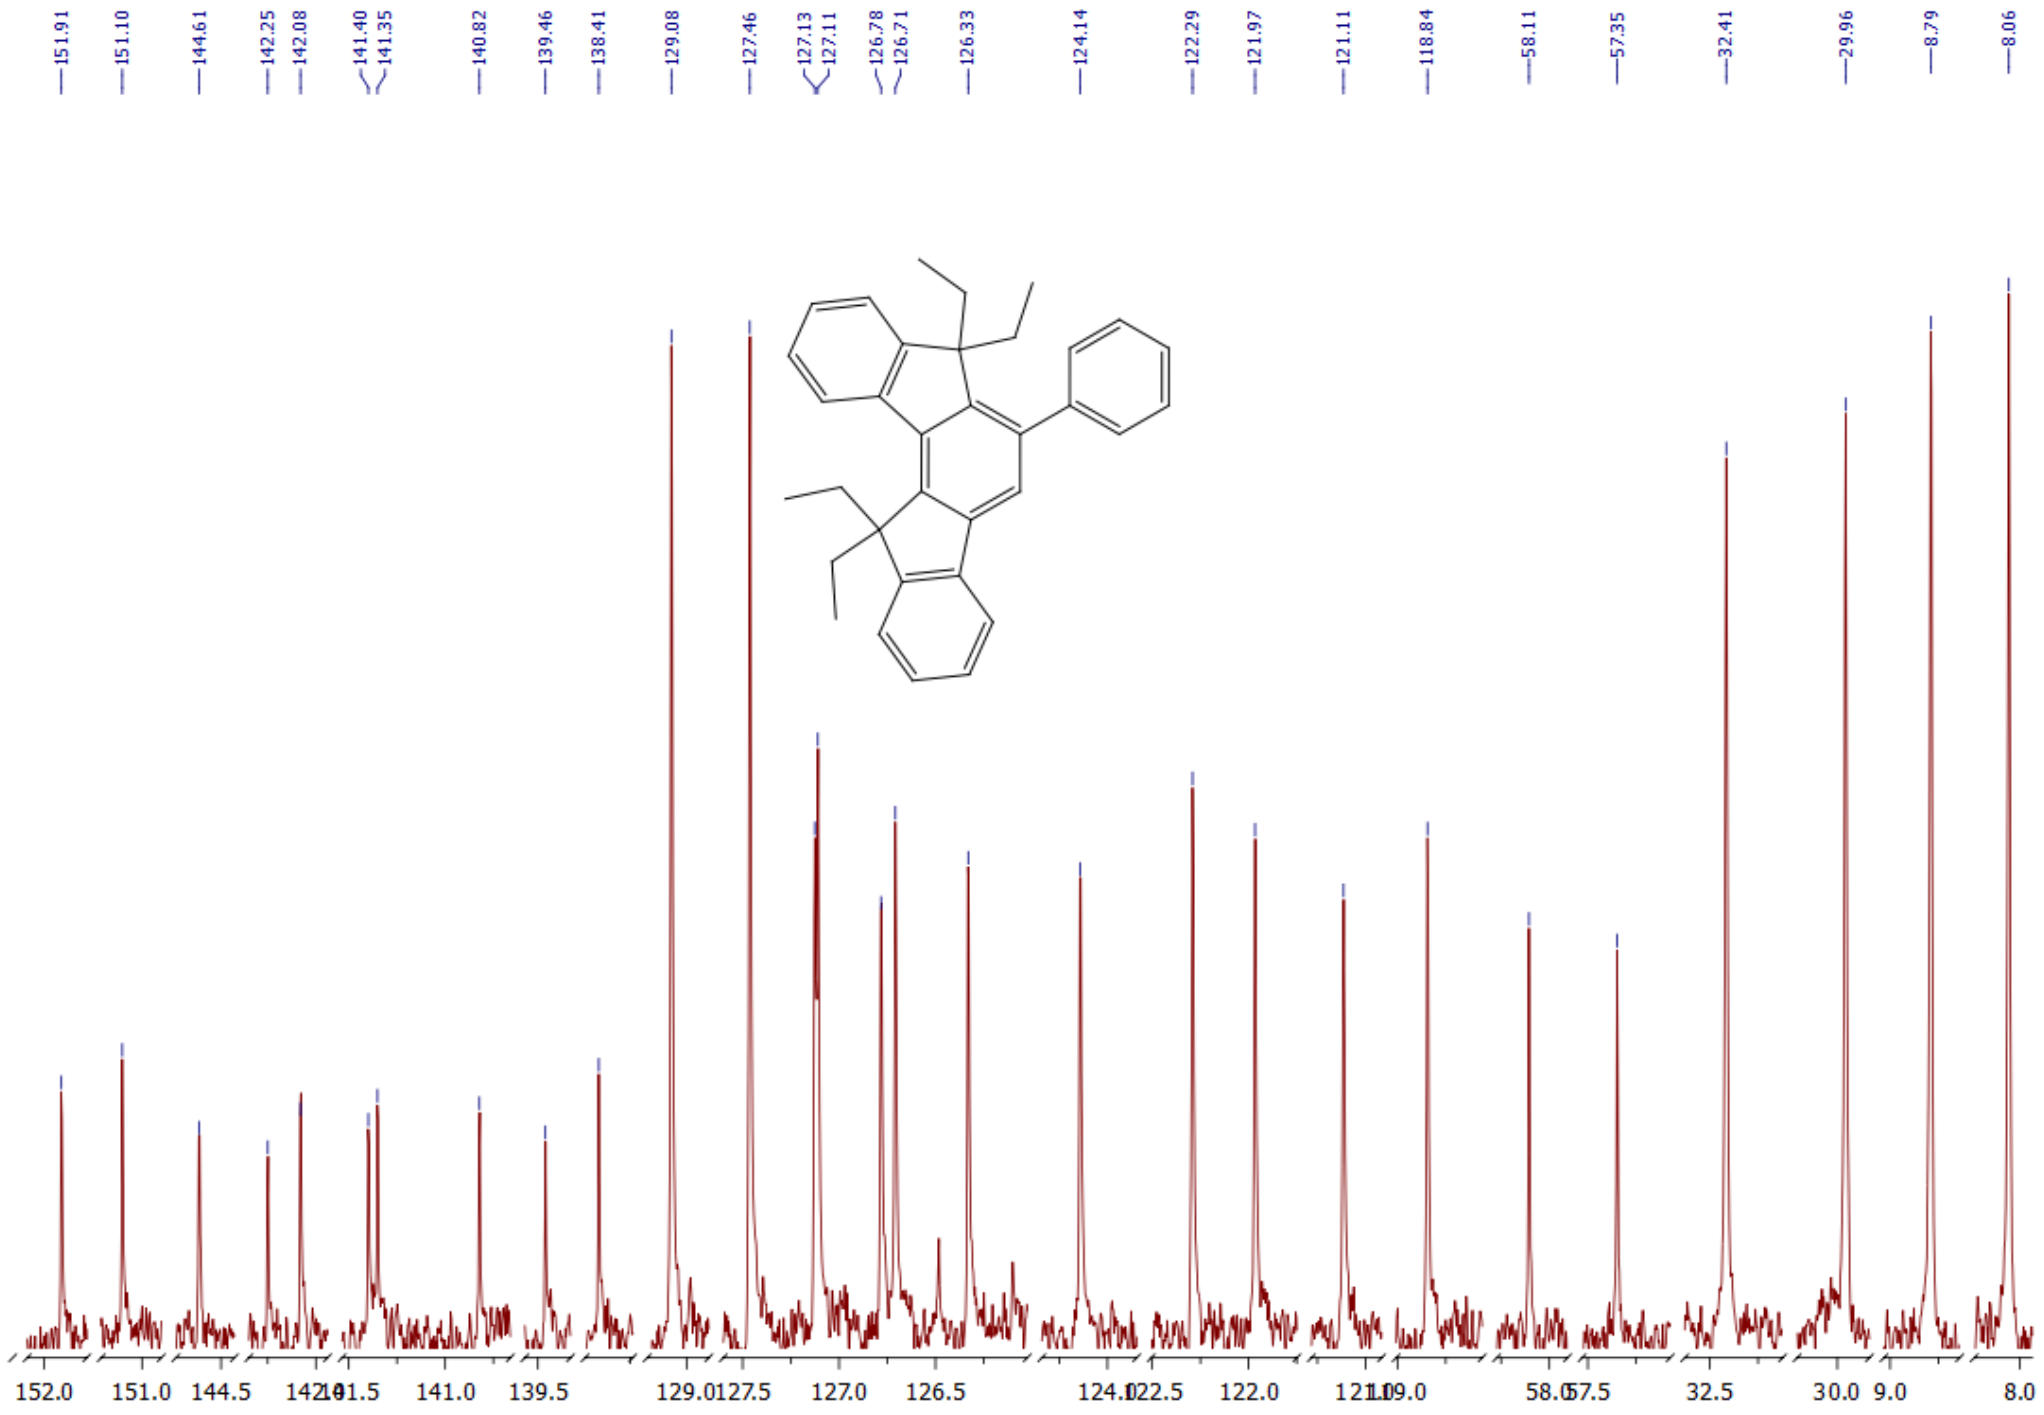

## 8. NMR spectra of 7 in CDCl<sub>3</sub>

<sup>1</sup>H NMR of 7 in CDCl<sub>3</sub> 500 MHz

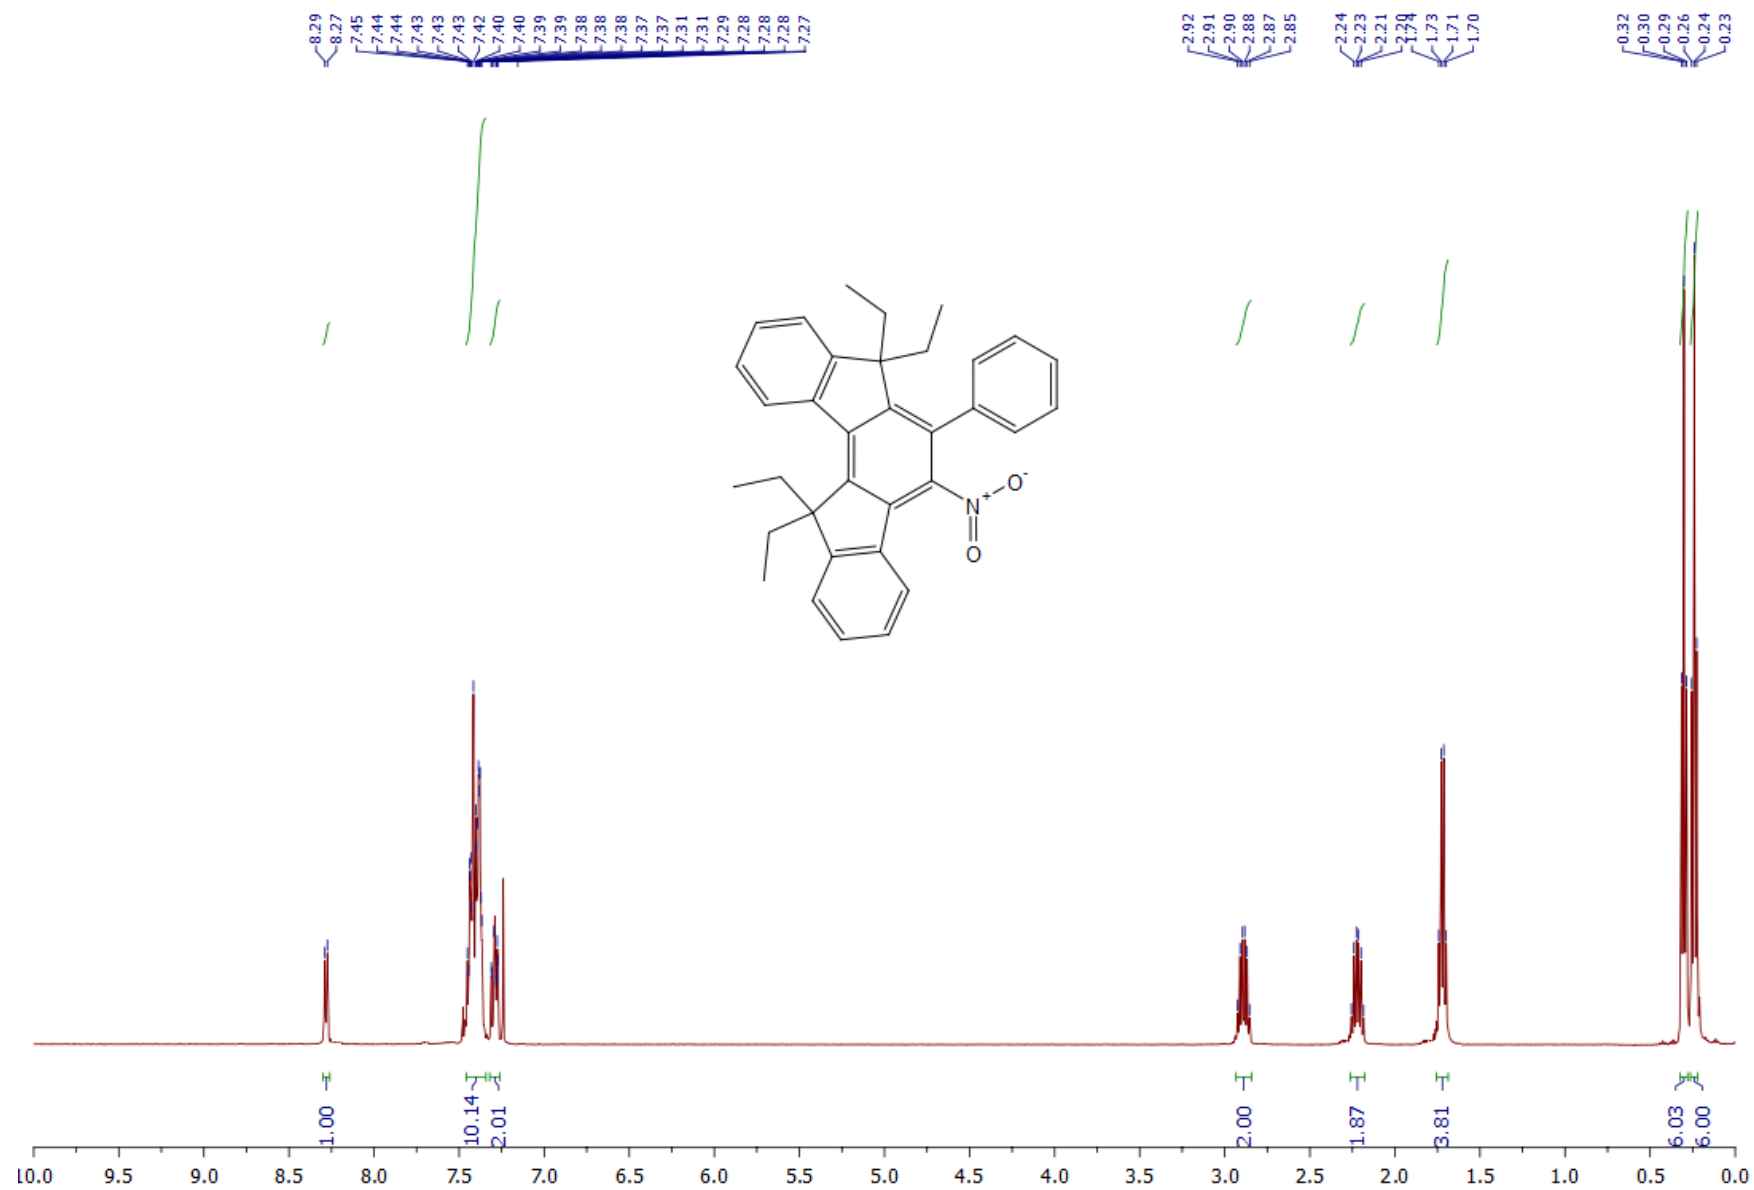

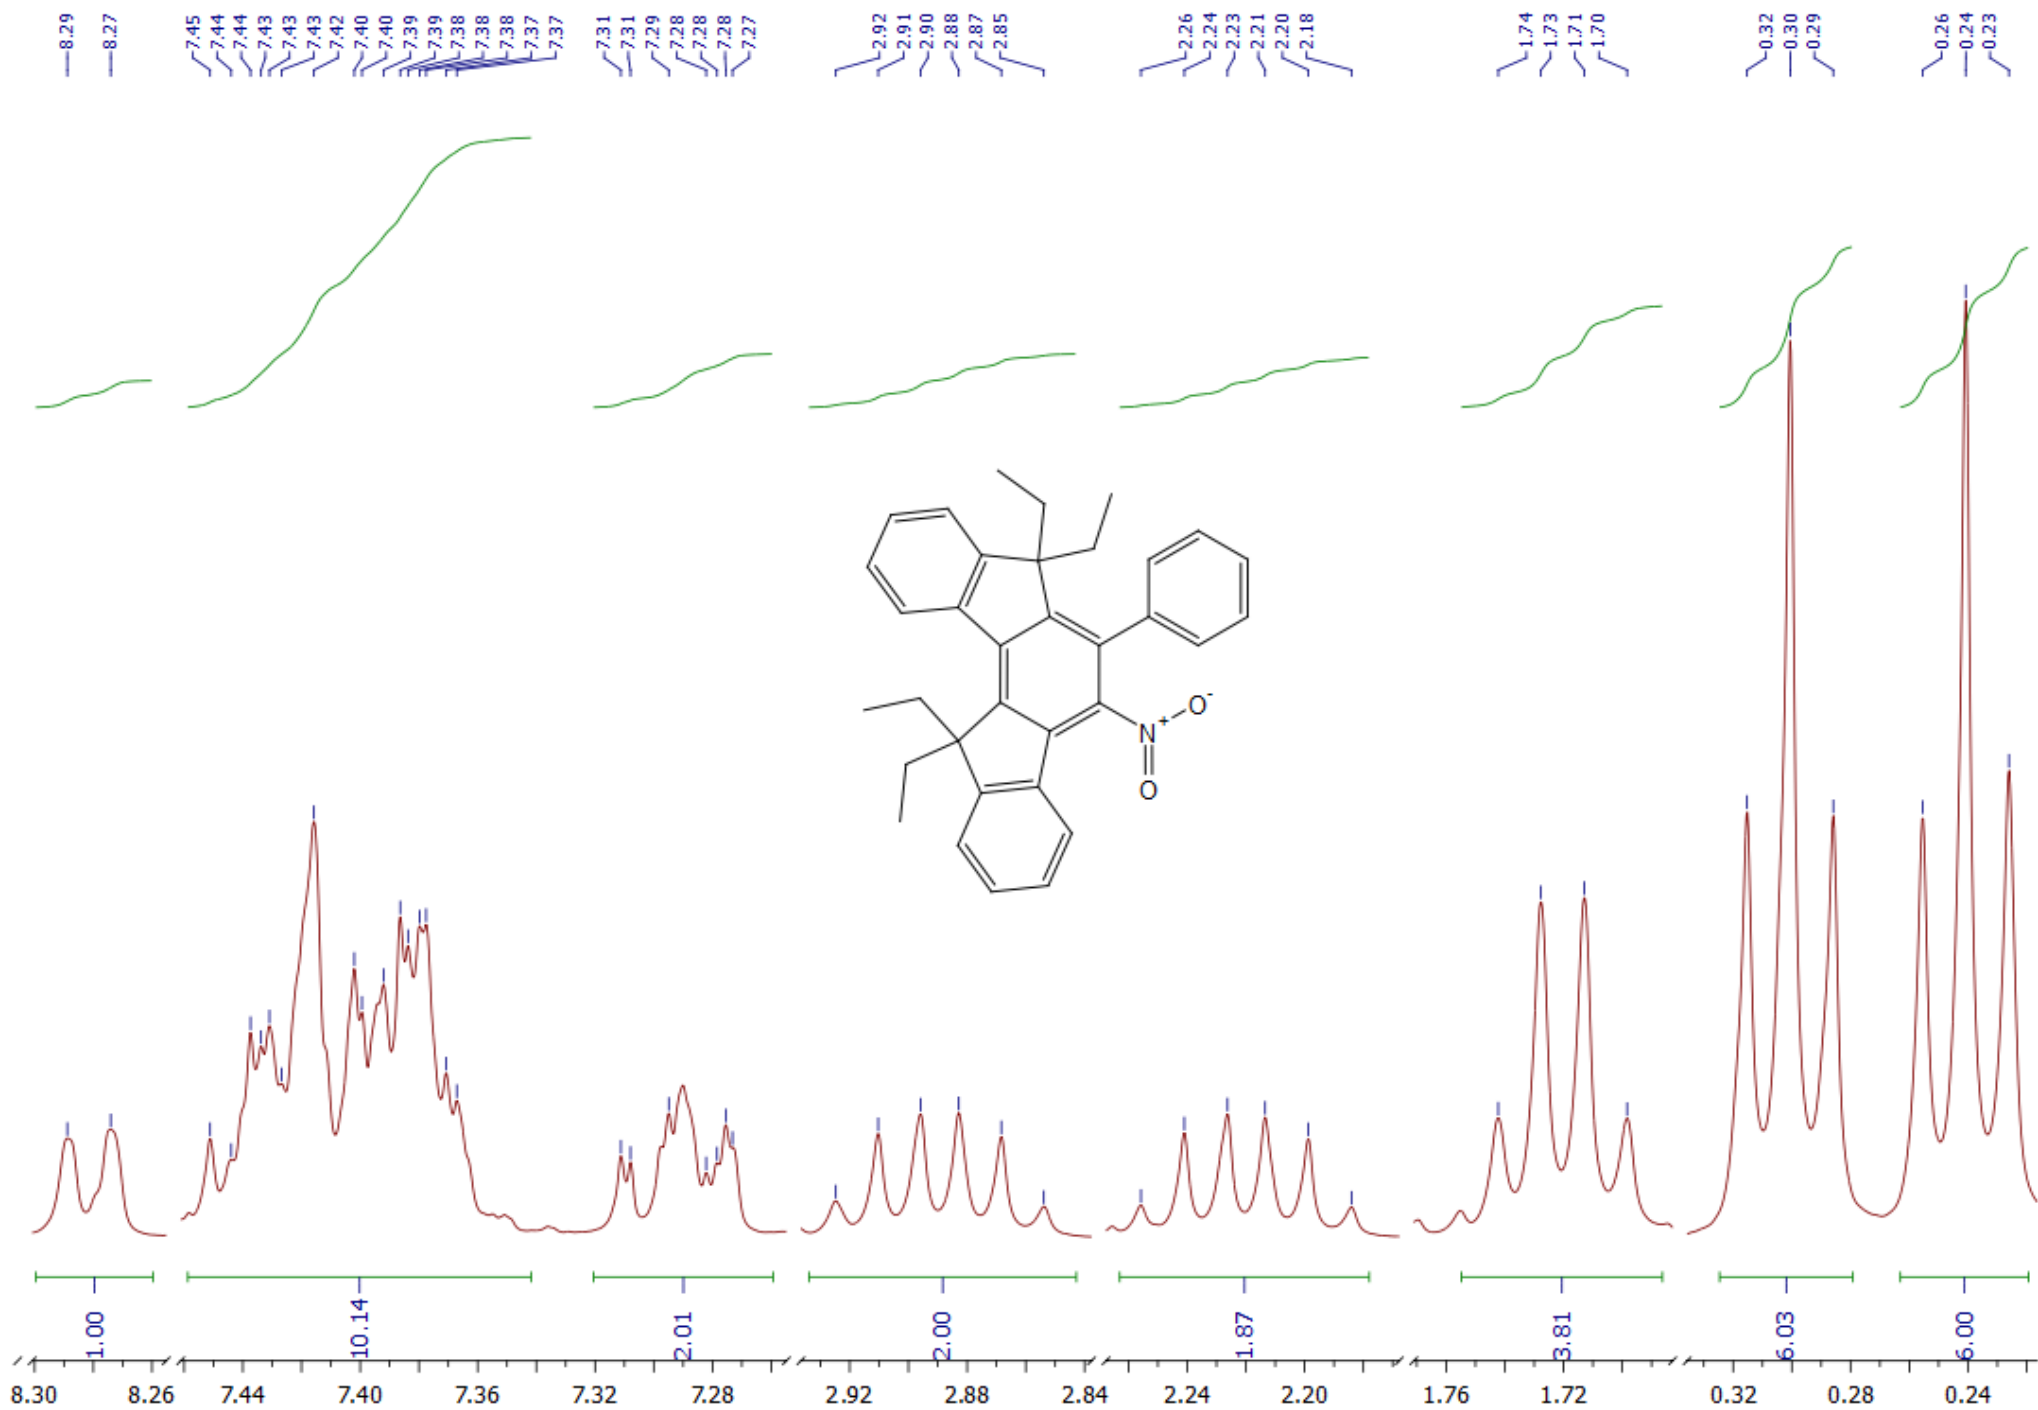



$^{13}\text{C}$   $\{^1\text{H}\}$  NMR spectra of **7** in  $\text{CDCl}_3$  126 MHz

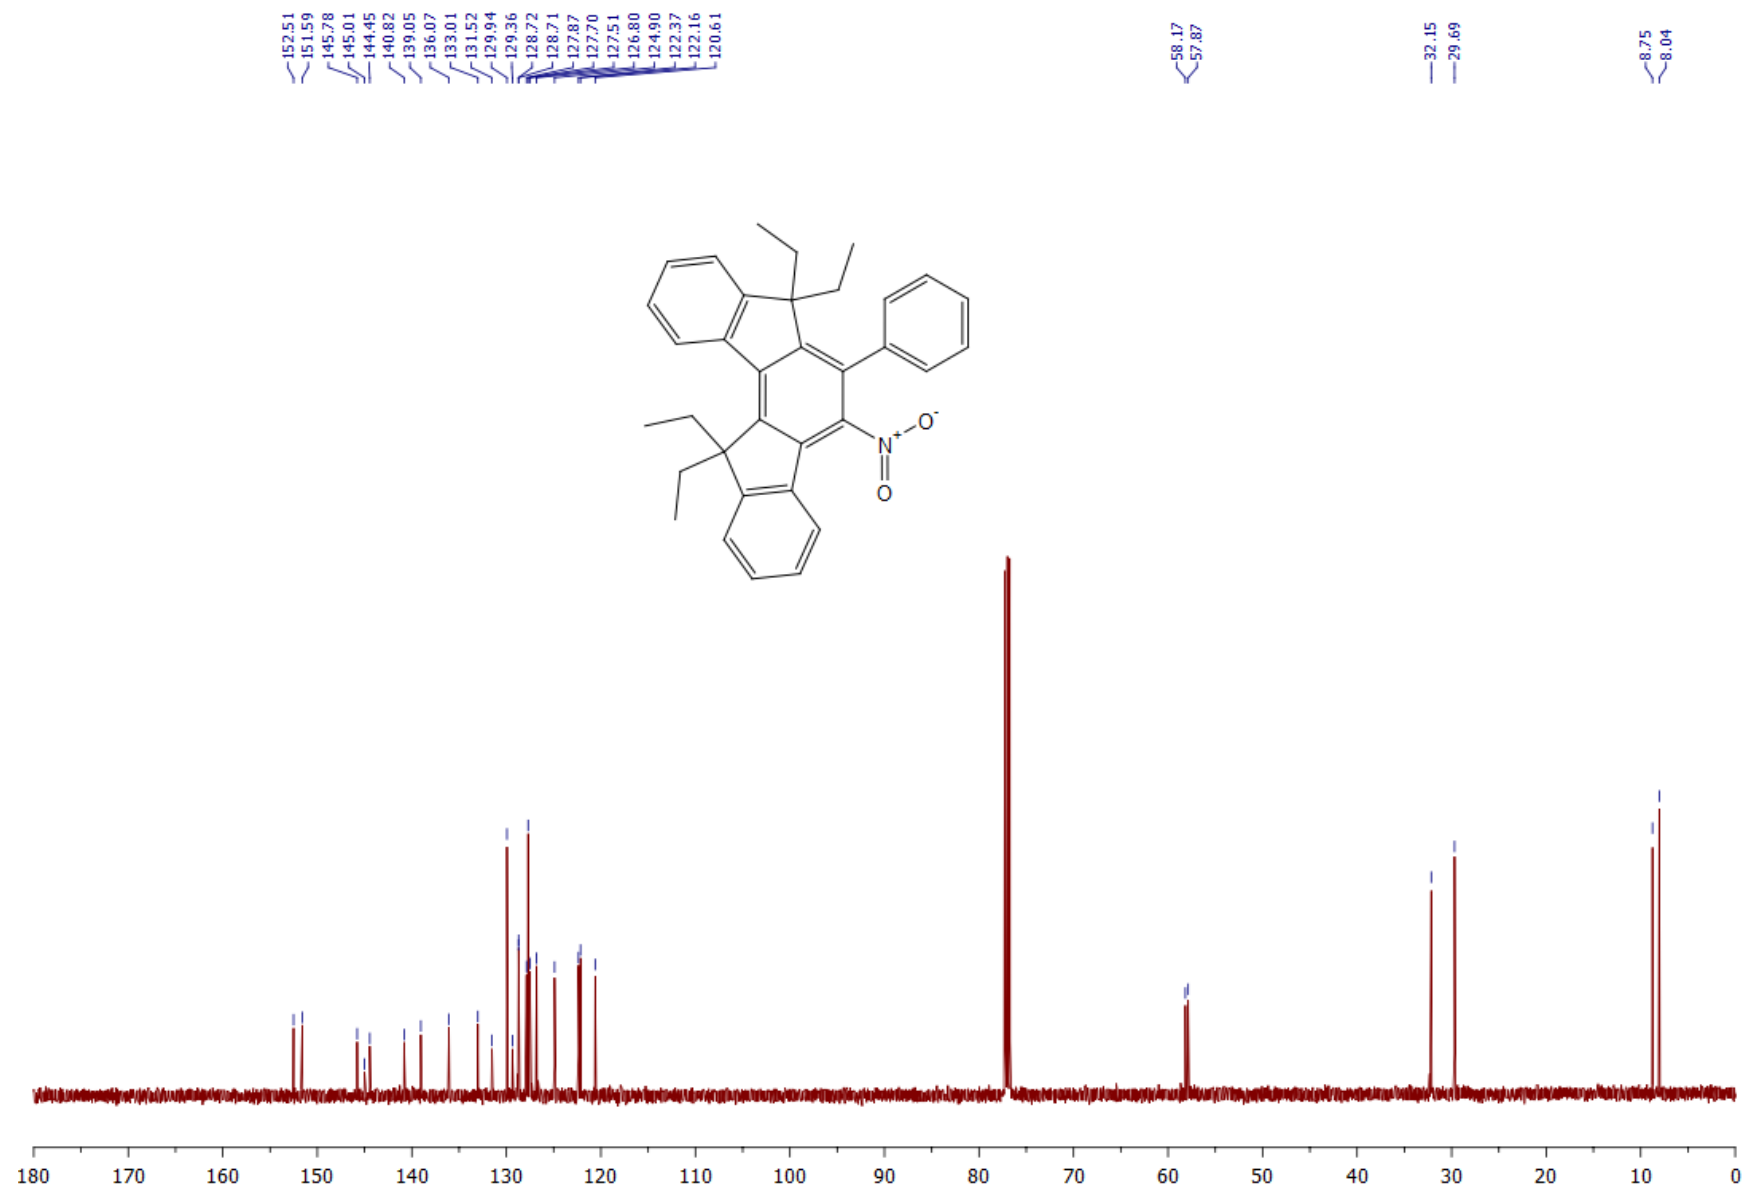

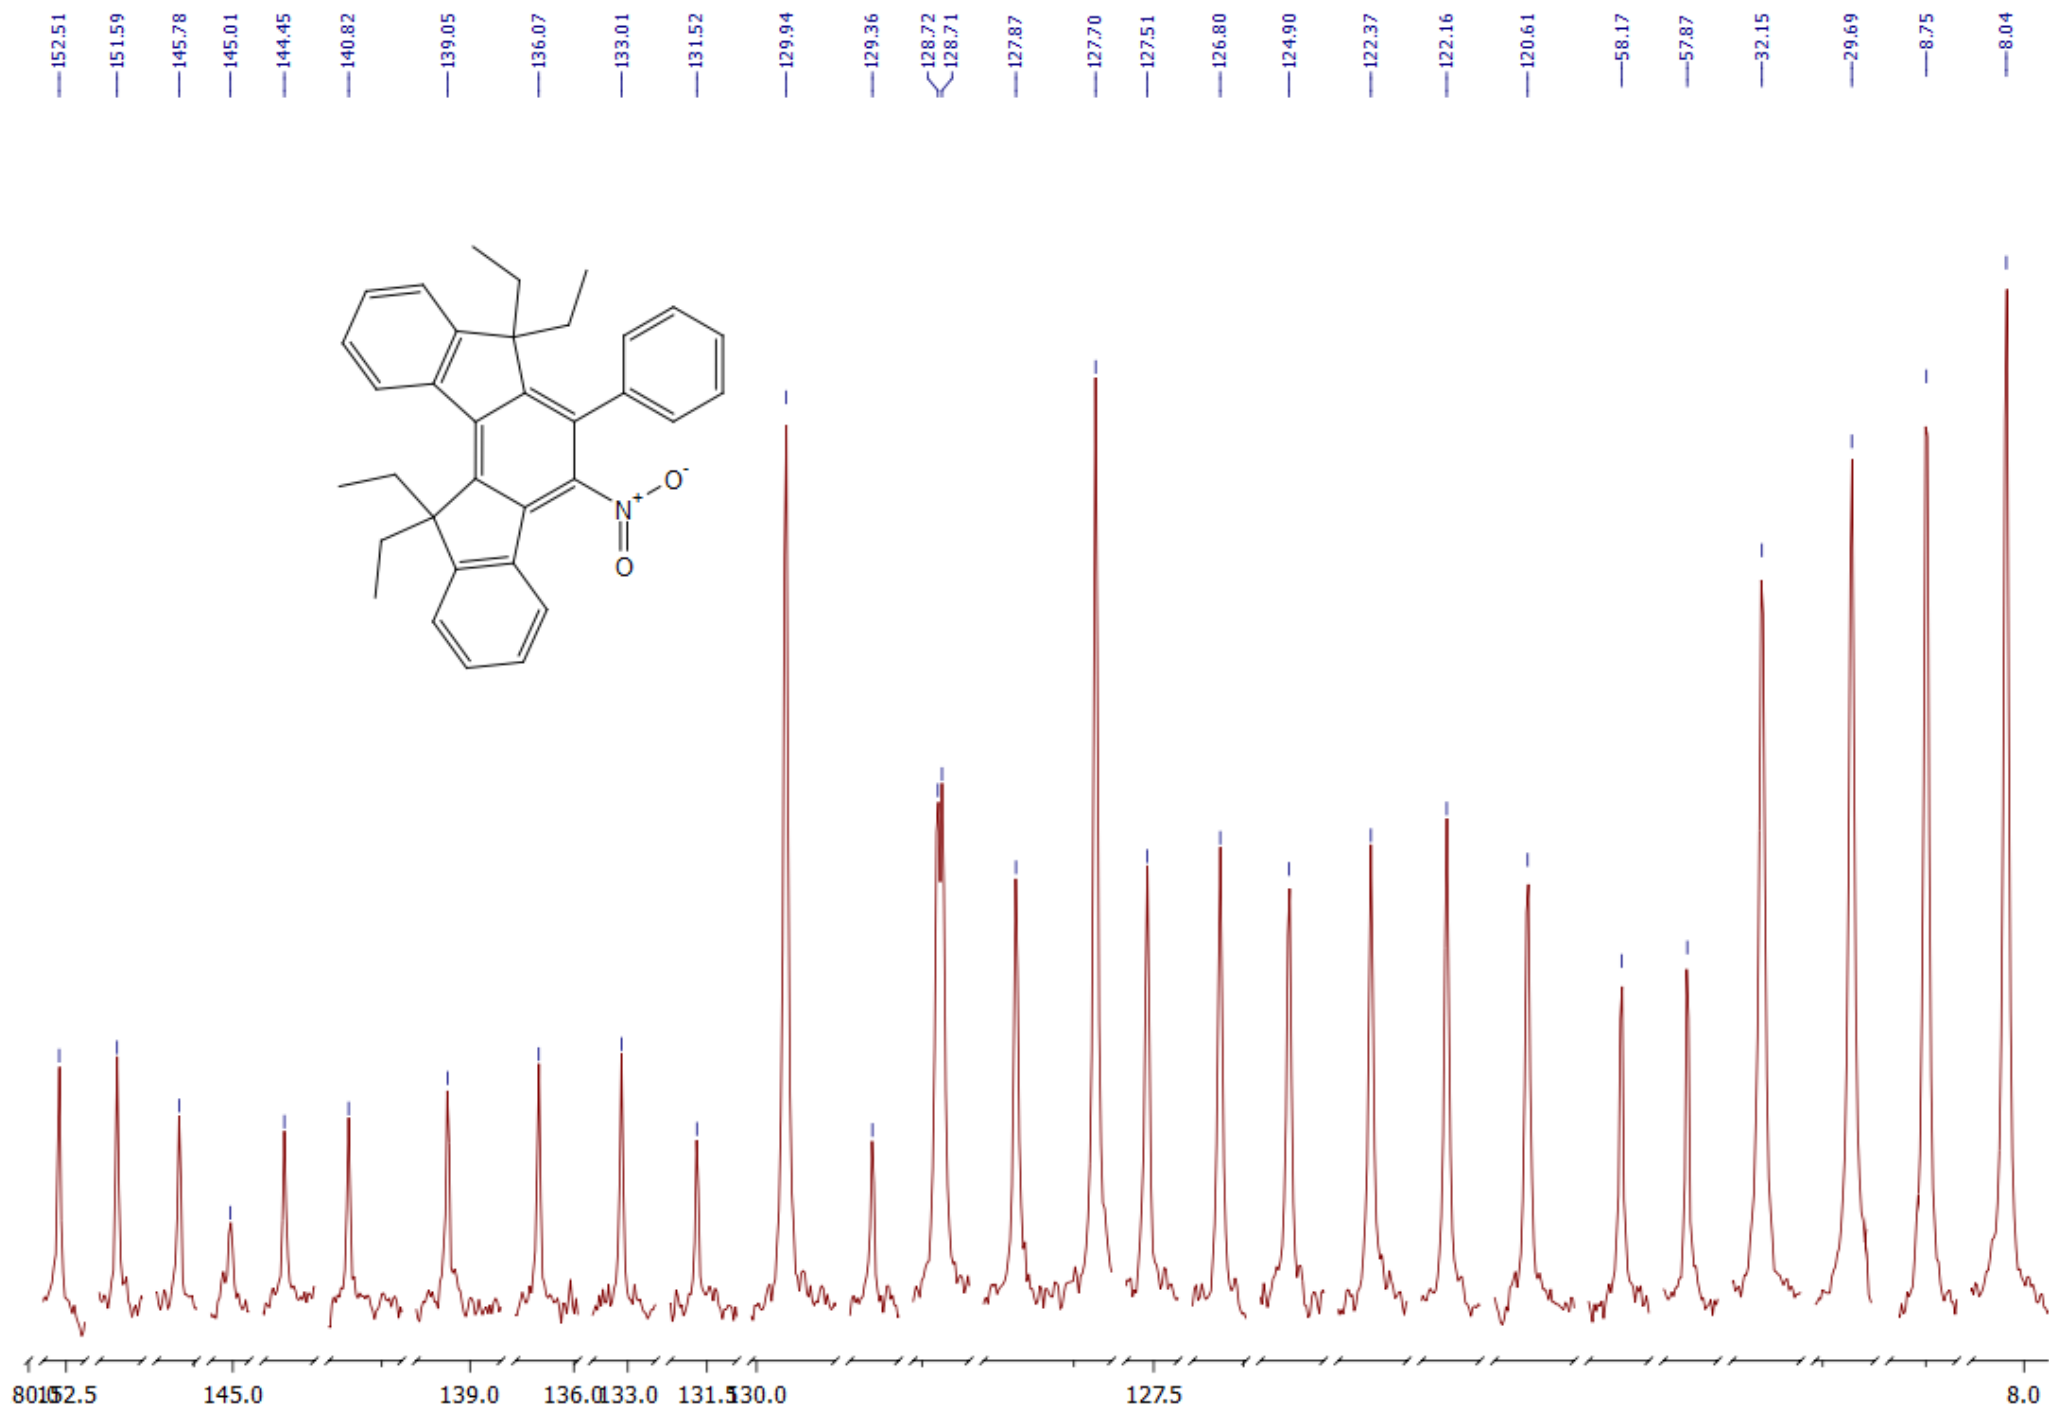

## 9. NMR spectra of **8** in CDCl<sub>3</sub>

<sup>1</sup>H NMR of **8** in CDCl<sub>3</sub> 500 MHz

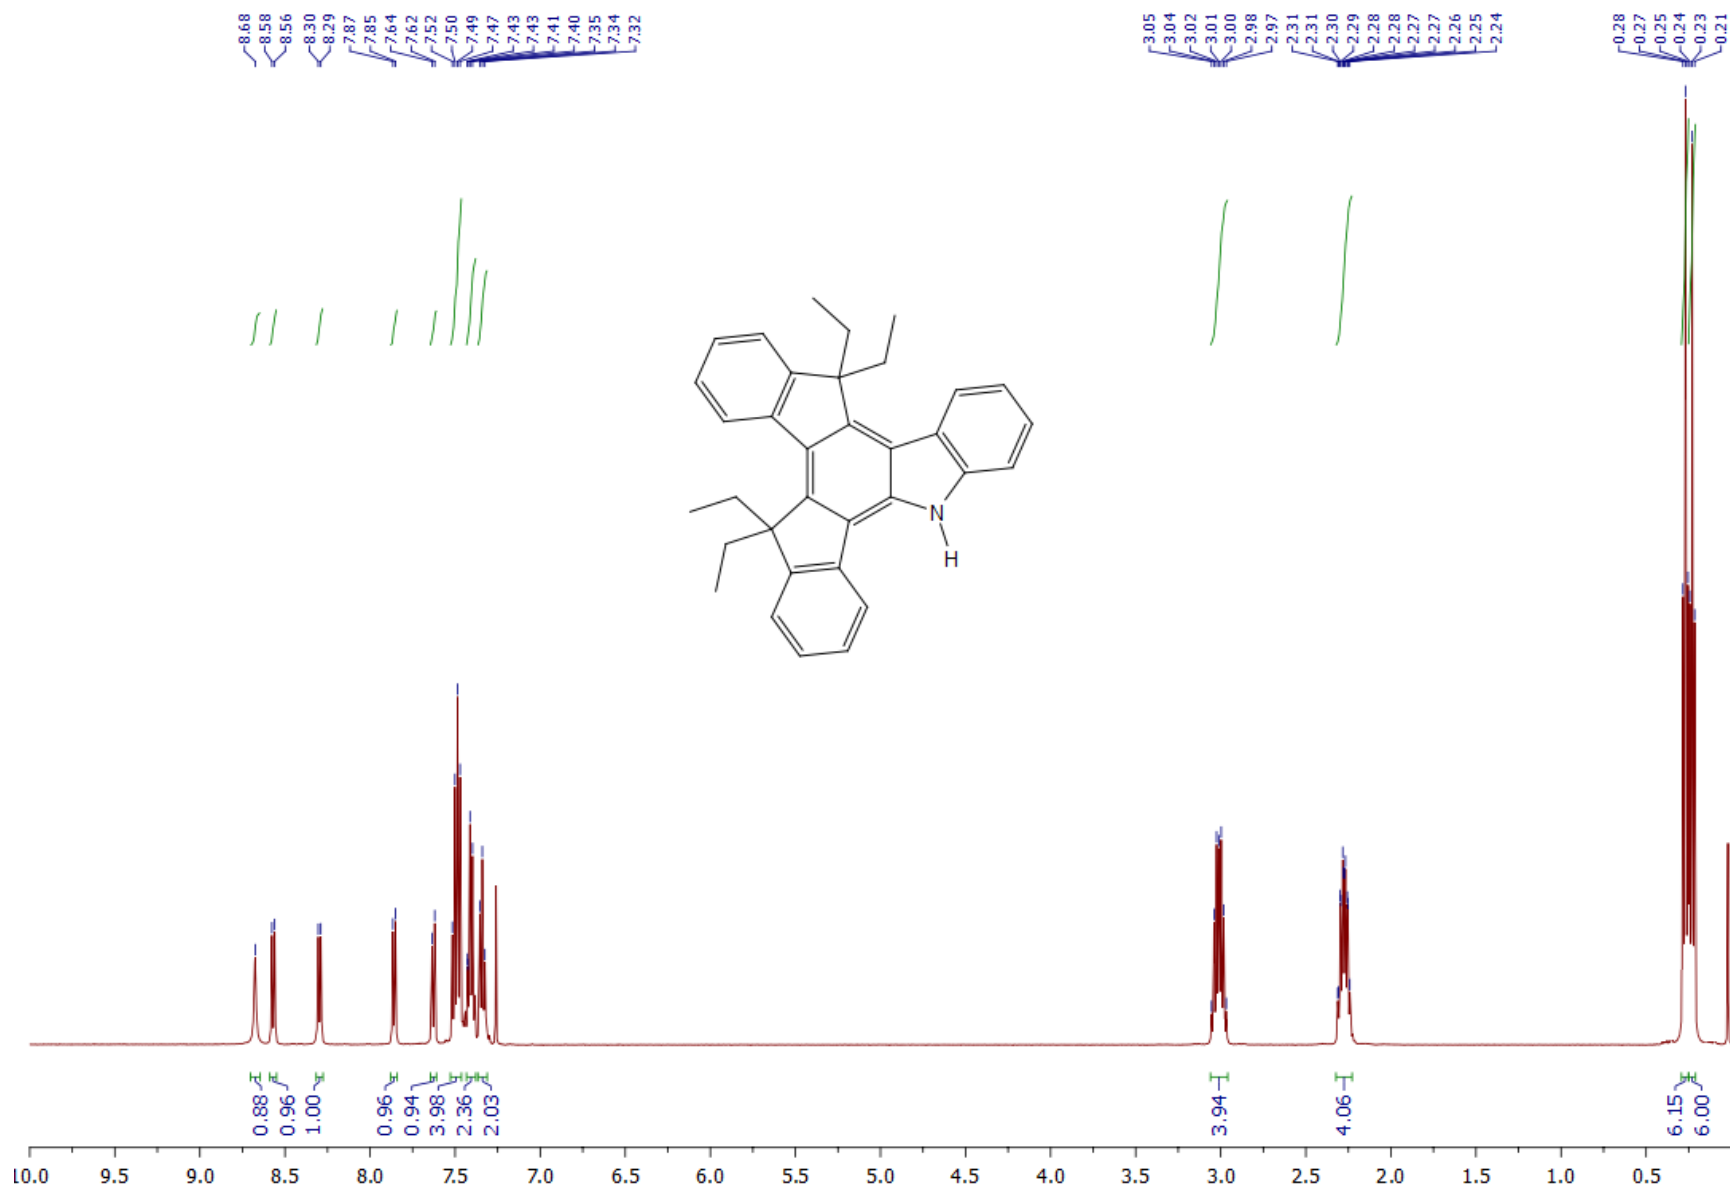

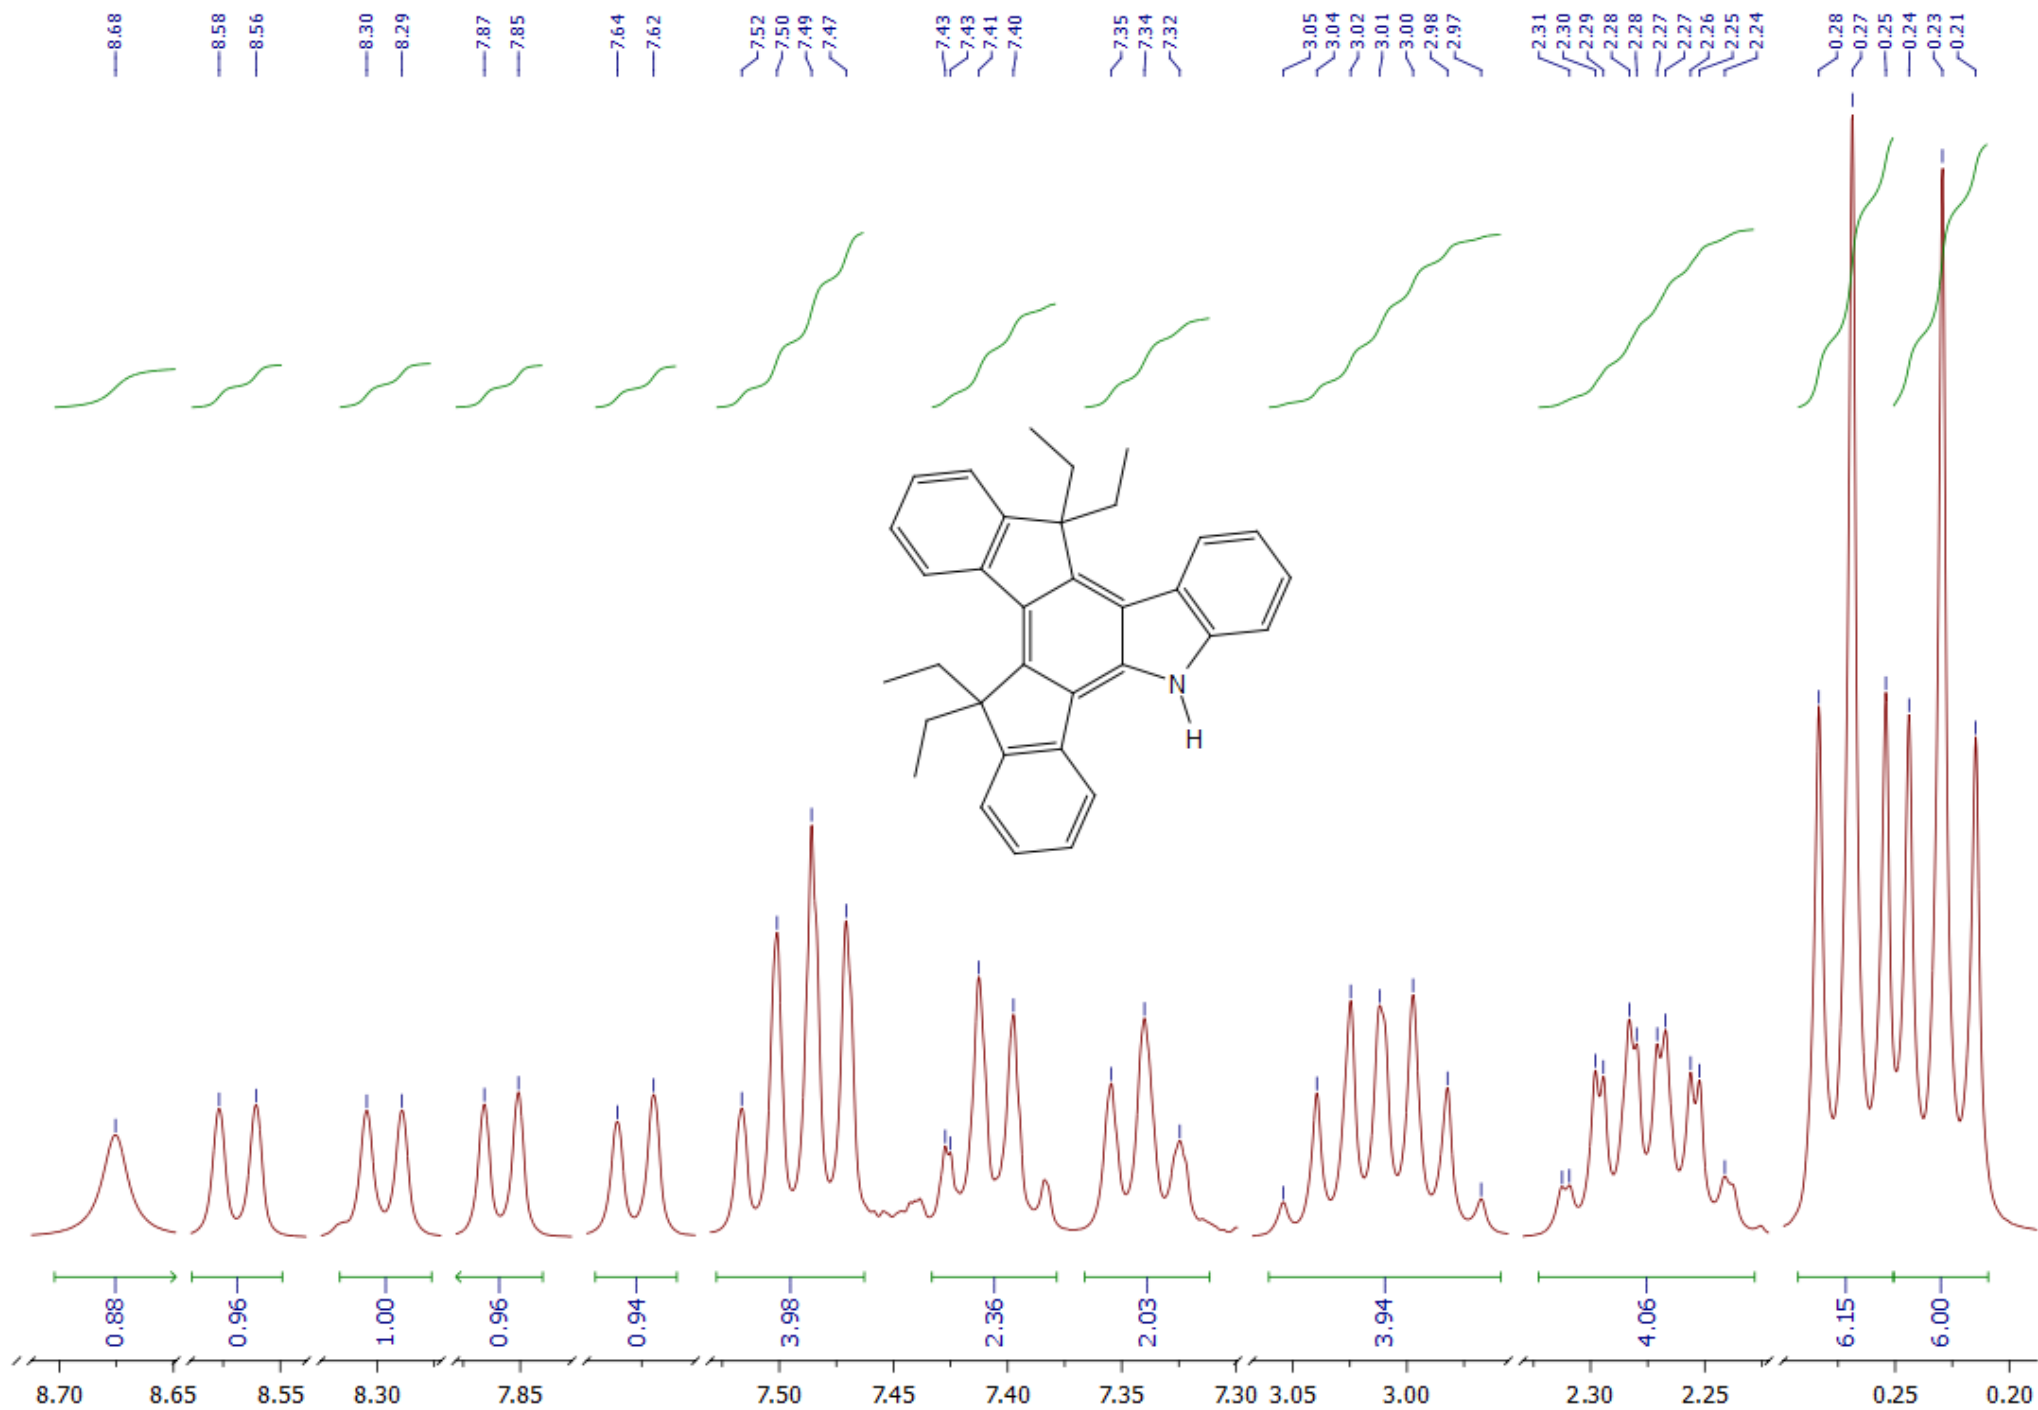

$^{13}\text{C}$   $\{^1\text{H}\}$  NMR spectra of **8** in  $\text{CDCl}_3$  126 MHz

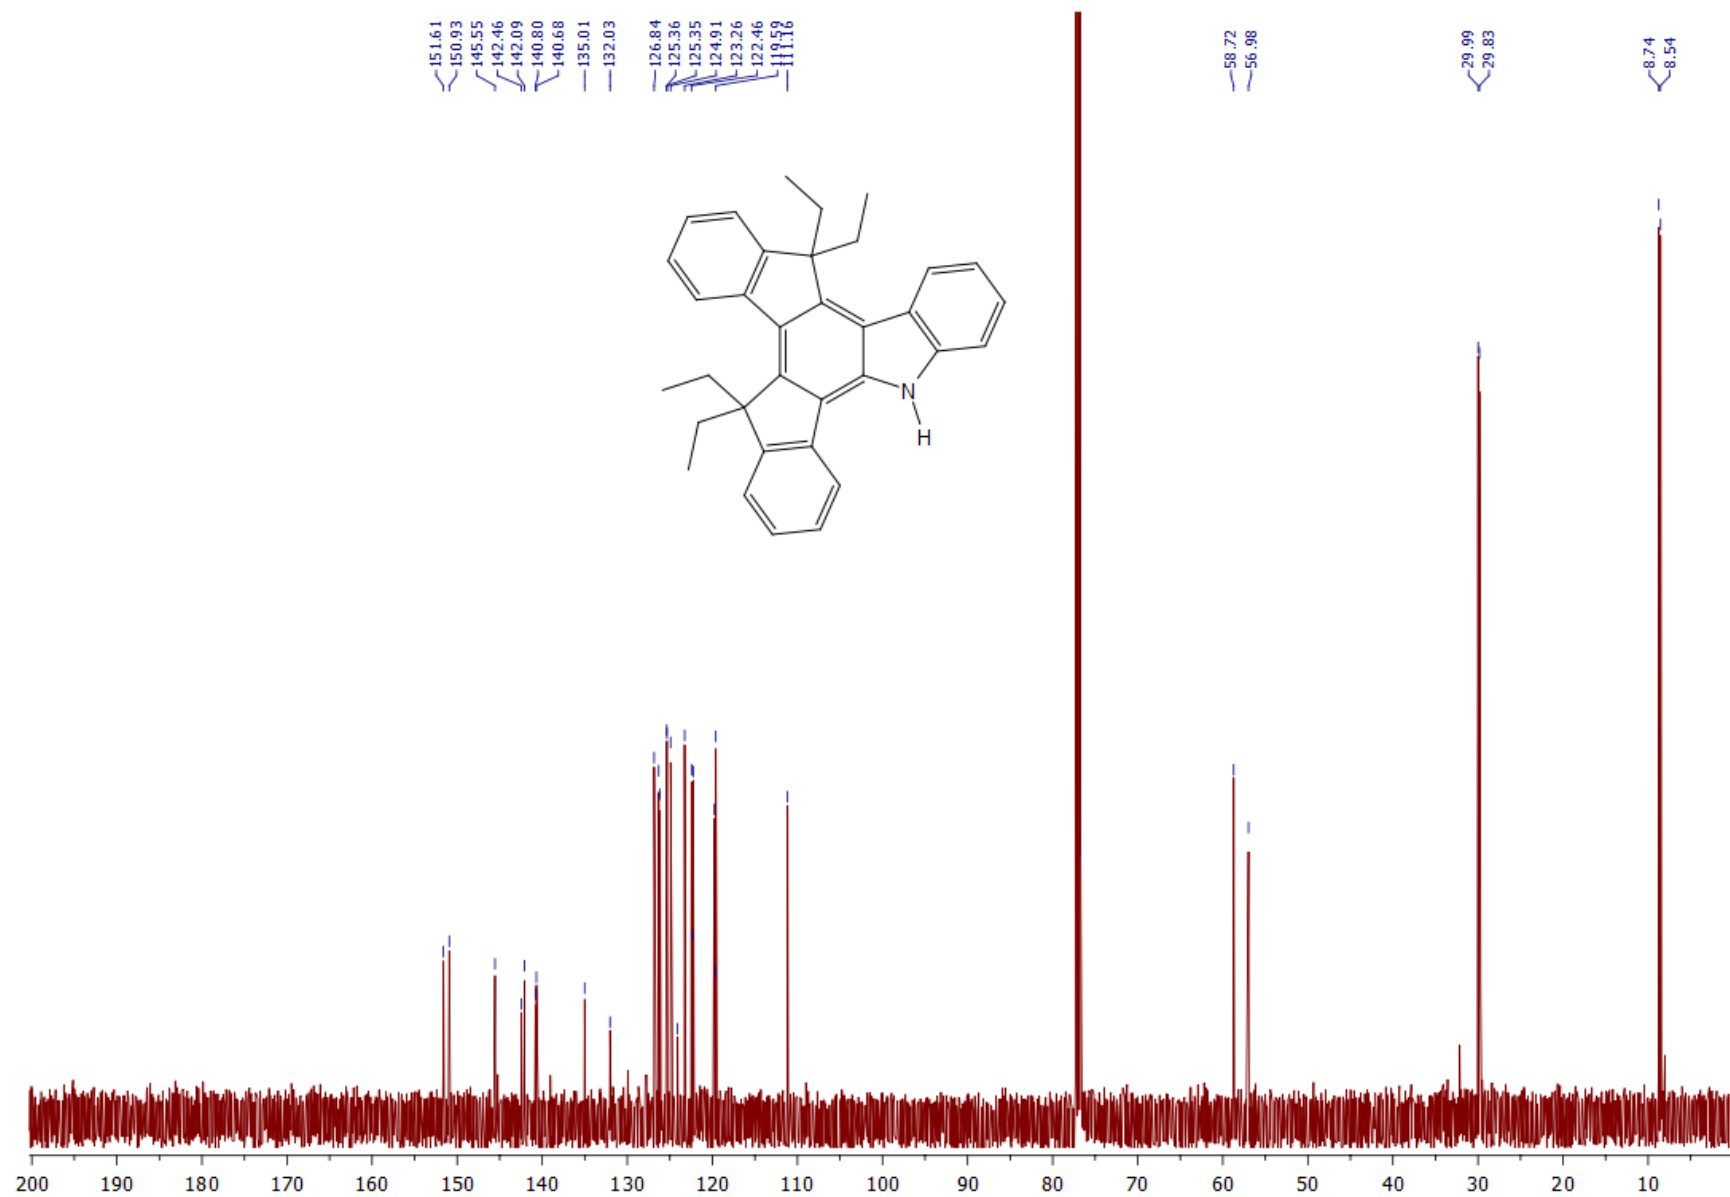

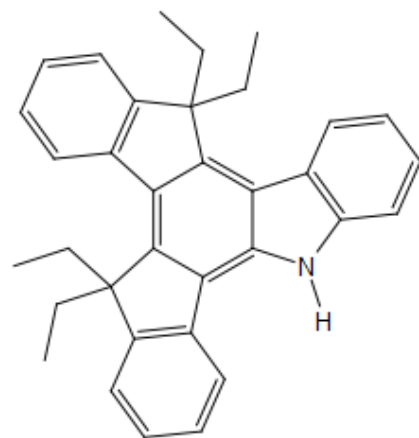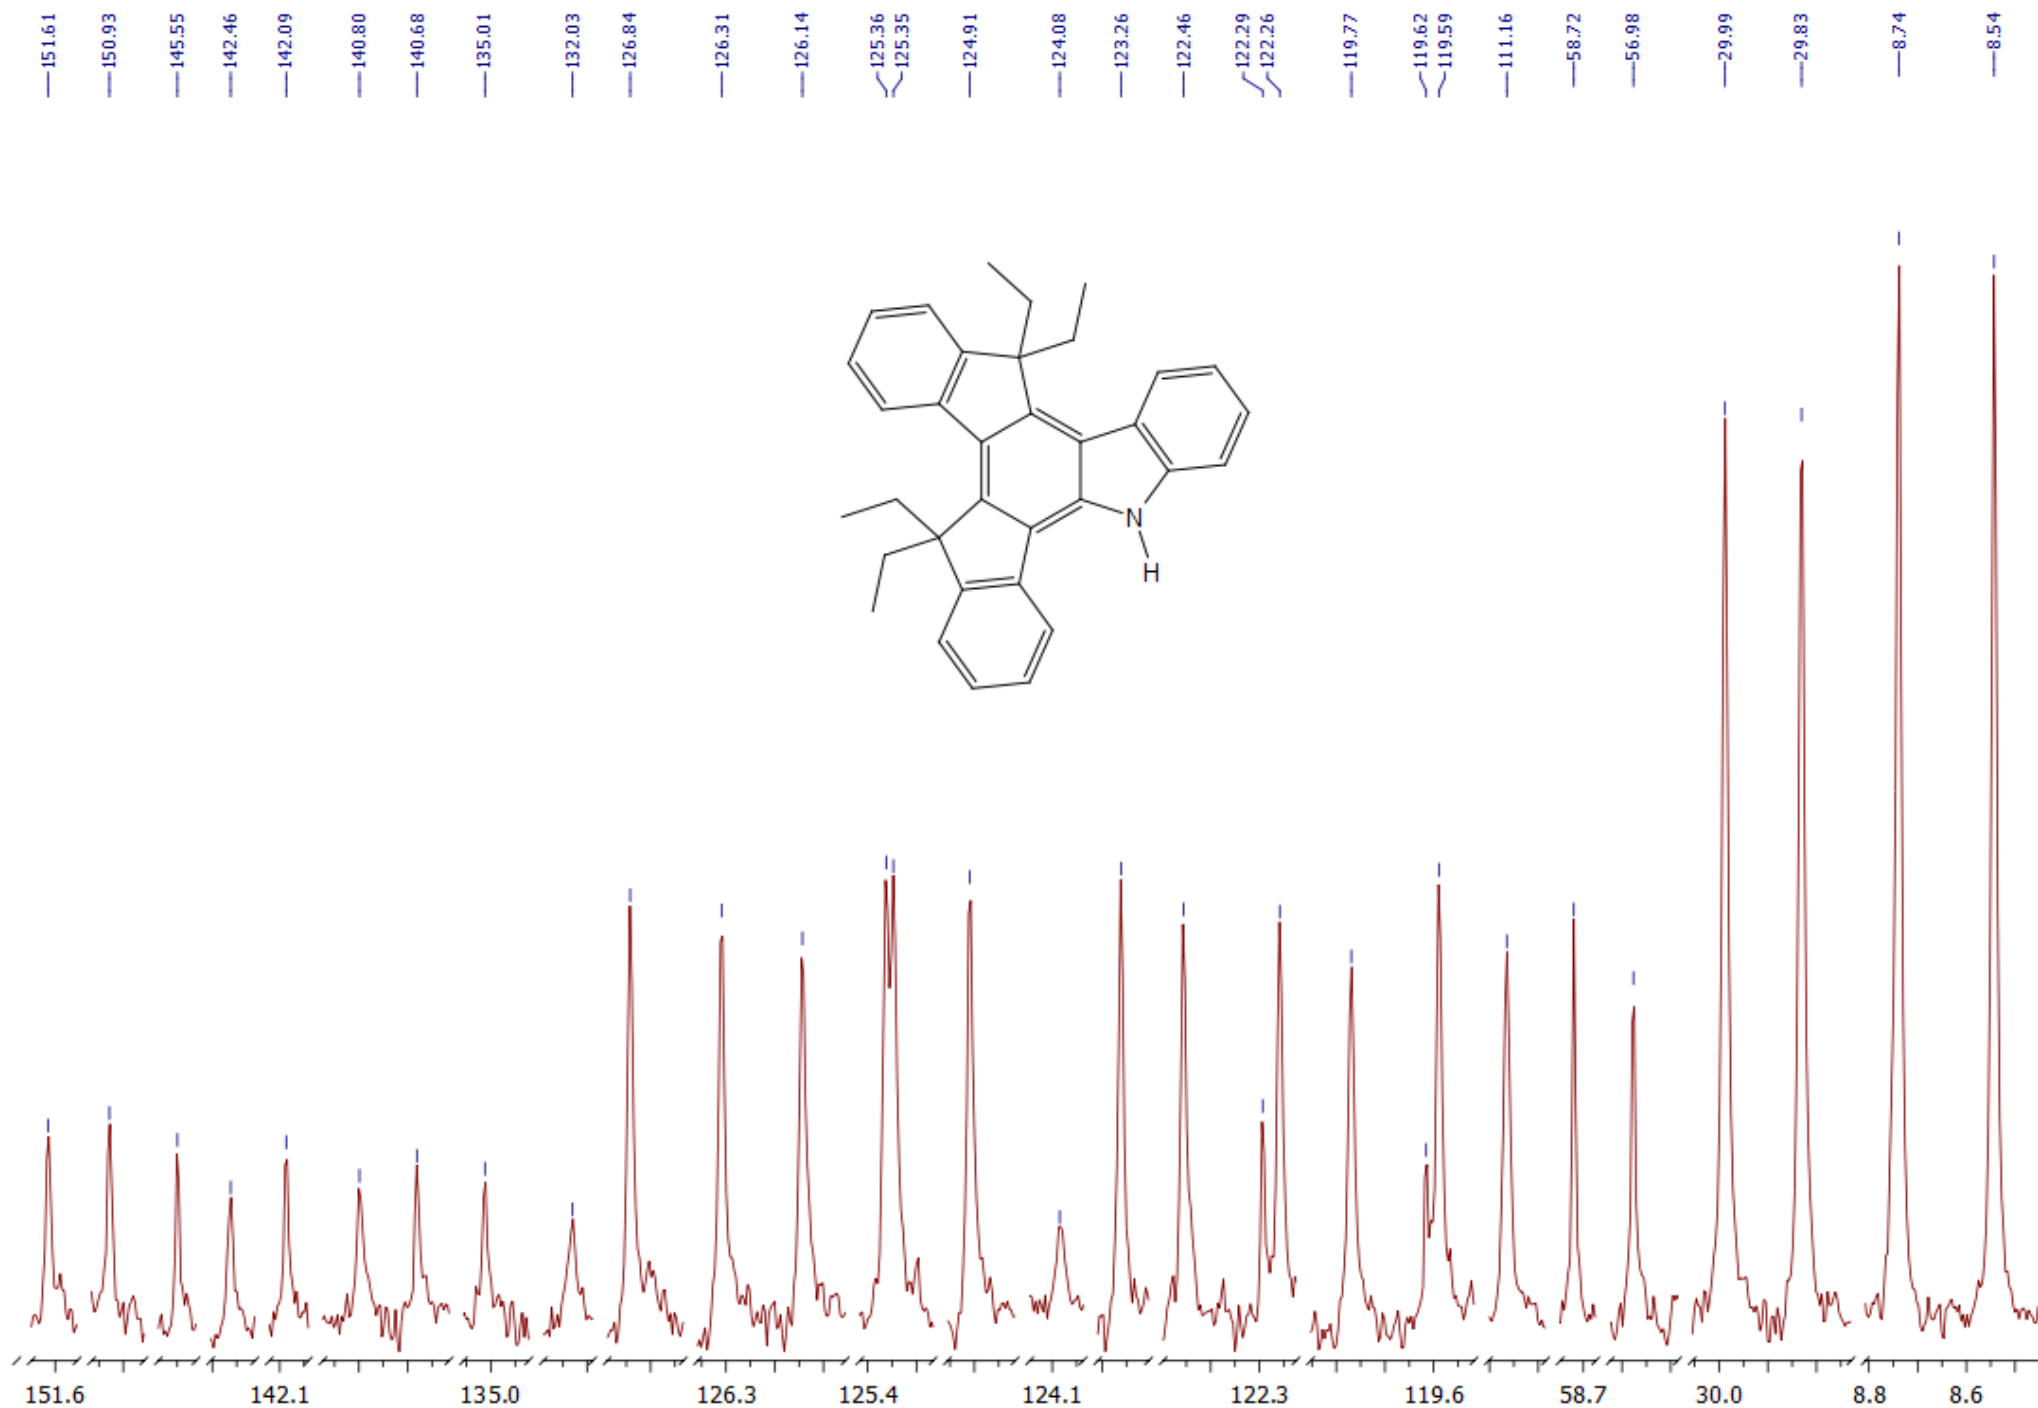

## 10. NMR spectra of NCC in C<sub>6</sub>D<sub>6</sub>

<sup>1</sup>H NMR of NCC in C<sub>6</sub>D<sub>6</sub>, 500 MHz

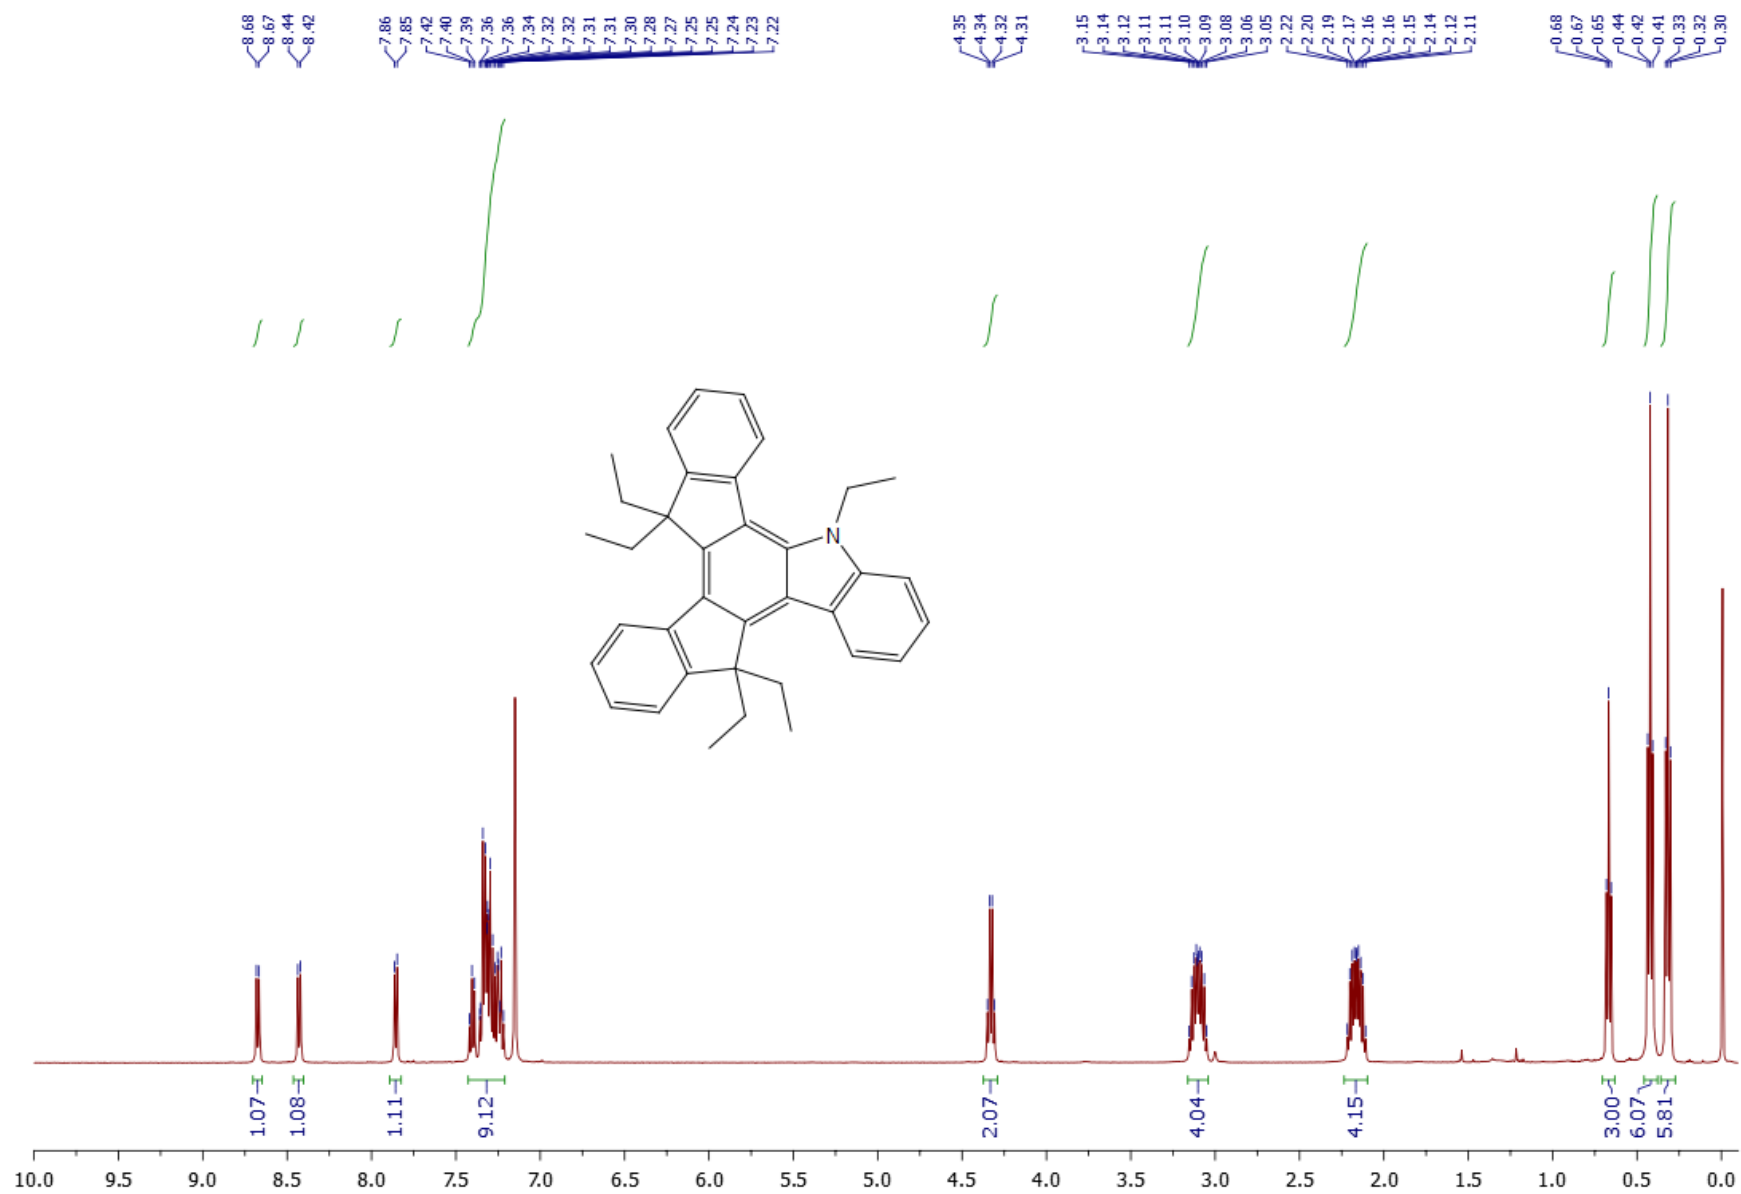

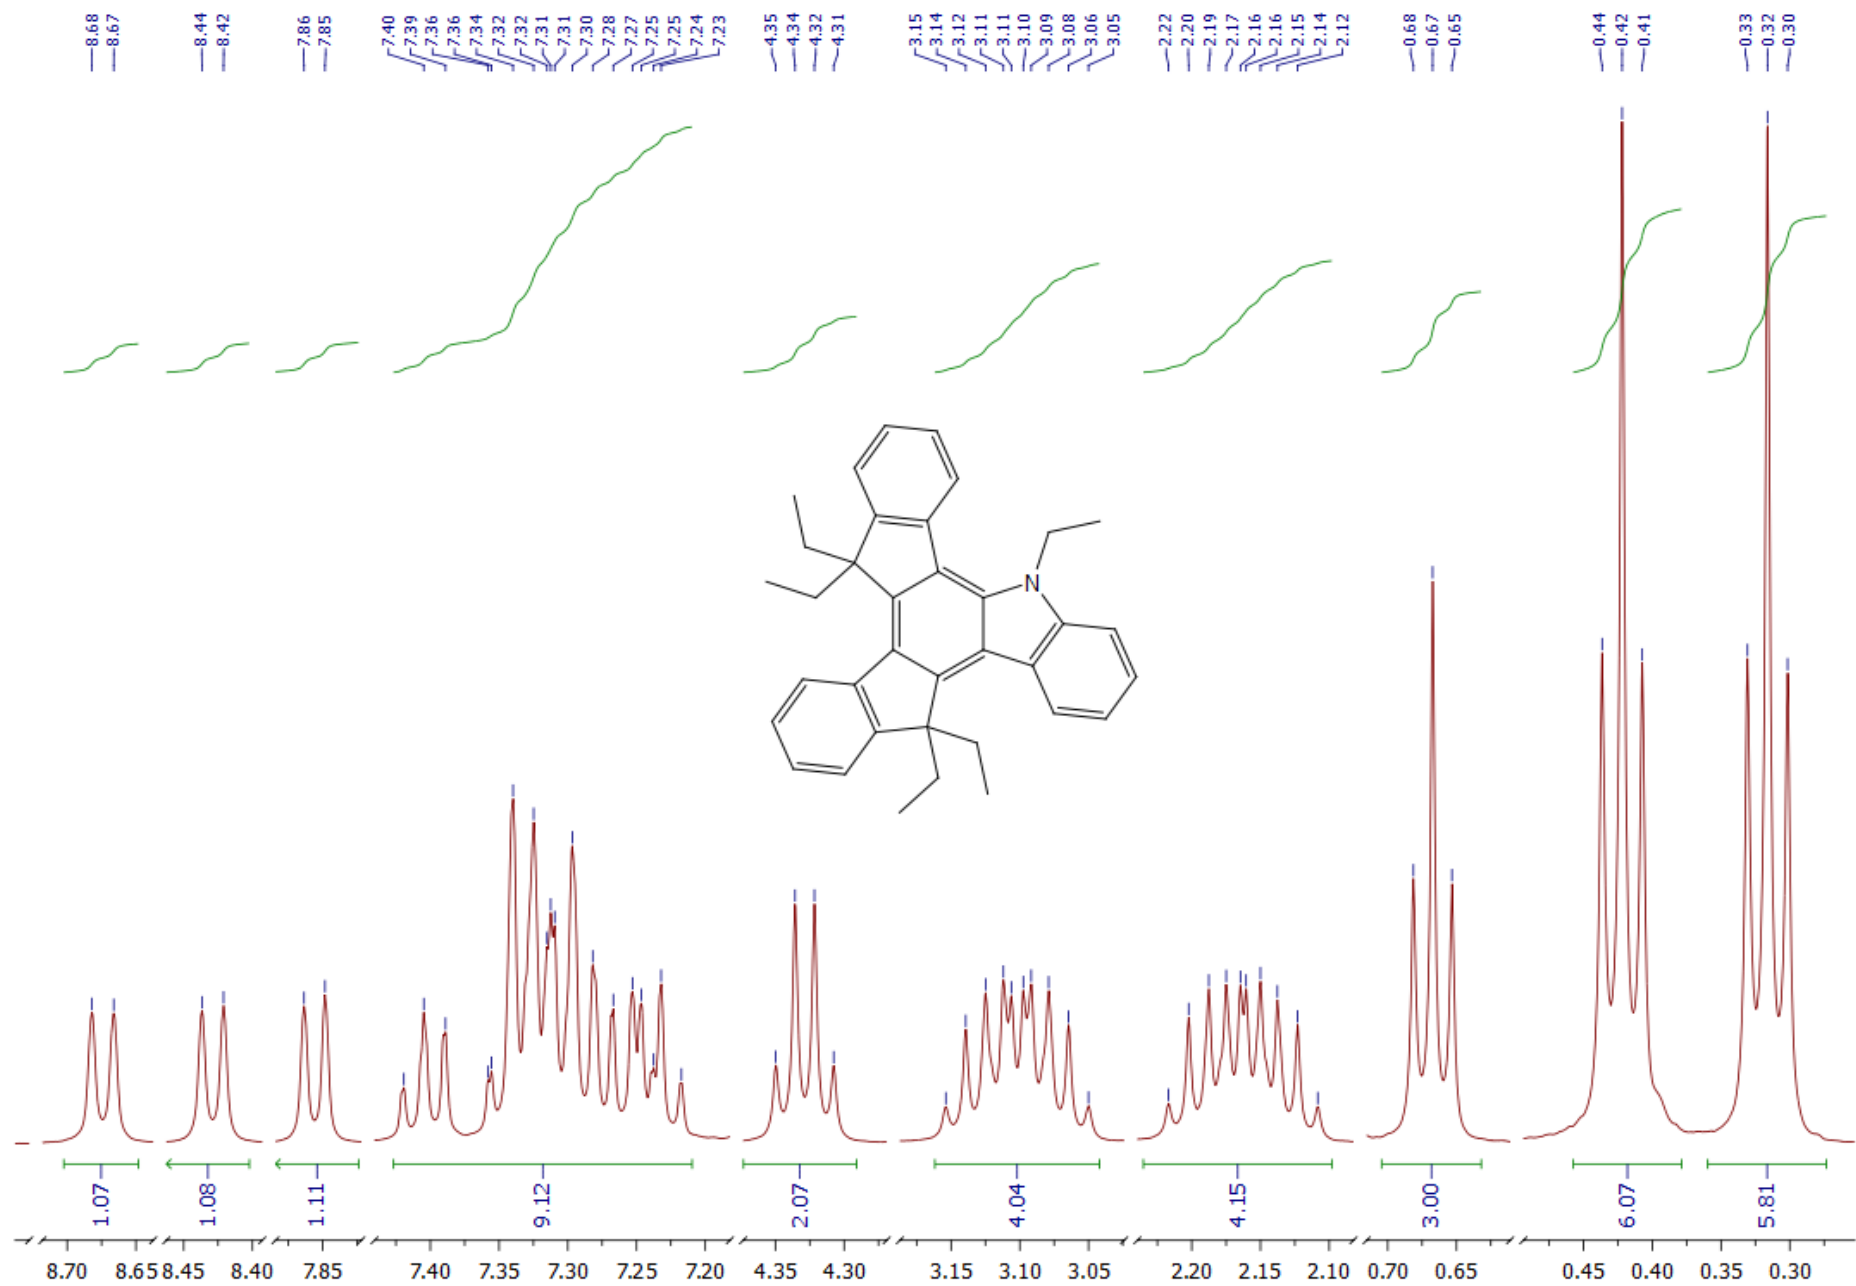



$^{13}\text{C}\{^1\text{H}\}$  NMR of NCC in  $\text{C}_6\text{D}_6$ , 126 MHz

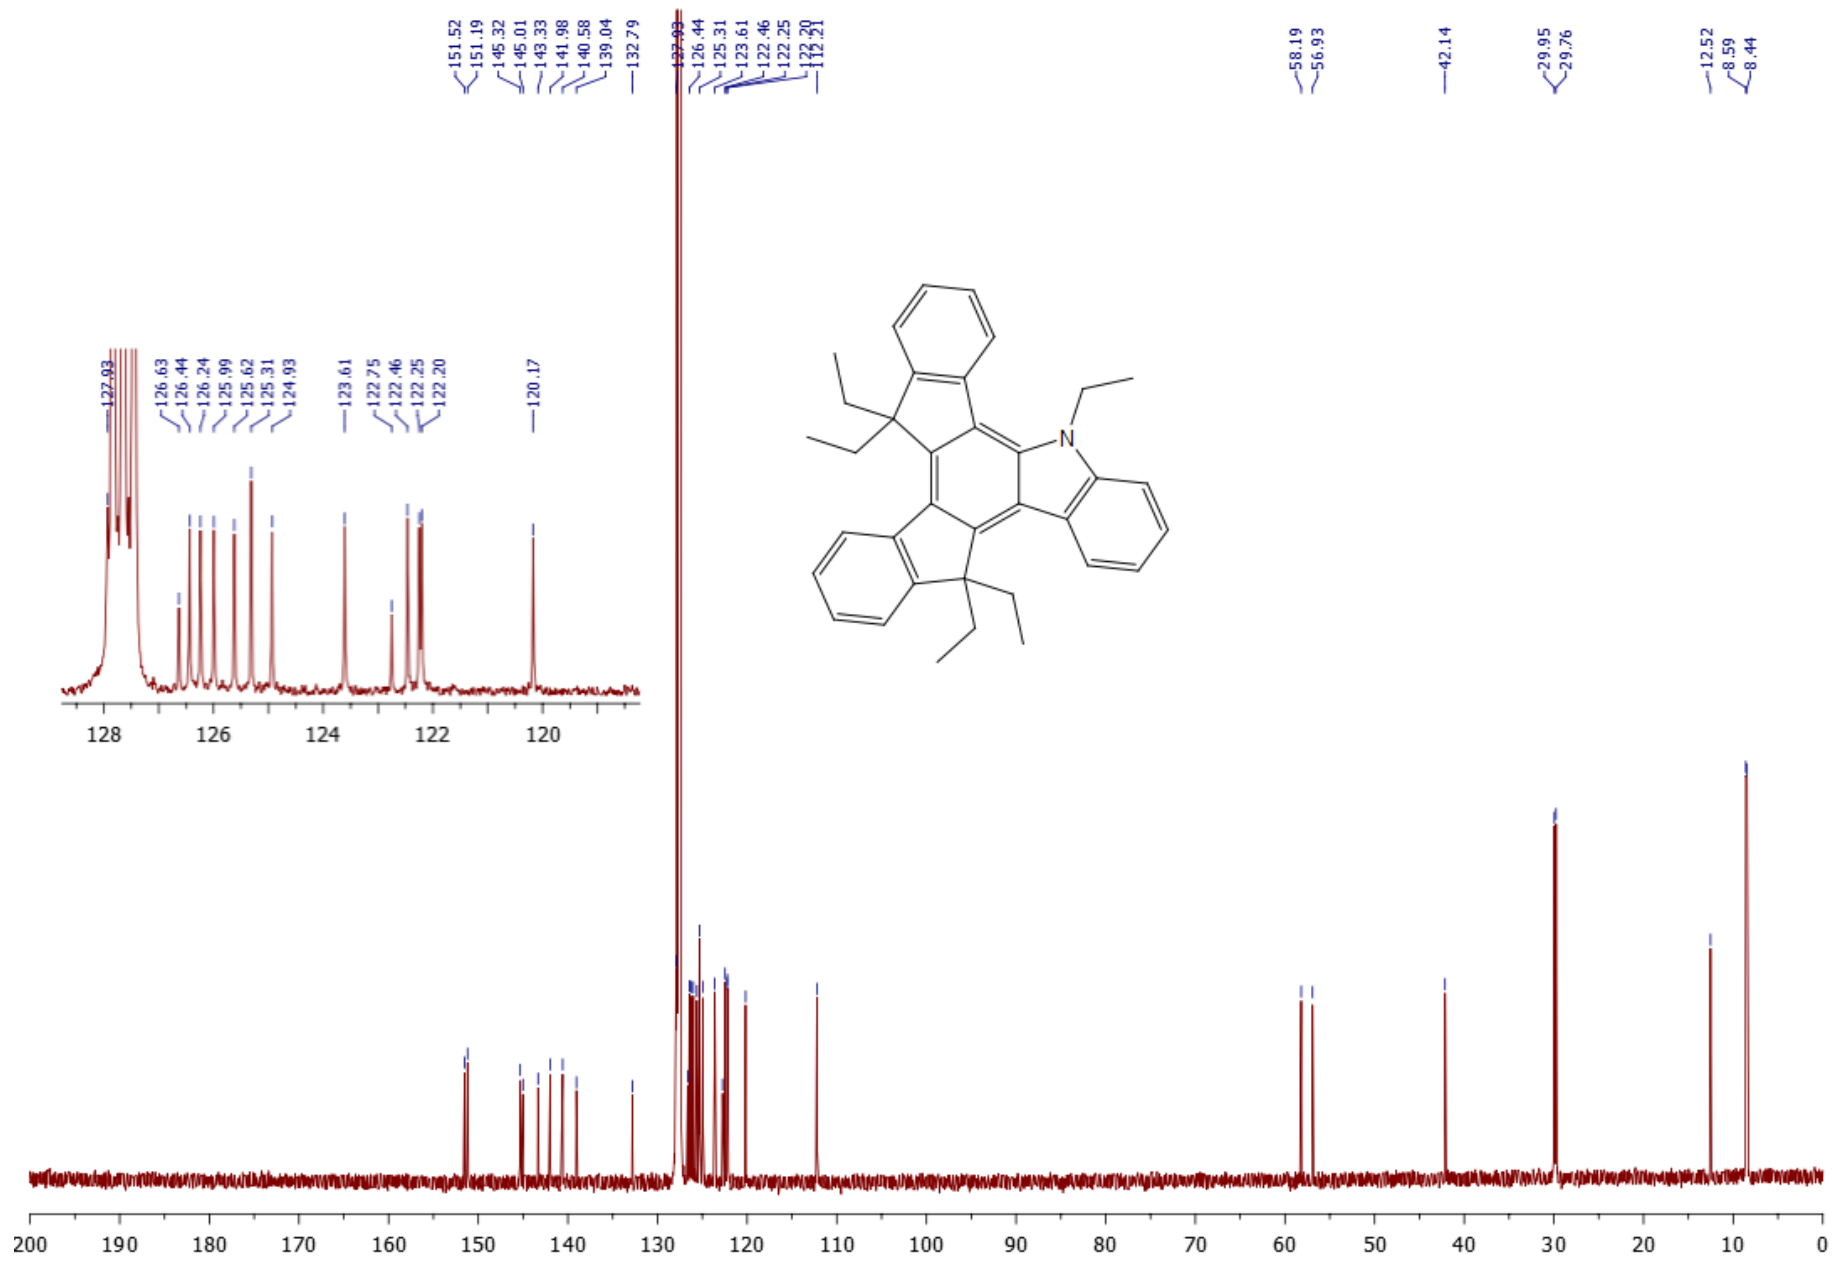

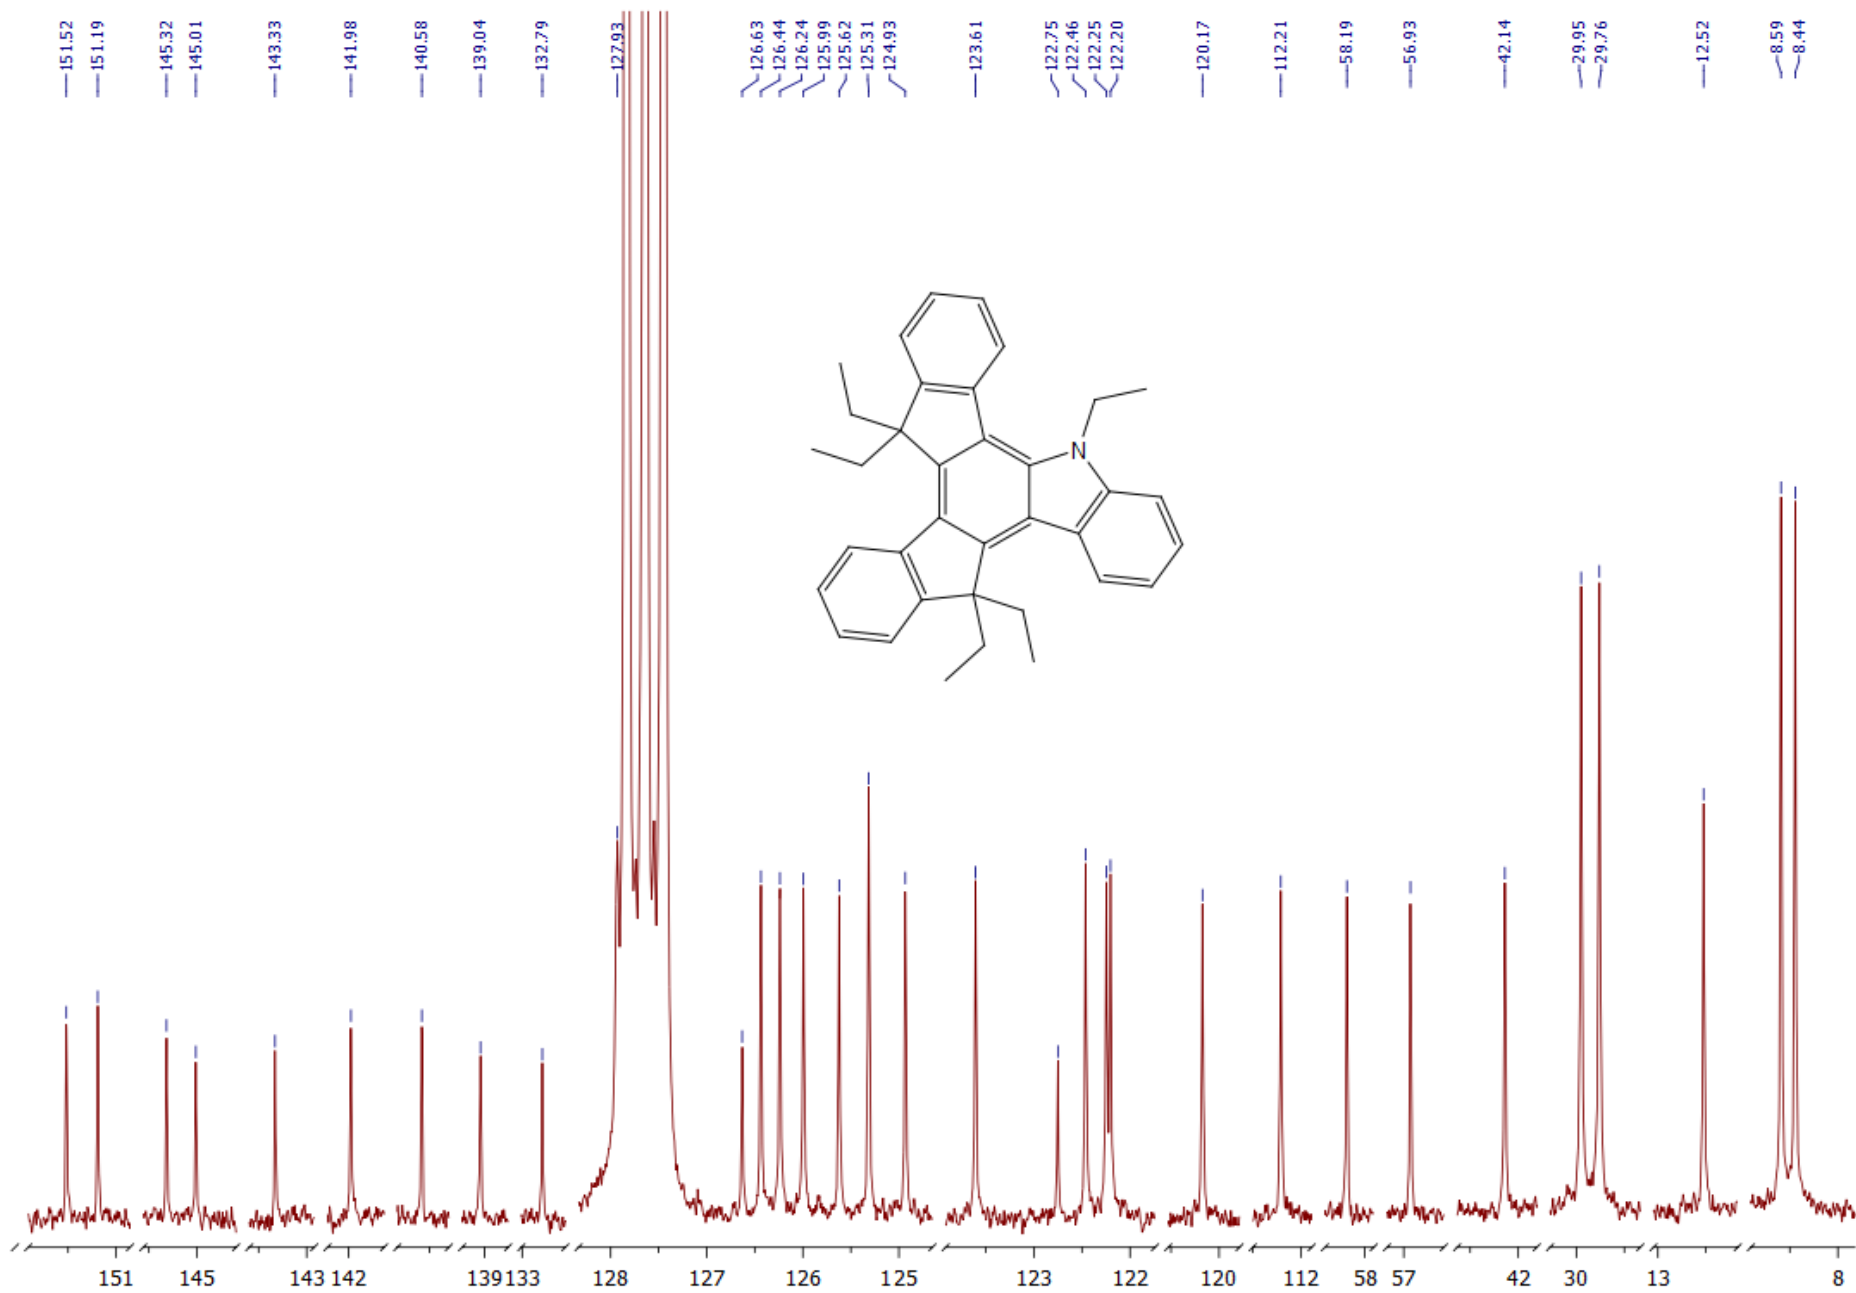

# 11. NMR spectra of 9a in CDCl<sub>3</sub>

<sup>1</sup>H NMR of 9a in CDCl<sub>3</sub> 500 MHz

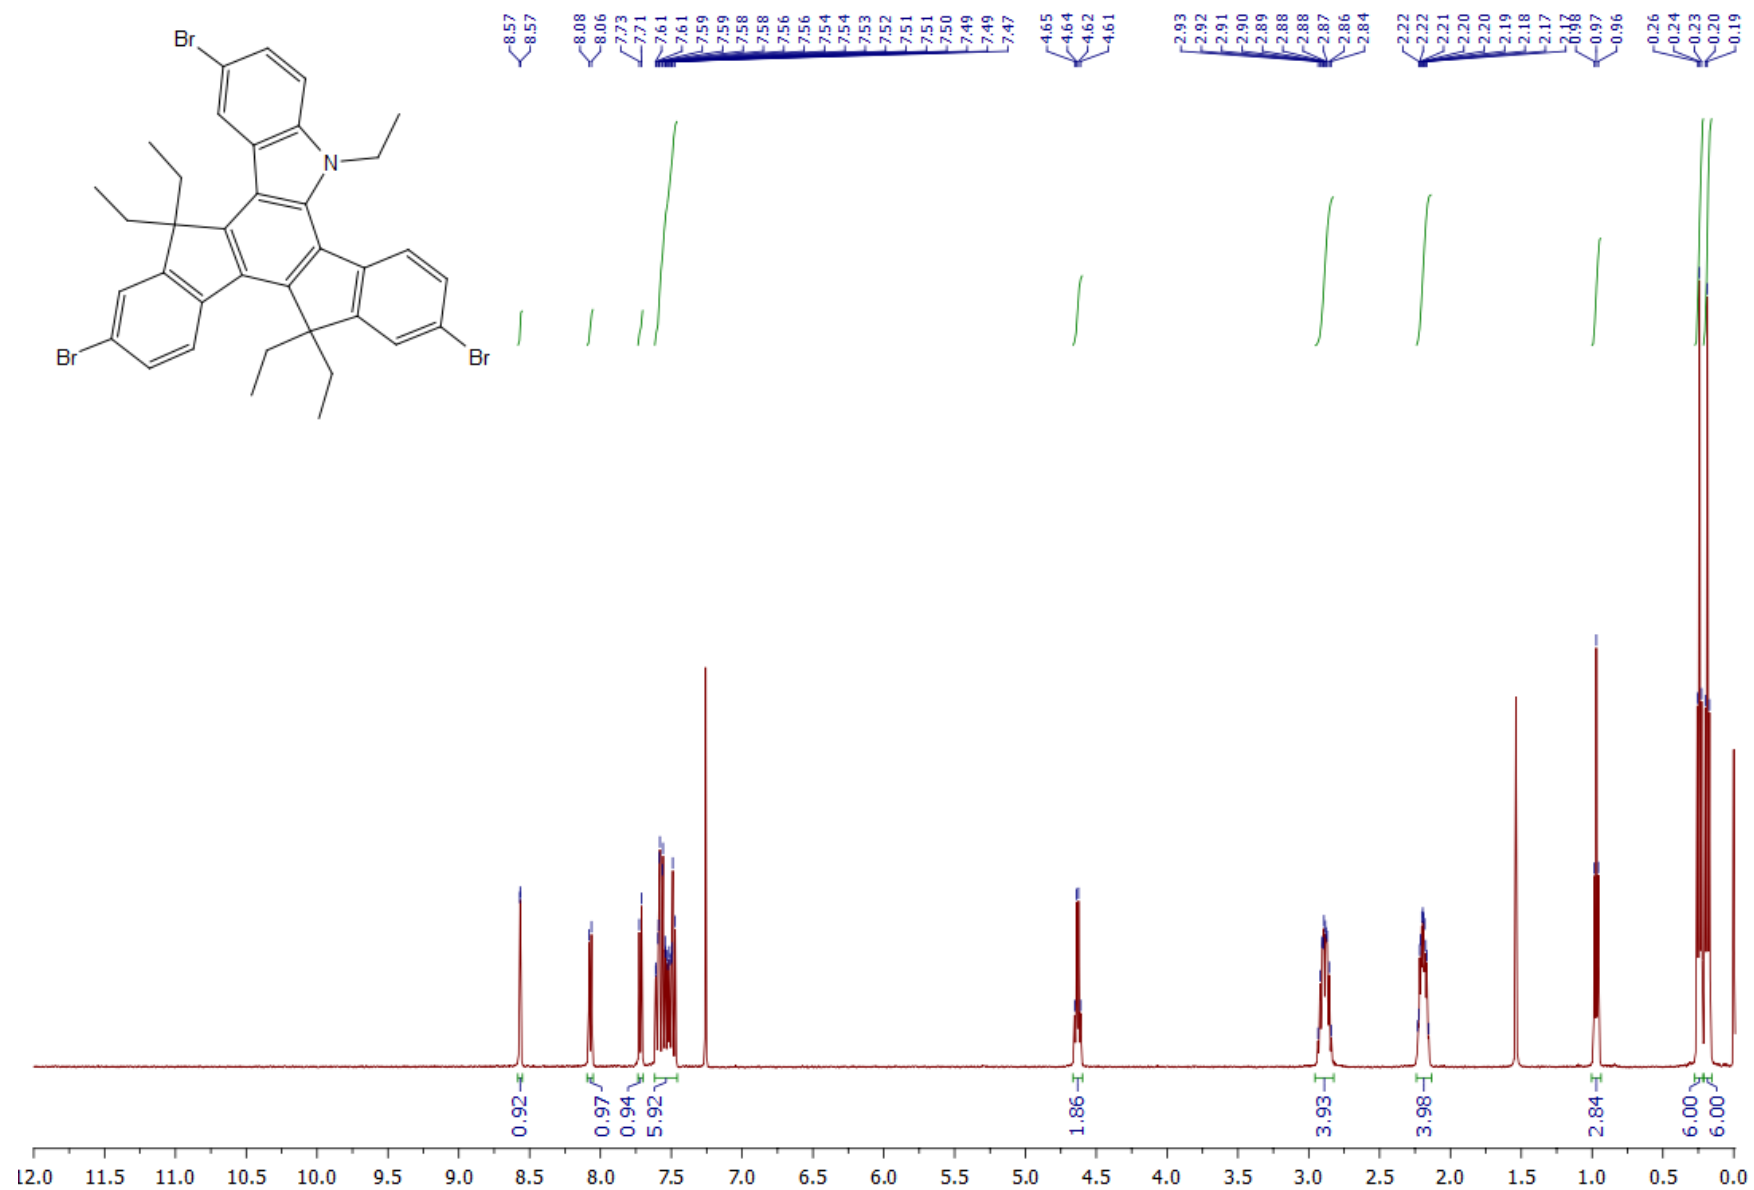

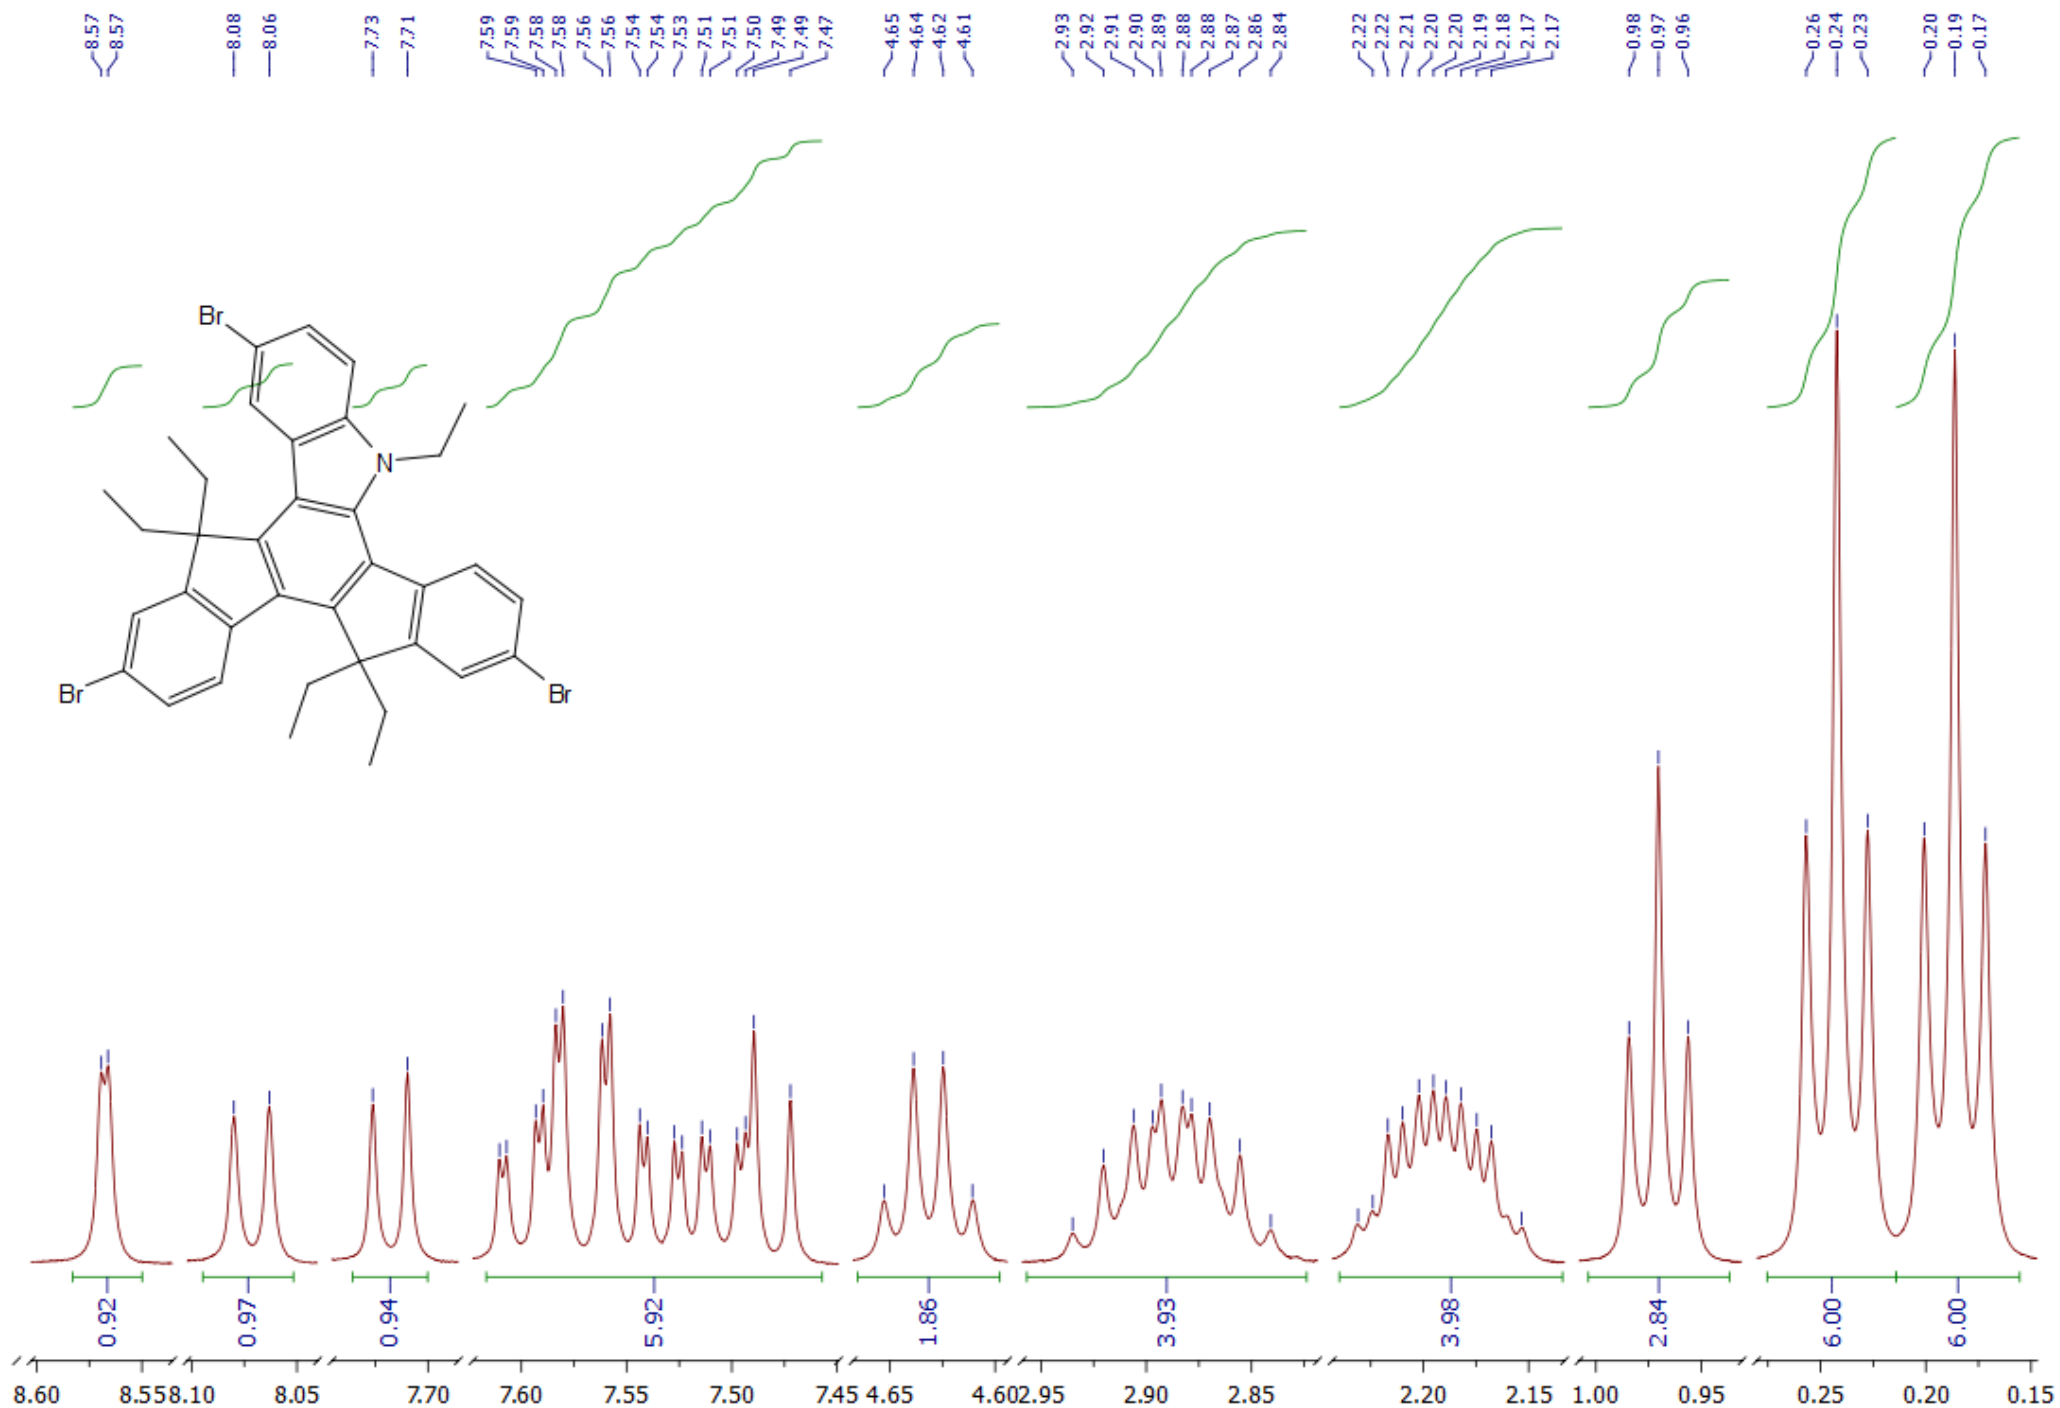

$^{13}\text{C}$   $\{^1\text{H}\}$  NMR spectra of 9a in  $\text{CDCl}_3$  126 MHz

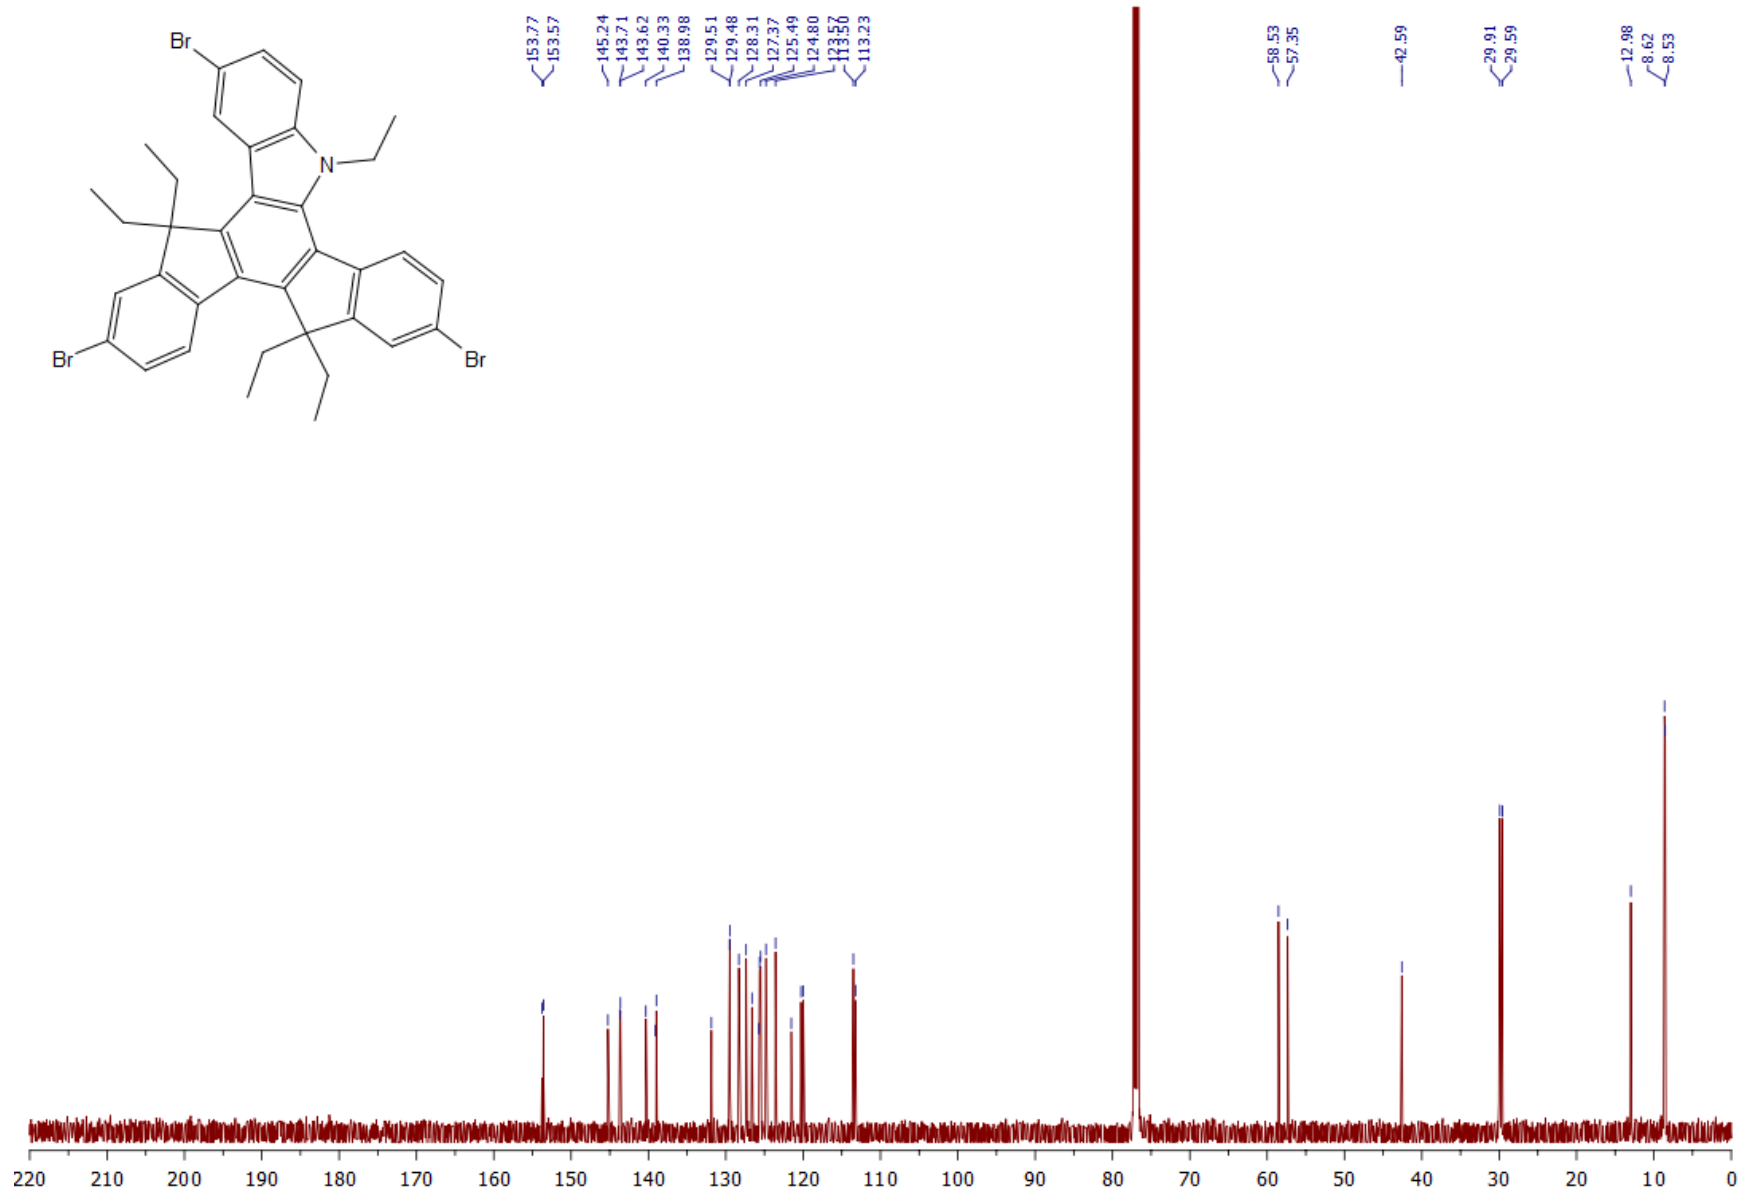

—153.77  
—153.57  
—145.24  
—143.71  
—143.62  
—140.33  
—139.10  
—138.98  
—131.86  
—129.48  
—128.31  
—127.37  
—126.62  
—125.63  
—125.49  
—124.80  
—123.57  
—121.53  
—120.28  
—119.98  
—113.50  
—113.23  
—58.53  
—57.35  
—42.59  
—29.91  
—29.59  
—12.98  
—8.62  
—8.53

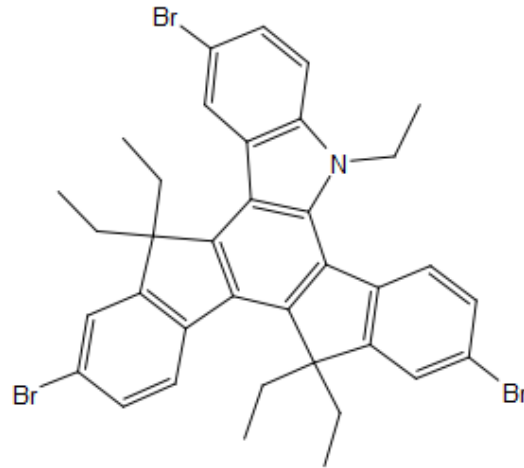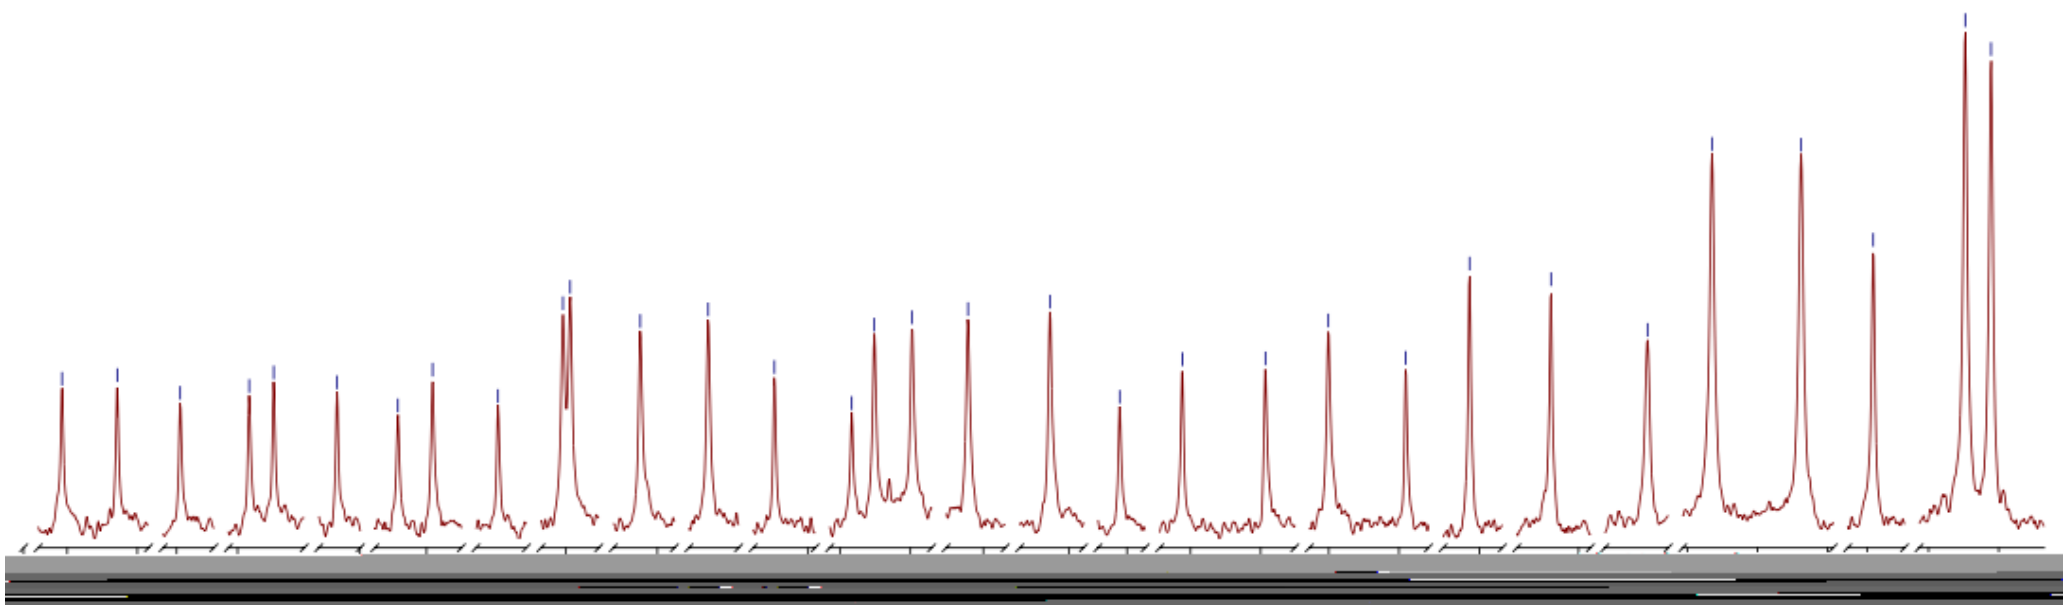

12. NMR spectra of 10 in CDCl<sub>3</sub>

<sup>1</sup>H NMR of 10 in CDCl<sub>3</sub> 500 MHz

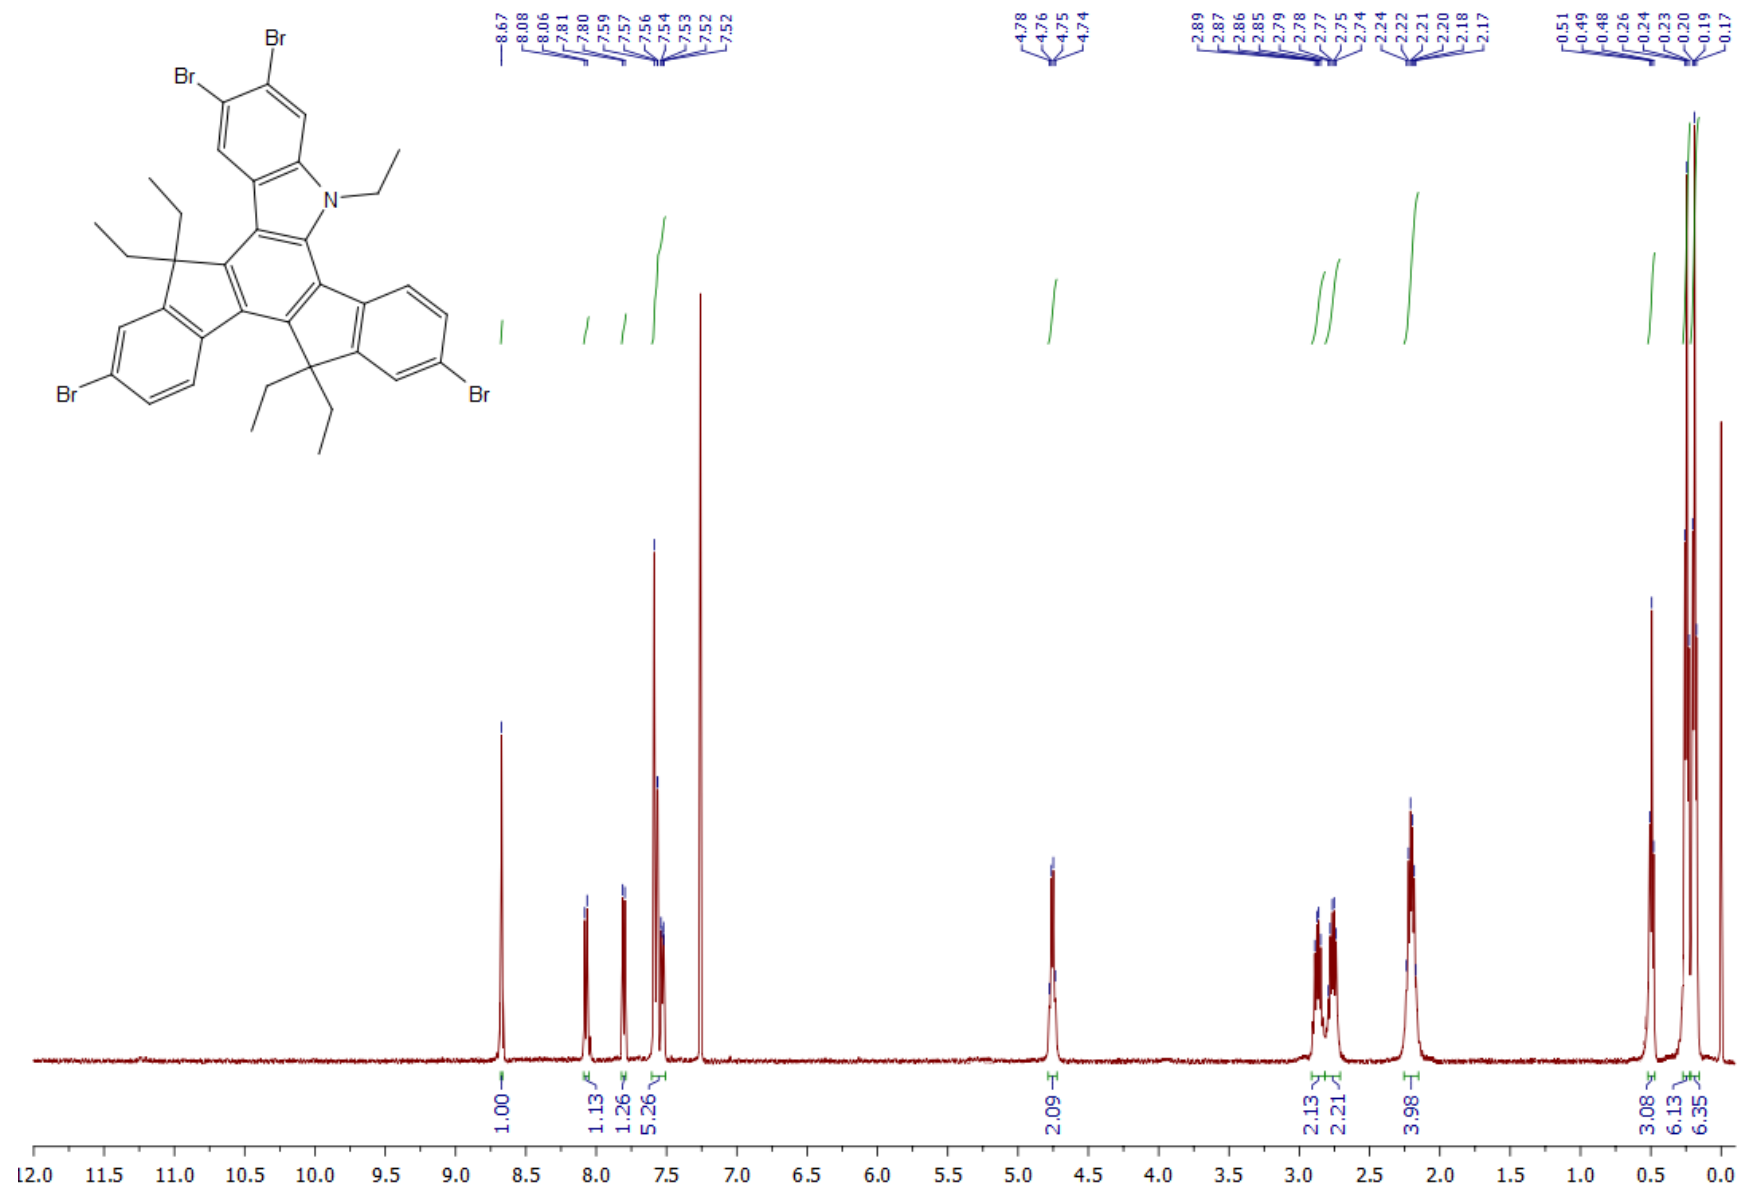

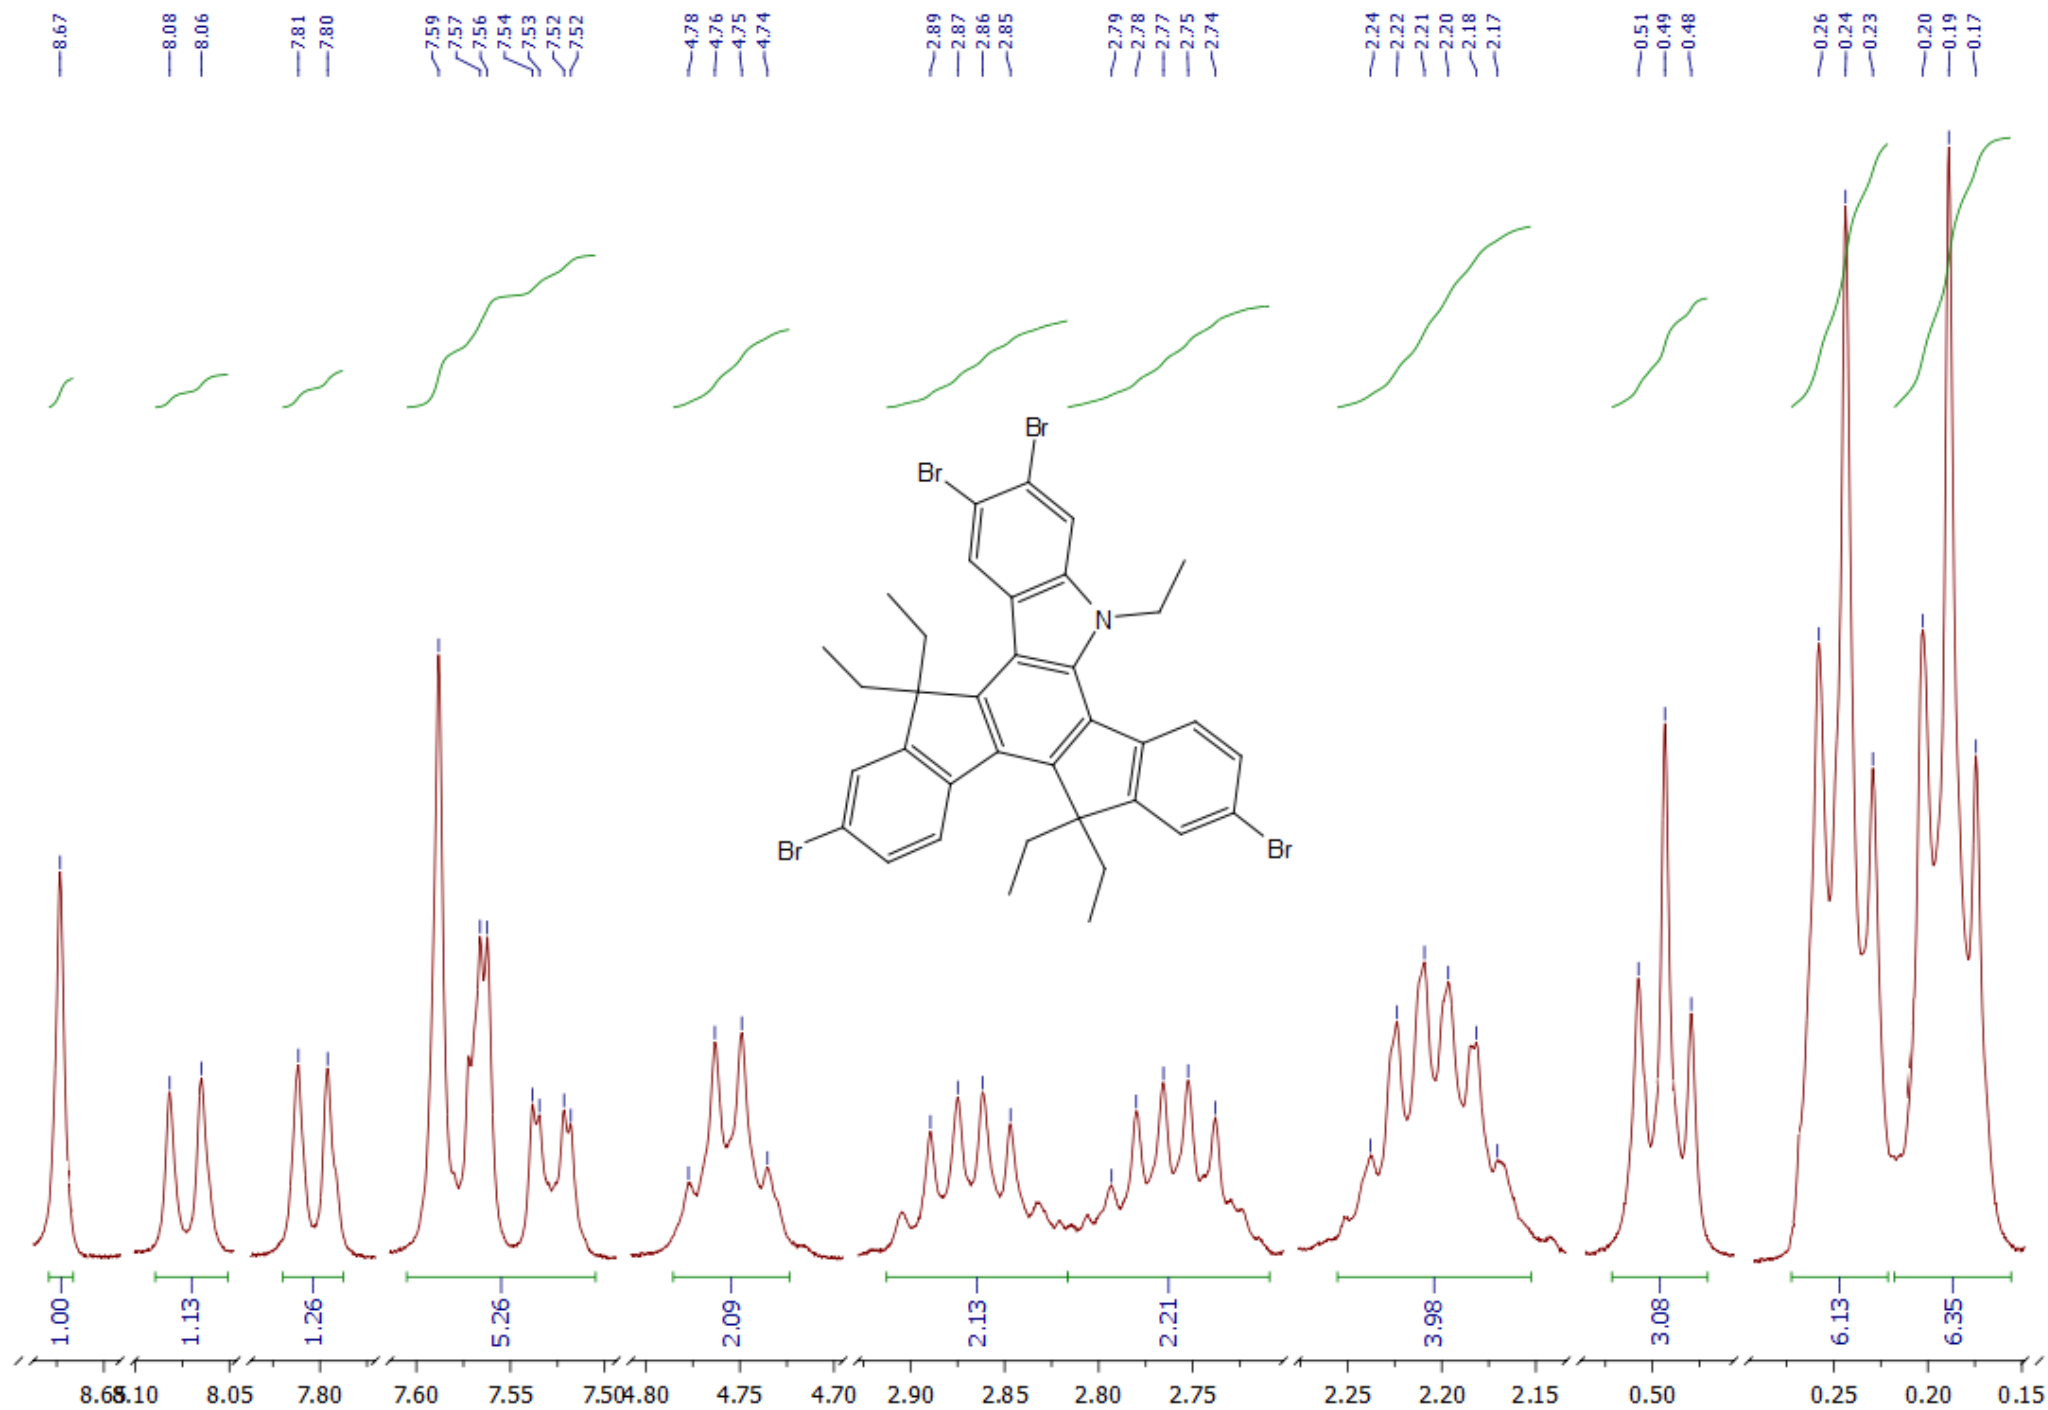



$^{13}\text{C}$   $\{^1\text{H}\}$  NMR spectra of 10 in  $\text{CDCl}_3$  126 MHz

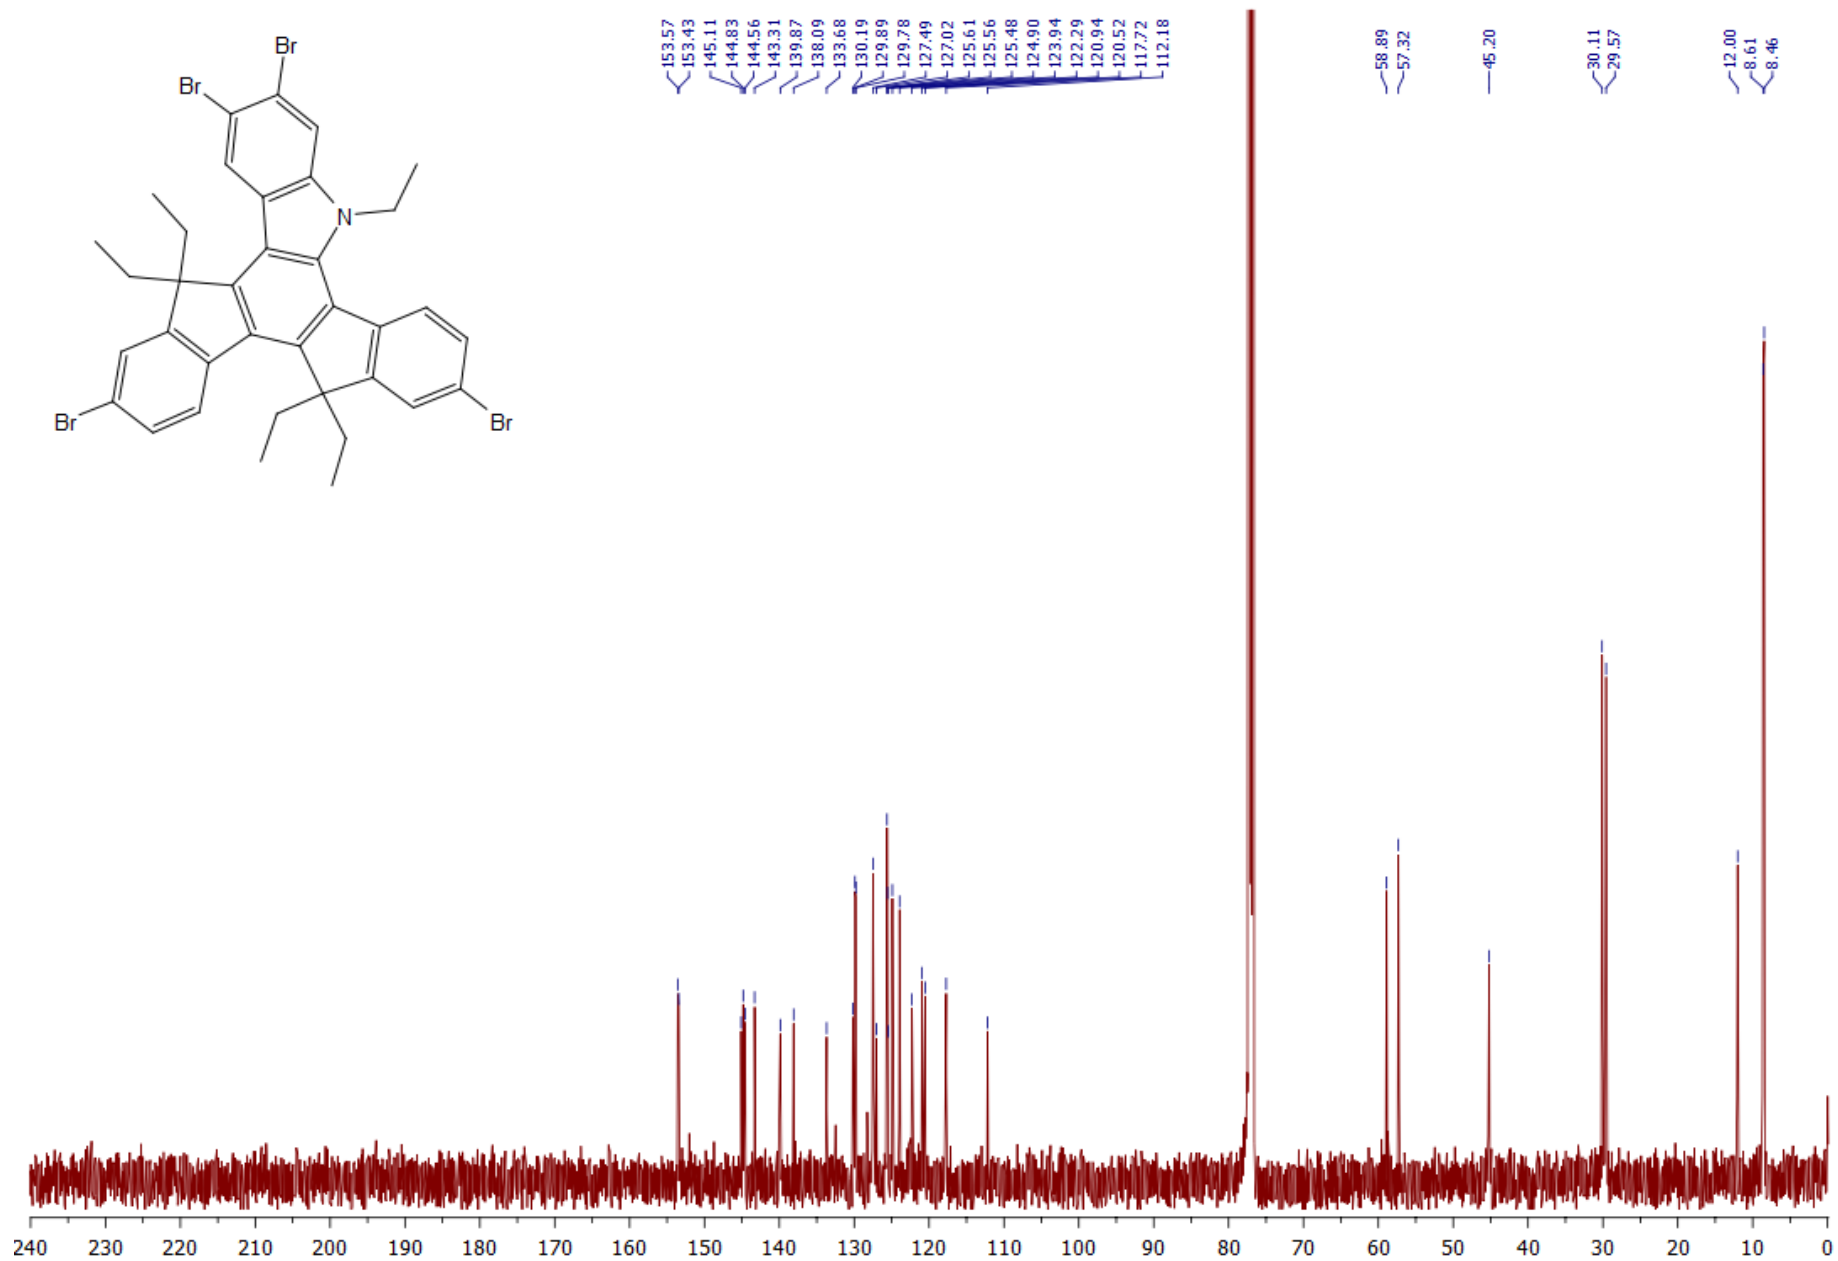

153.57  
153.43  
145.11  
144.83  
144.56  
143.31  
139.87  
138.09  
133.68  
130.19  
129.89  
129.78  
127.49  
127.02  
125.61  
125.56  
124.90  
123.94  
122.29  
120.94  
120.52  
117.72  
112.18  
58.89  
57.32  
45.20  
30.11  
29.57  
12.00  
8.61  
8.46

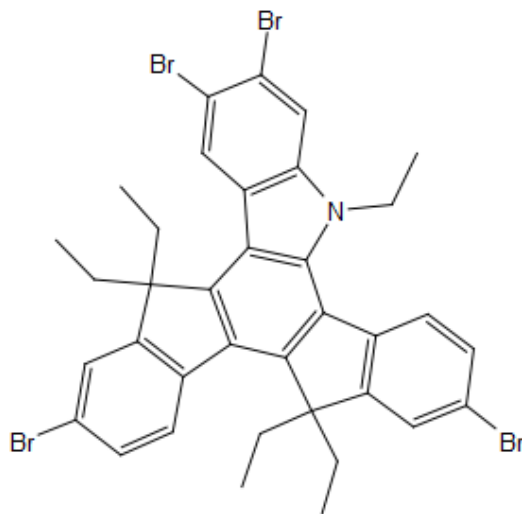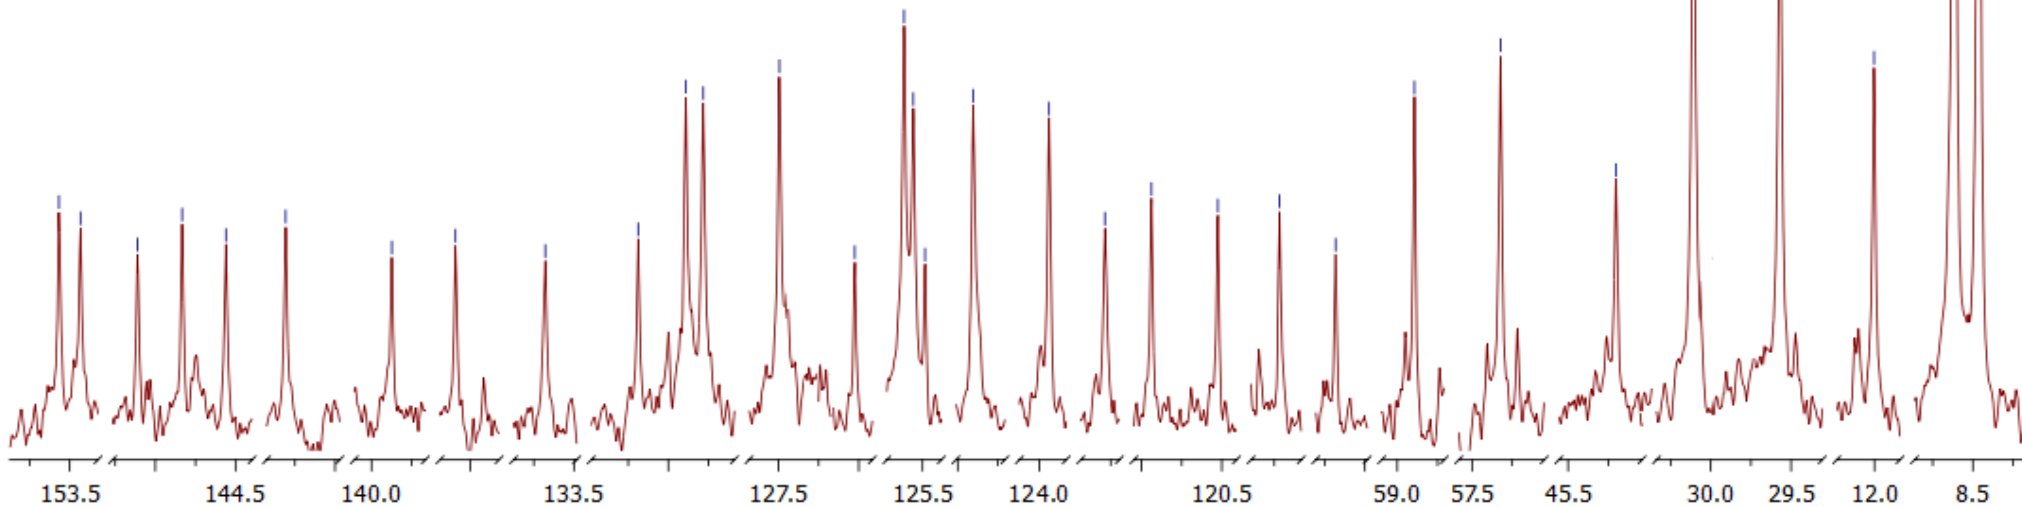

### 13. NMR spectra of 9b in CD<sub>2</sub>Cl<sub>2</sub>

<sup>1</sup>H NMR of 9b in CD<sub>2</sub>Cl<sub>2</sub> 500 MHz

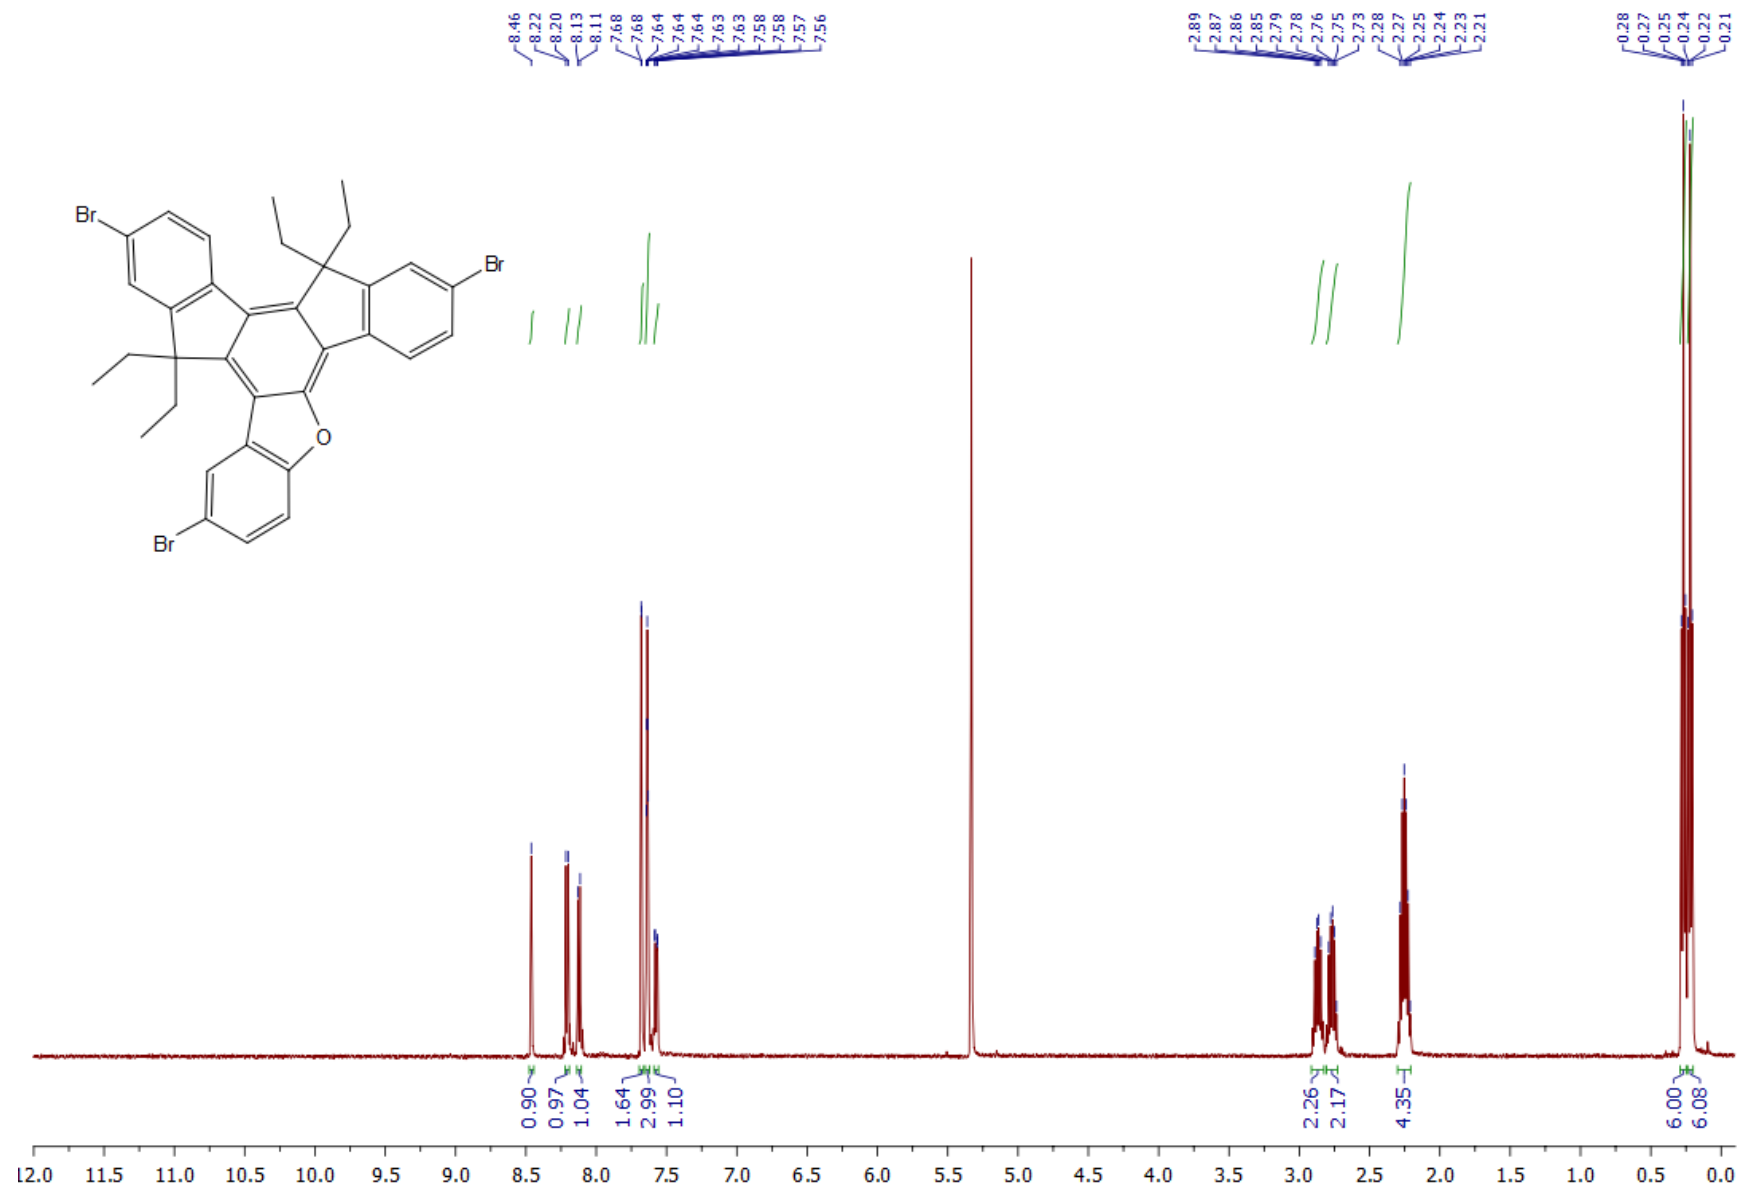

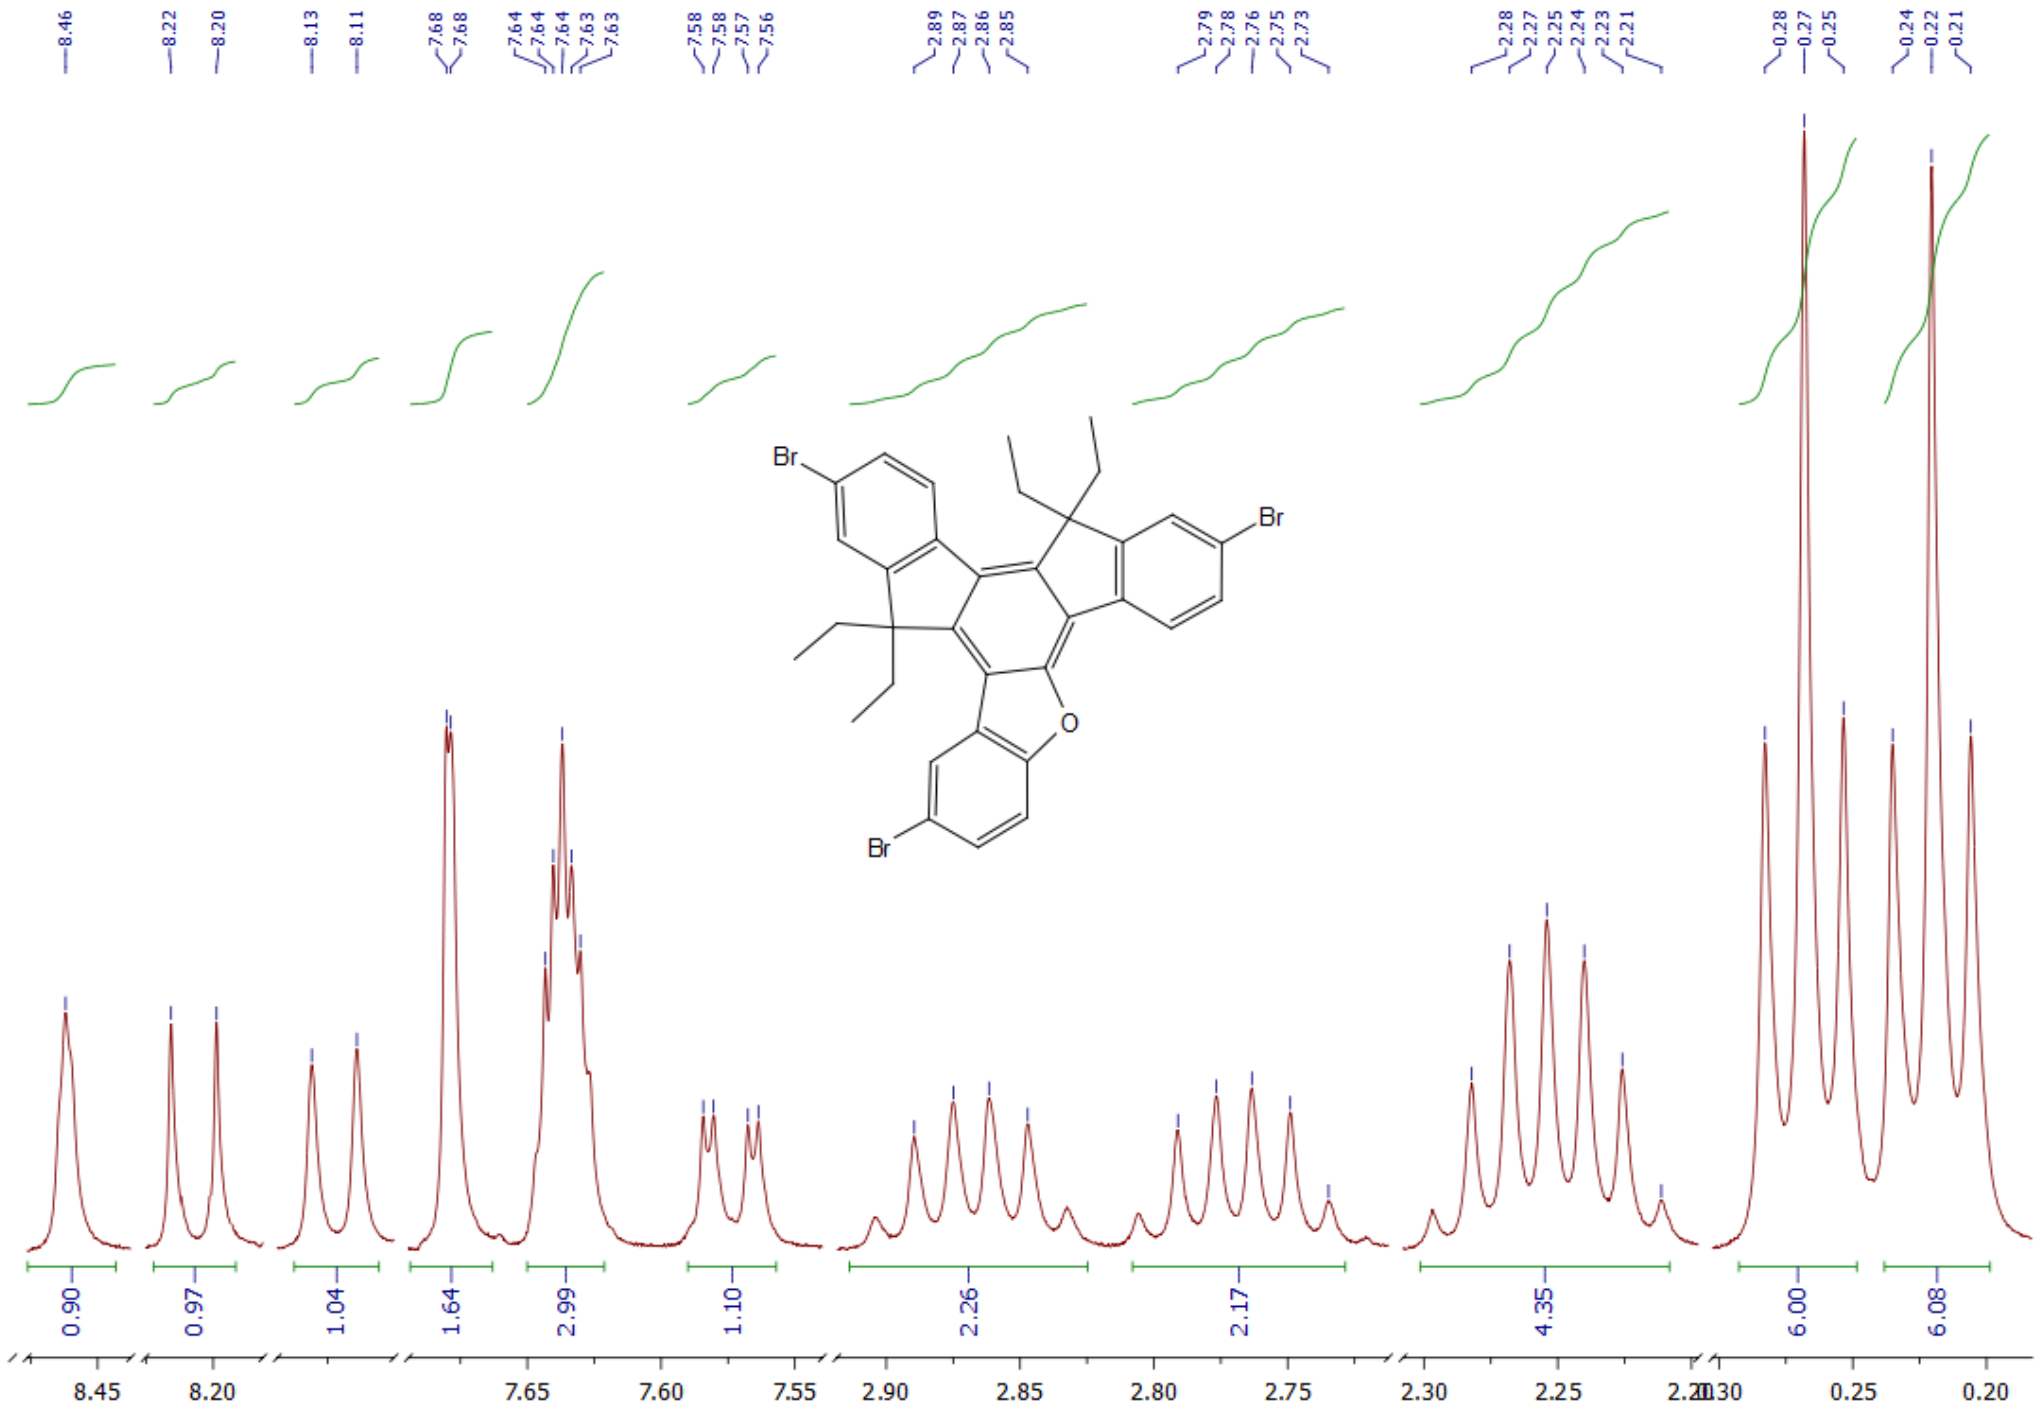

$^{13}\text{C}$   $\{^1\text{H}\}$  NMR spectra of 9b in  $\text{CD}_2\text{Cl}_2$  126 MHz

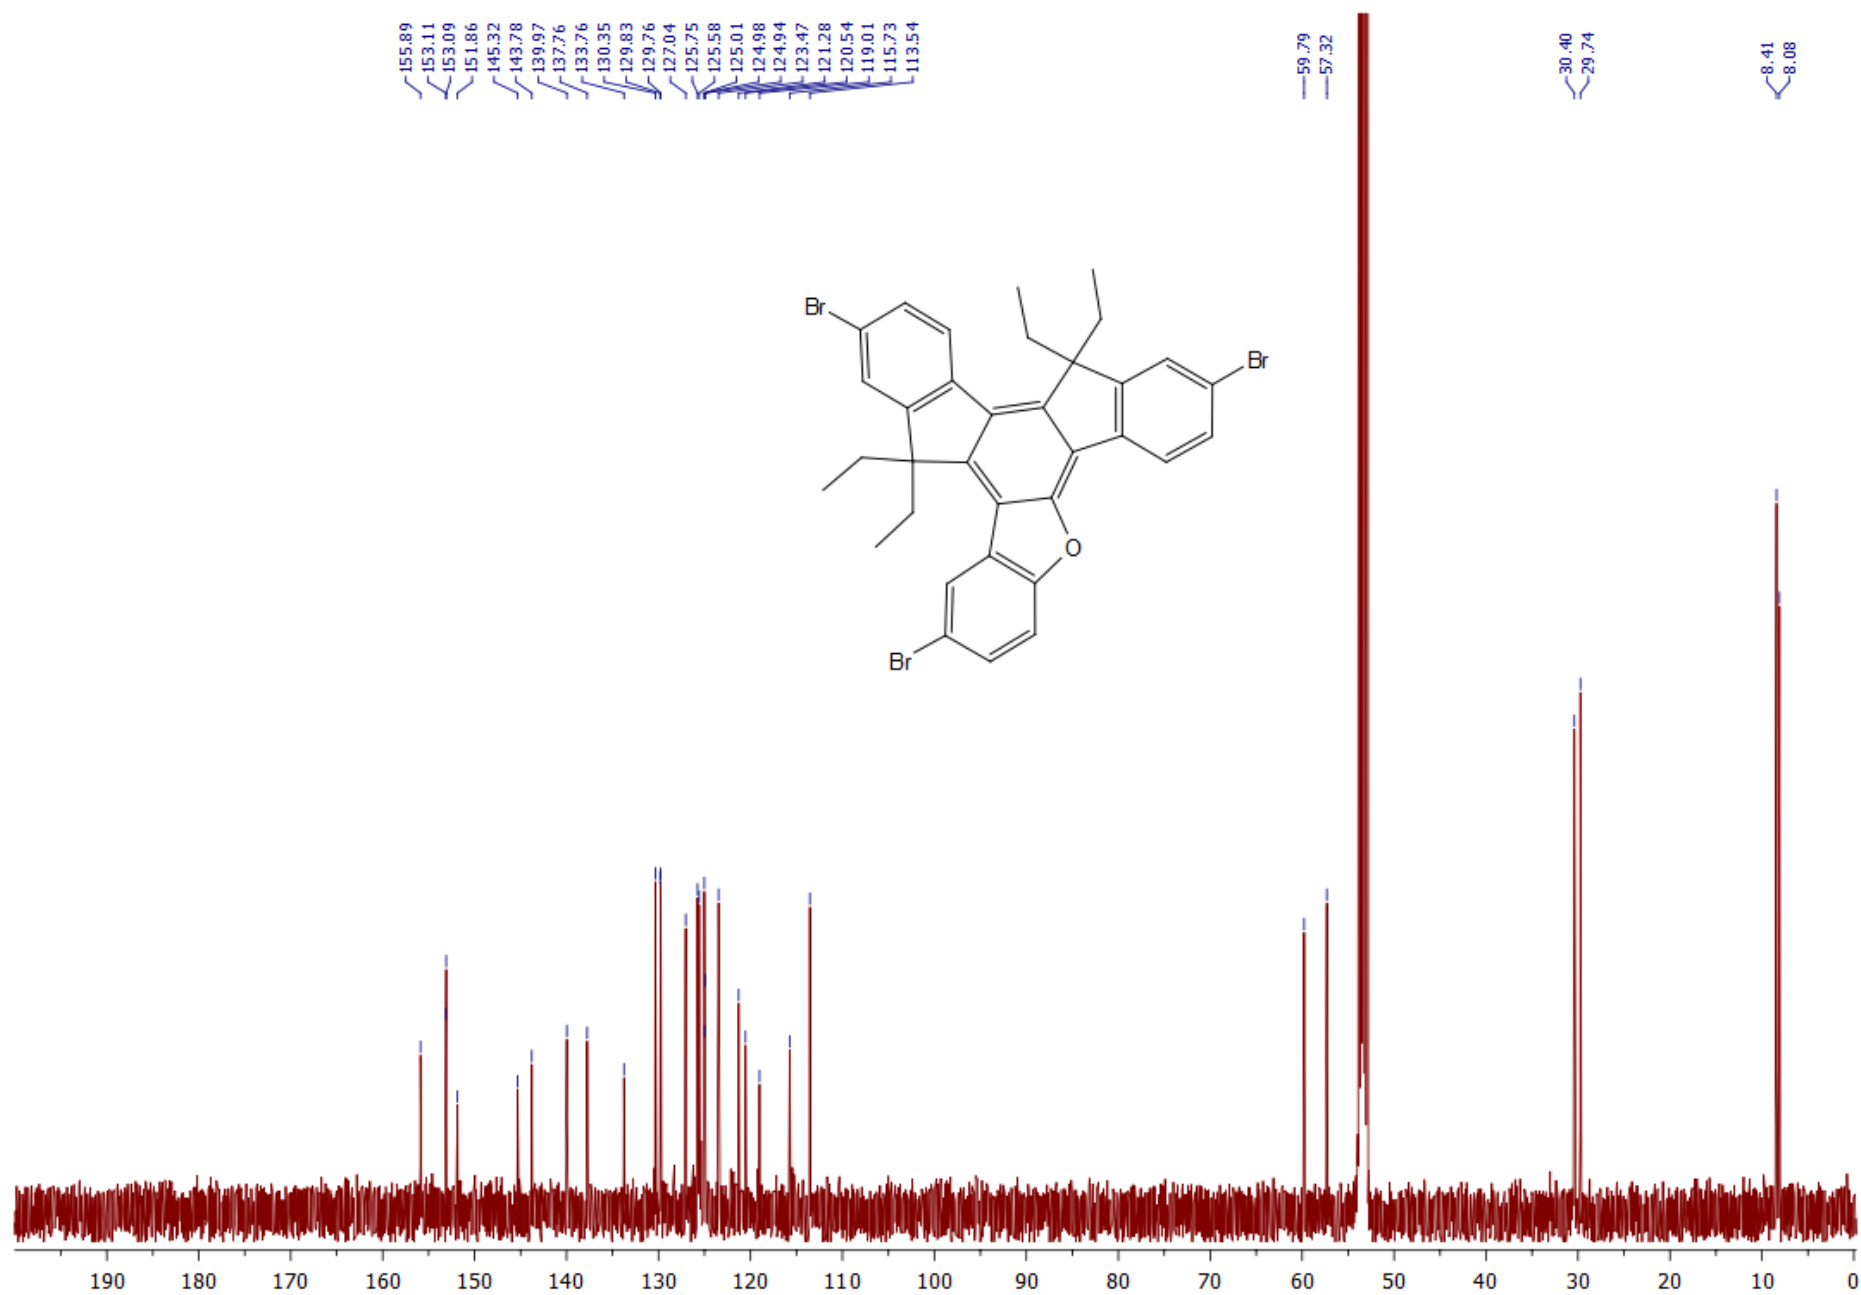

S45

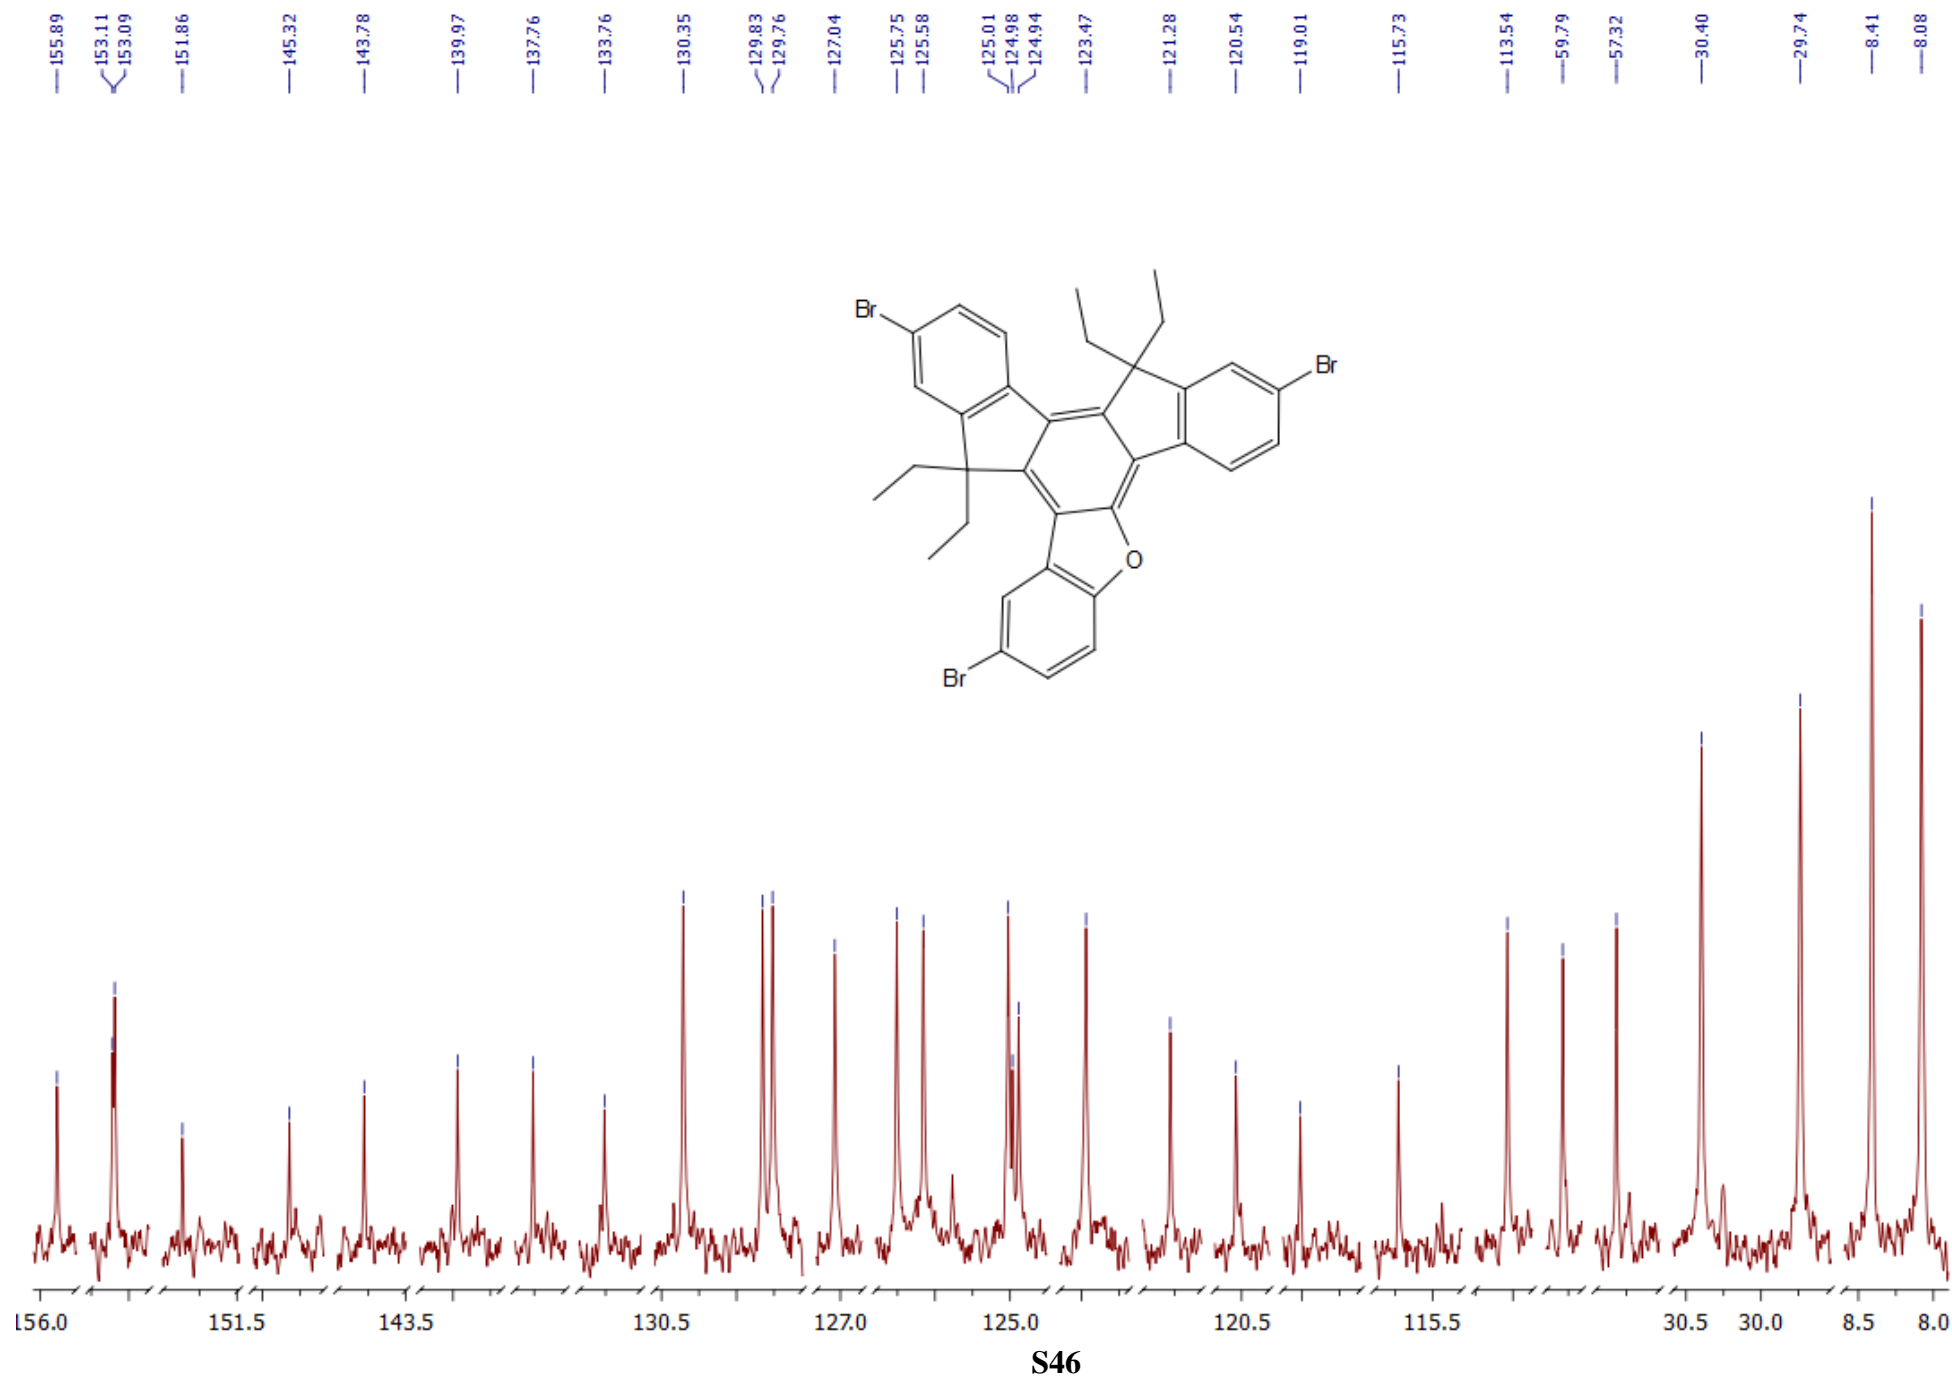

Supplement: d0ra07483g1.pdf [file d0ra07483g1.pdf]
